# Supplementary material
Source: publisher figshare collection journal article supplement (https://acs.figshare.com/ndownloader/files/5905047)

# Synthesis of Fused Imidazole-Containing Ring Systems *via* Dual Oxidative

## Amination of C(sp<sup>3</sup>)-H bonds

Georgette Castanedo,\* Yanzhou Liu, James J. Crawford and Marie-Gabrielle Braun

*Discovery Chemistry, Genentech, Inc., South San Francisco, CA 94080*

### SUPPORTING INFORMATION

#### Table of Contents

|                               |       |
|-------------------------------|-------|
| I. SI Schemes and Tables..... | pg. 1 |
| II. NMRs.....                 | pg. 4 |

#### Reaction Optimization using ethyl 2-thiazol-2-ylacetate and 3-bromobenzylamine:

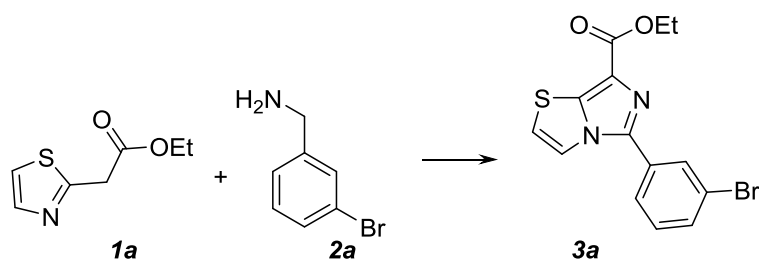

**SI Table 1: Halogen Source Optimization**

| Entry | Iodine Source      | Yield of compound <b>3a</b><br>(%) <sup>a,b</sup> | % conversion of <b>1a</b> |
|-------|--------------------|---------------------------------------------------|---------------------------|
| 1     | Iodine             | 64                                                | 100                       |
| 2     | NIS                | 84                                                | 100                       |
| 3     | Bu <sub>4</sub> NI | 23                                                | 100                       |
| 4     | KI                 | 25                                                | 100                       |

<sup>a</sup> Yield of **3a**, determined by LCMS using naphthalene as a quantitative internal standard.

<sup>b</sup> Correction factor of 1.05 applied to LCMS yields of **3a** after determining difference in ratios of

product to starting material by LCMS/NMR

**SI Table 2: Solvent Optimization**

| Entry | Solvent | Yield of compound <b>3a</b><br>(%) <sup>a,b</sup> | % conversion of <b>1a</b> |
|-------|---------|---------------------------------------------------|---------------------------|
| 1     | DMA     | 85                                                | 100                       |
| 2     | DMF     | 87                                                | 100                       |
| 3     | DMSO    | 86                                                | 100                       |
| 4     | ACN     | 92                                                | 100                       |

<sup>a</sup> Yield of **3a**, determined by LCMS using naphthalene as a quantitative internal standard

<sup>b</sup> Correction factor of 1.05 applied to LCMS yields of **3a** after determining difference in ratios of product to starting material by LCMS/NMR

**SI Table 3:  $\beta$ -Keto ester as substrate**

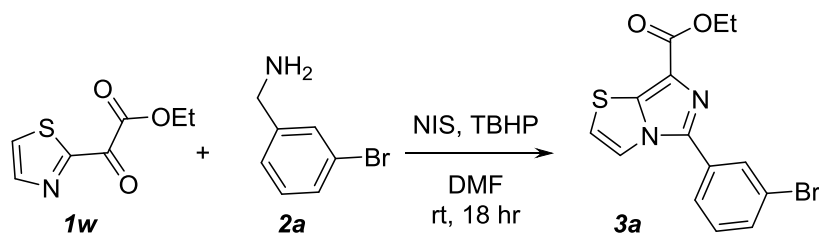

| Entry | Substrate | Yield of compound <b>3a</b> (%) <sup>a,b</sup> | % conversion of <b>1w</b> |
|-------|-----------|------------------------------------------------|---------------------------|
| 1     | <b>1w</b> | 89                                             | 100                       |

<sup>a</sup> Yield of **3**, determined by LCMS using naphthalene as a quantitative internal standard

<sup>b</sup> Correction factor of 1.05 applied to LCMS yields of **3a** after determining difference in ratios of product to starting material by LCMS/NMR

**SI Table 4: Control Experiments**

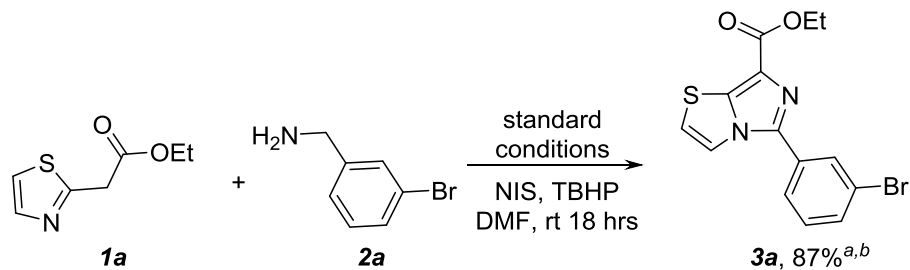

|           |   |                 |                                                               |                               |
|-----------|---|-----------------|---------------------------------------------------------------|-------------------------------|
| <b>1a</b> | + | <b>no amine</b> | $\xrightarrow{\text{standard conditions}}$                    | <b>[O] of 1</b>               |
| <b>1a</b> | + | <b>2a</b>       | $\xrightarrow[\text{MINUS NIS}]{\text{standard conditions}}$  | <b>no product</b>             |
| <b>1a</b> | + | <b>2a</b>       | $\xrightarrow[\text{MINUS TBHP}]{\text{standard conditions}}$ | <b>3a, 59\%<sup>a,b</sup></b> |

| Entry | Reagent Missing | Yield of compound 3a (%) <sup>a,b</sup> | % conversion of 1 |
|-------|-----------------|-----------------------------------------|-------------------|
| 1     | No Amine        | 0                                       | 95 <sup>c</sup>   |
| 2     | No NIS          | 0                                       | 72                |
| 3     | No TBHP         | 59                                      | 75                |

<sup>a</sup> Yield of **3a**, determined by LCMS using naphthalene as a quantitative internal standard

<sup>b</sup> Correction factor of 1.05 applied to LCMS yields of **3a** after determining difference in ratios of product to starting material by LCMS/NMR

<sup>c</sup> Mass for oxidation of **1a** to **1w** was seen by mass spec which is consistent with observations from Mohan, D.; Rao, S.; Ravi, C.; and Adimurthy, S. *Org. Biomol. Chem.* **2015**, *13*, 5602.

# **NMR Characterization Data** **Starting Material 1e**

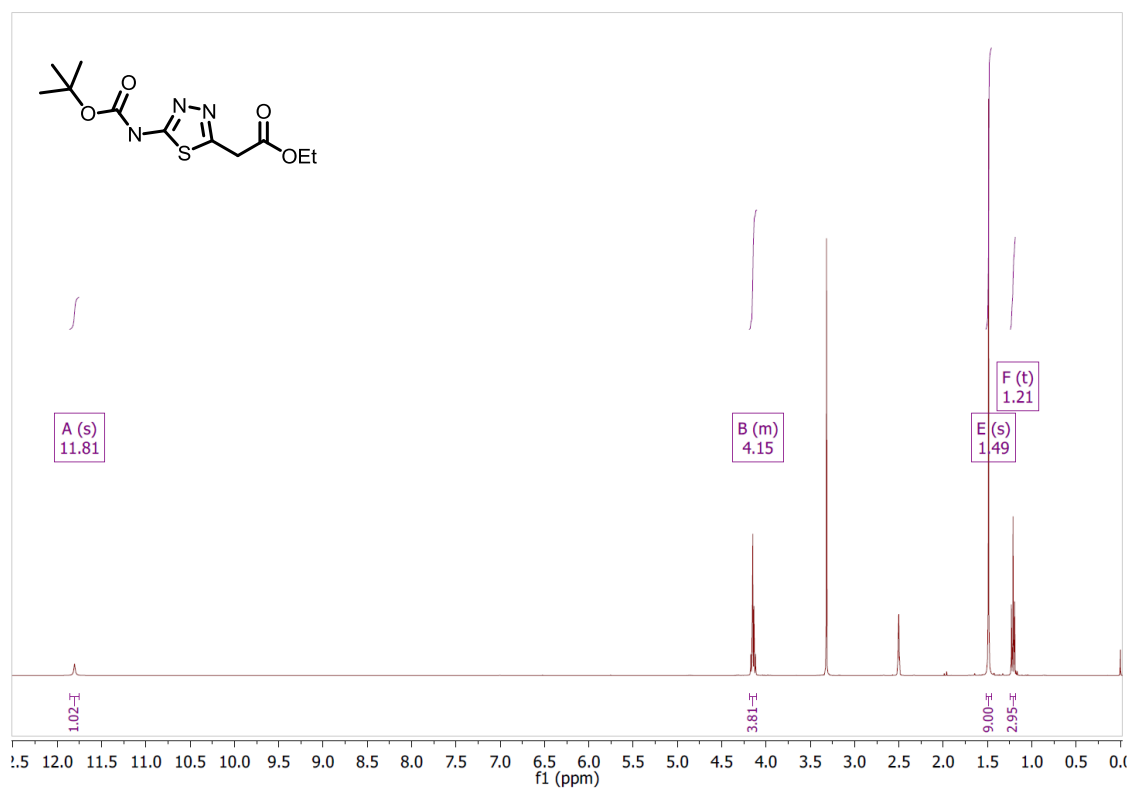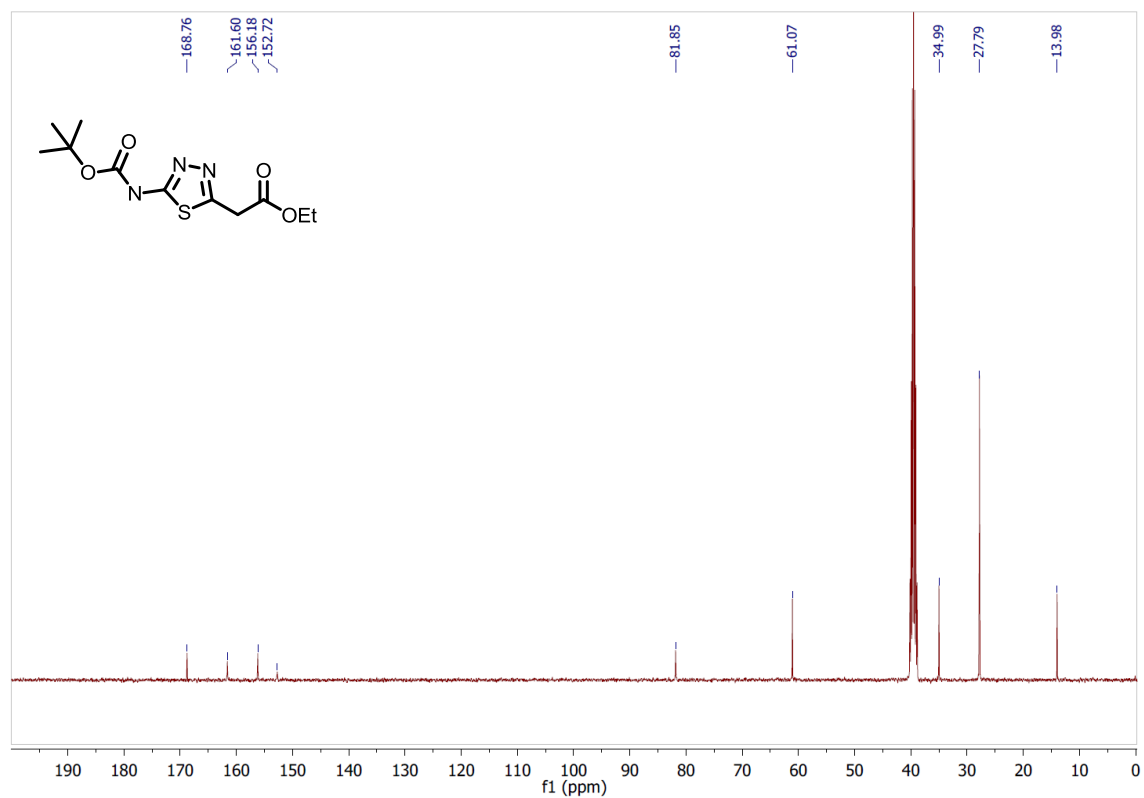

## Starting Material 1h

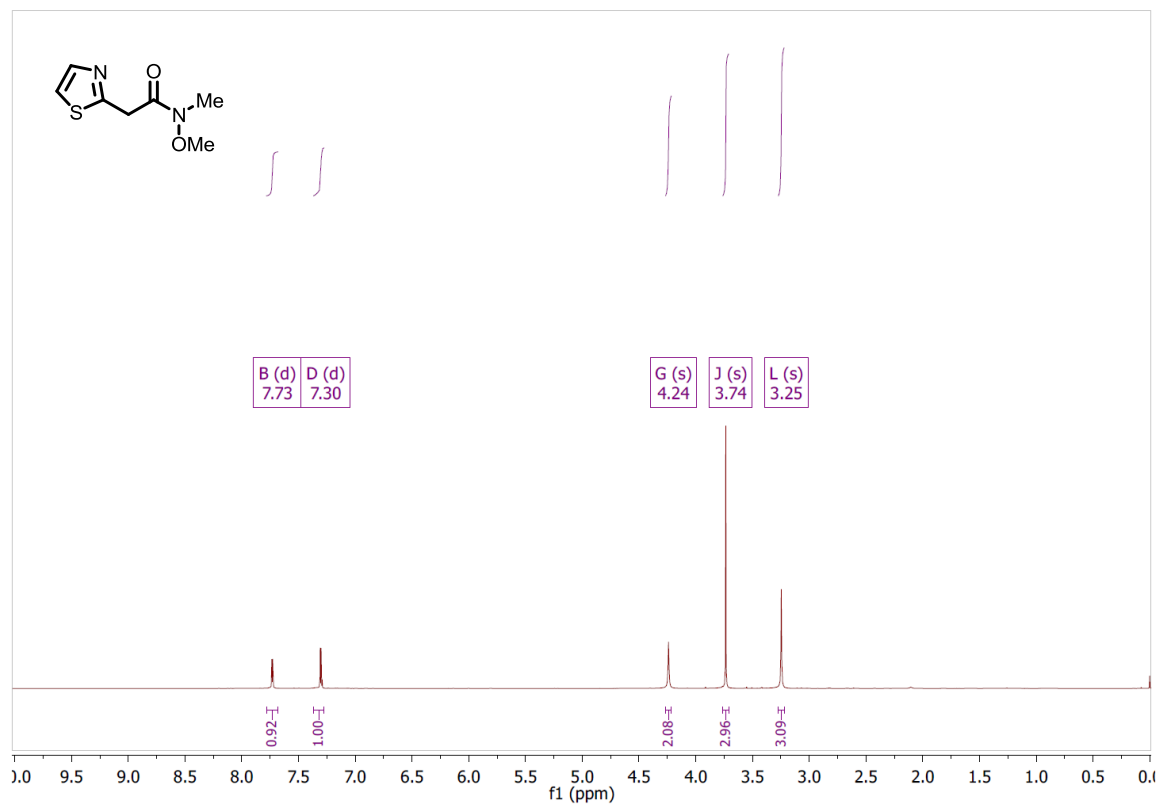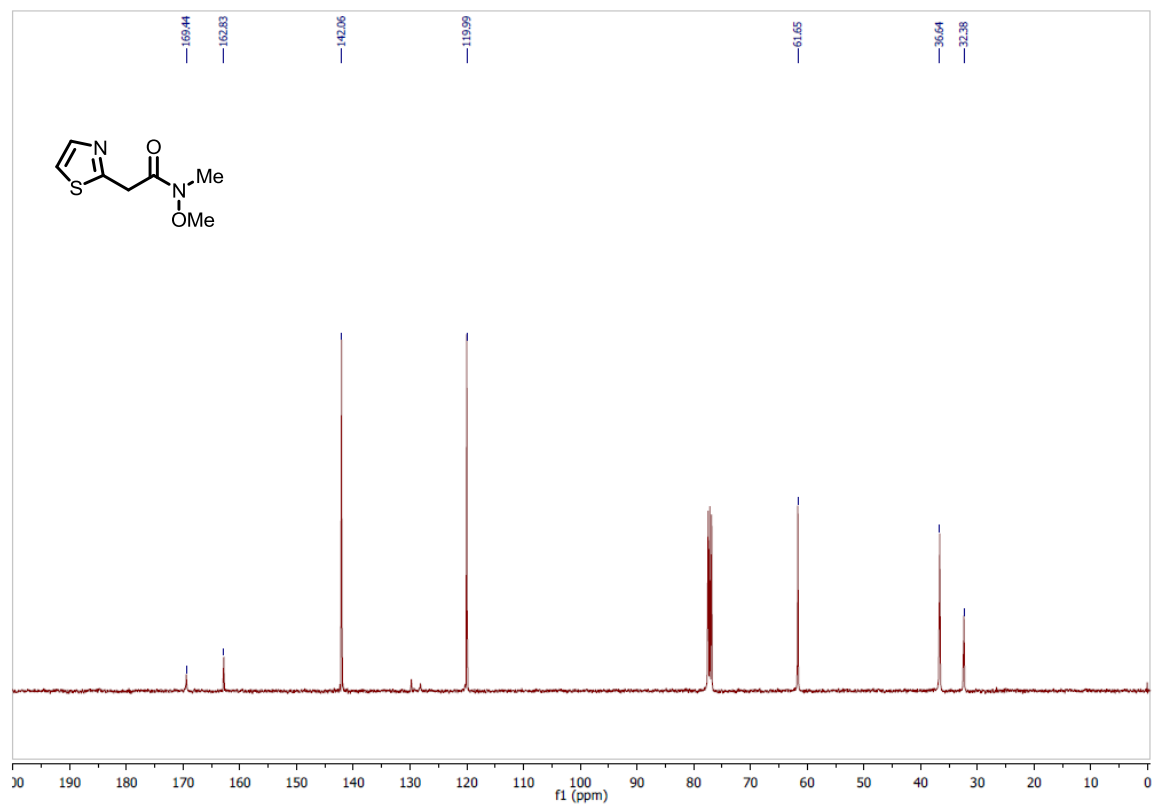

## Starting Material *1p*

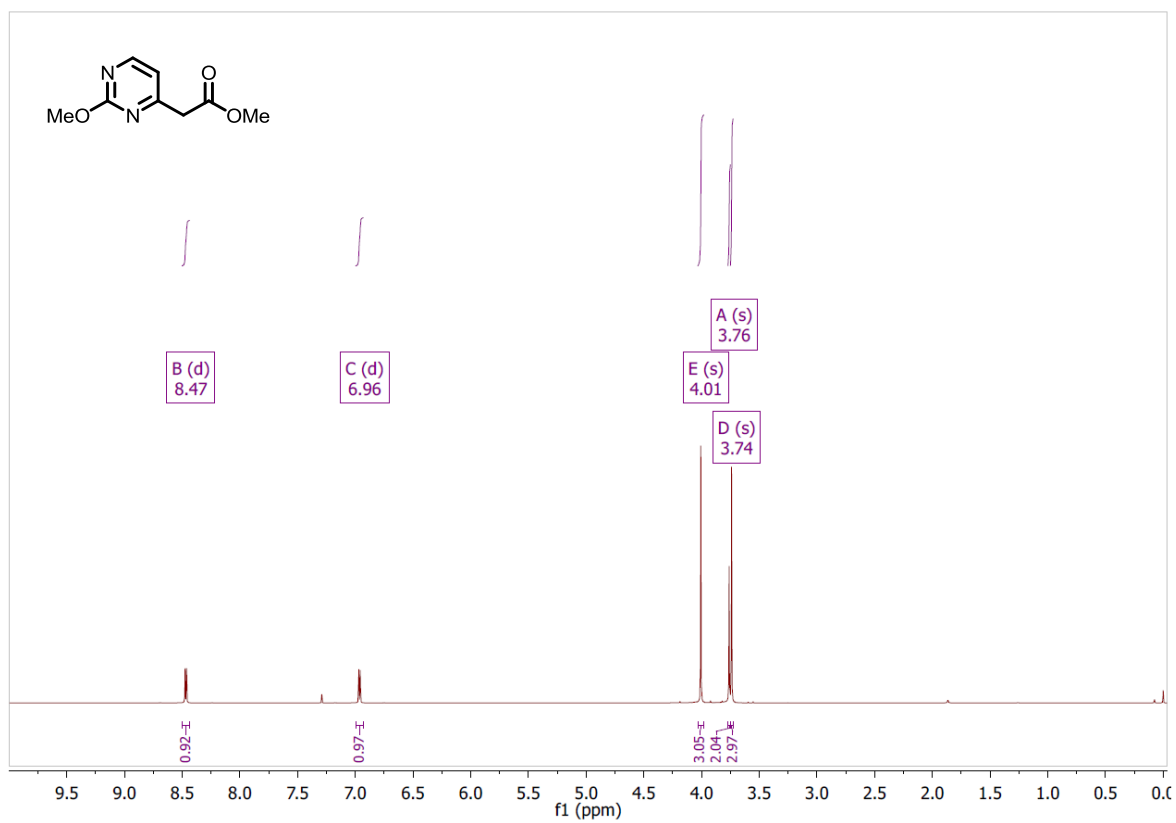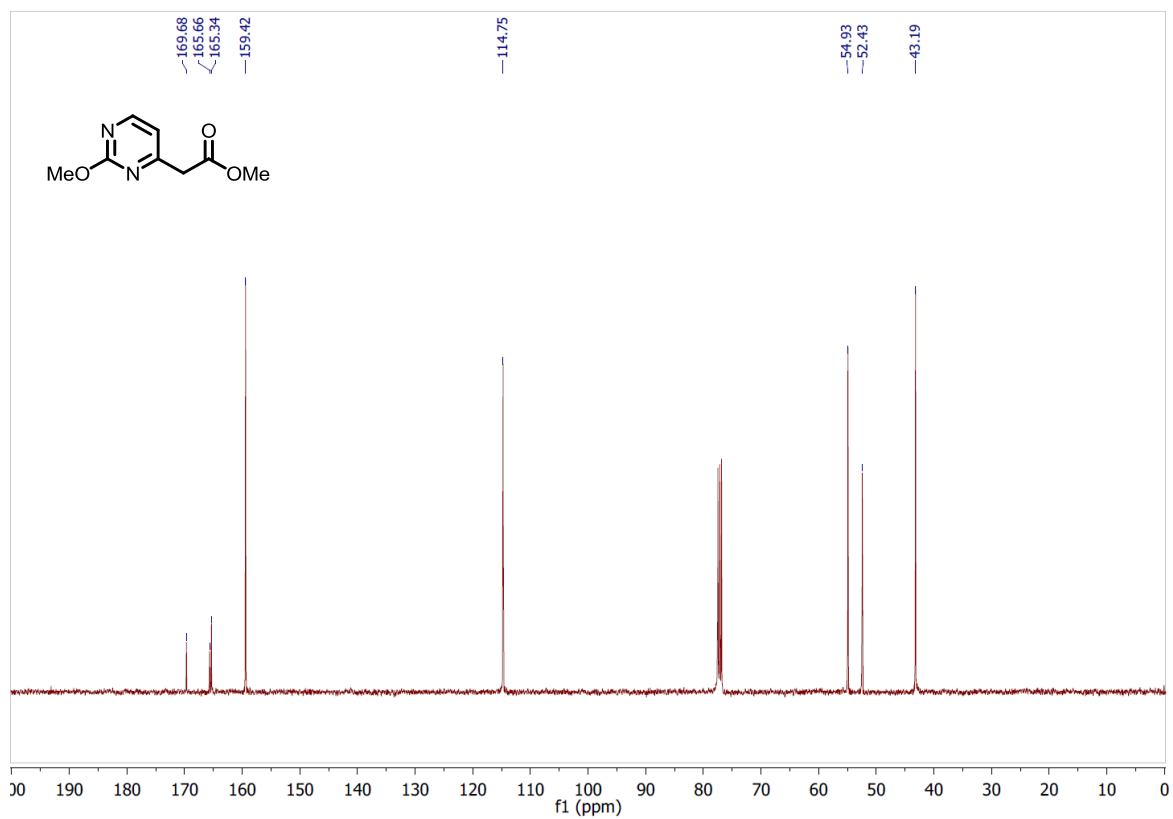

## Starting Material 1q

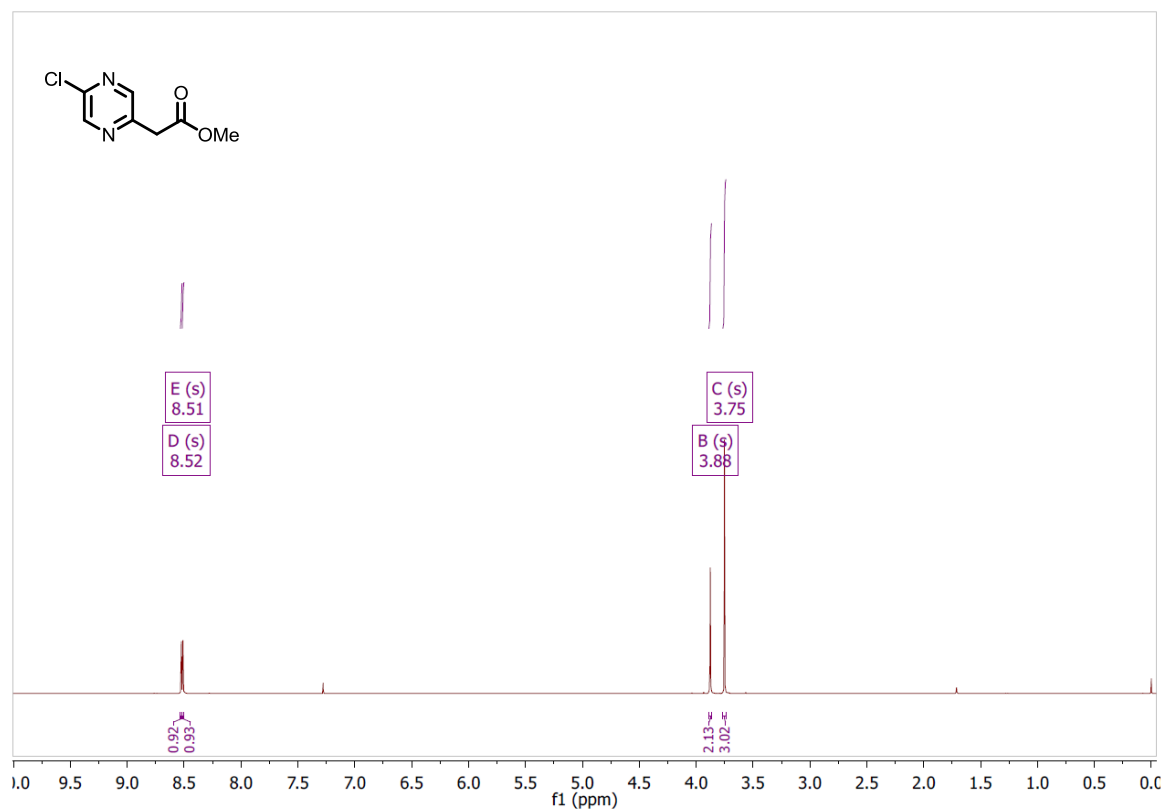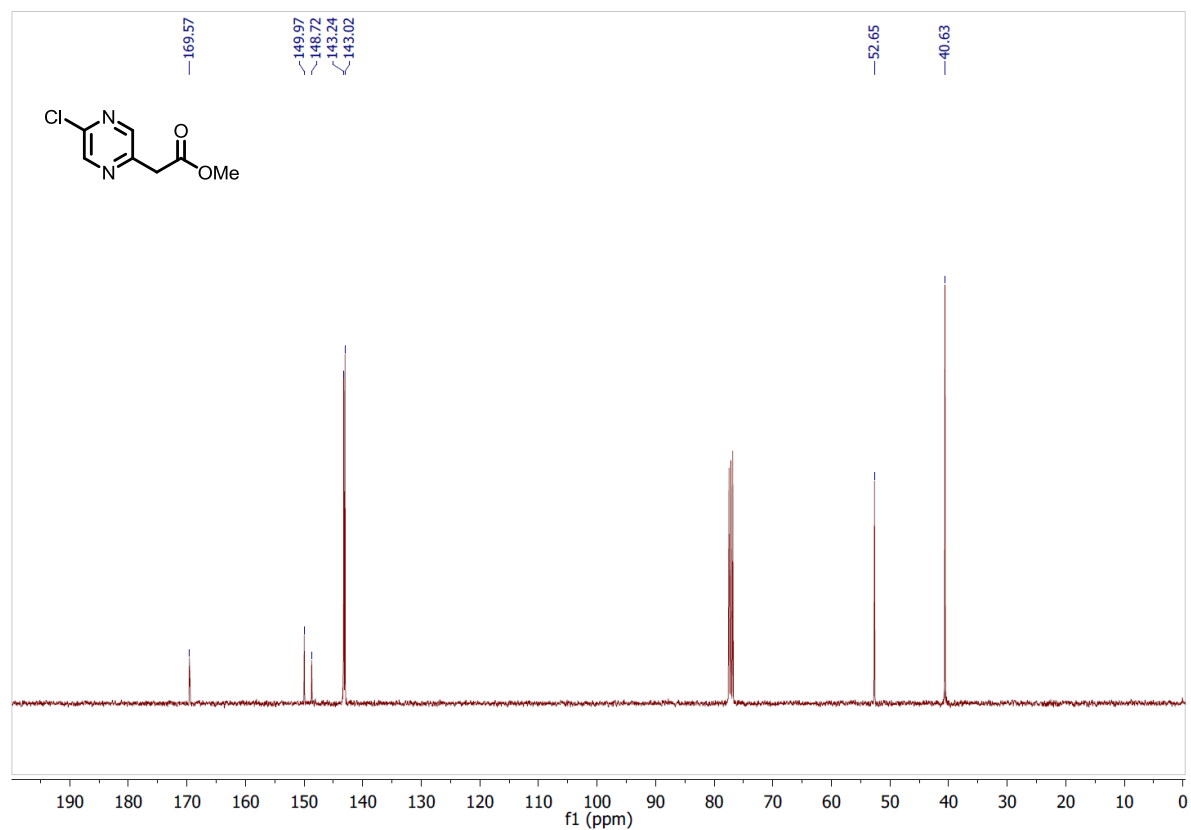

# Compound 3a

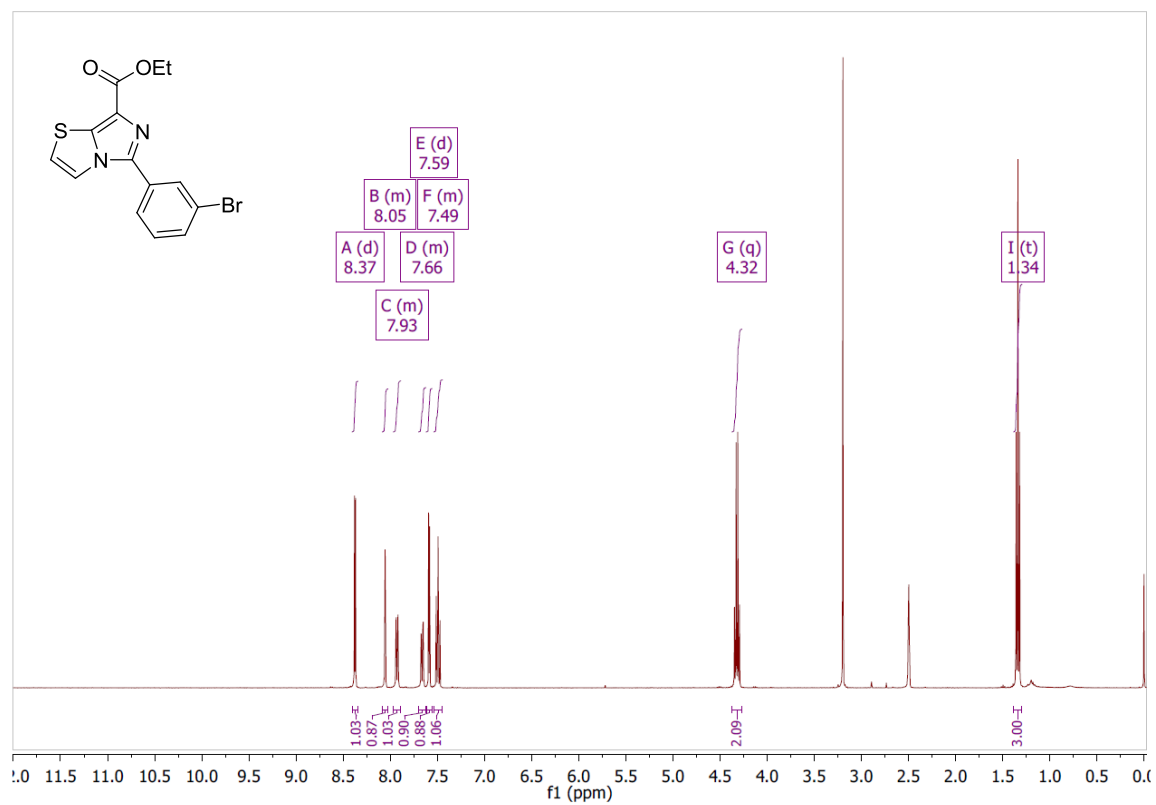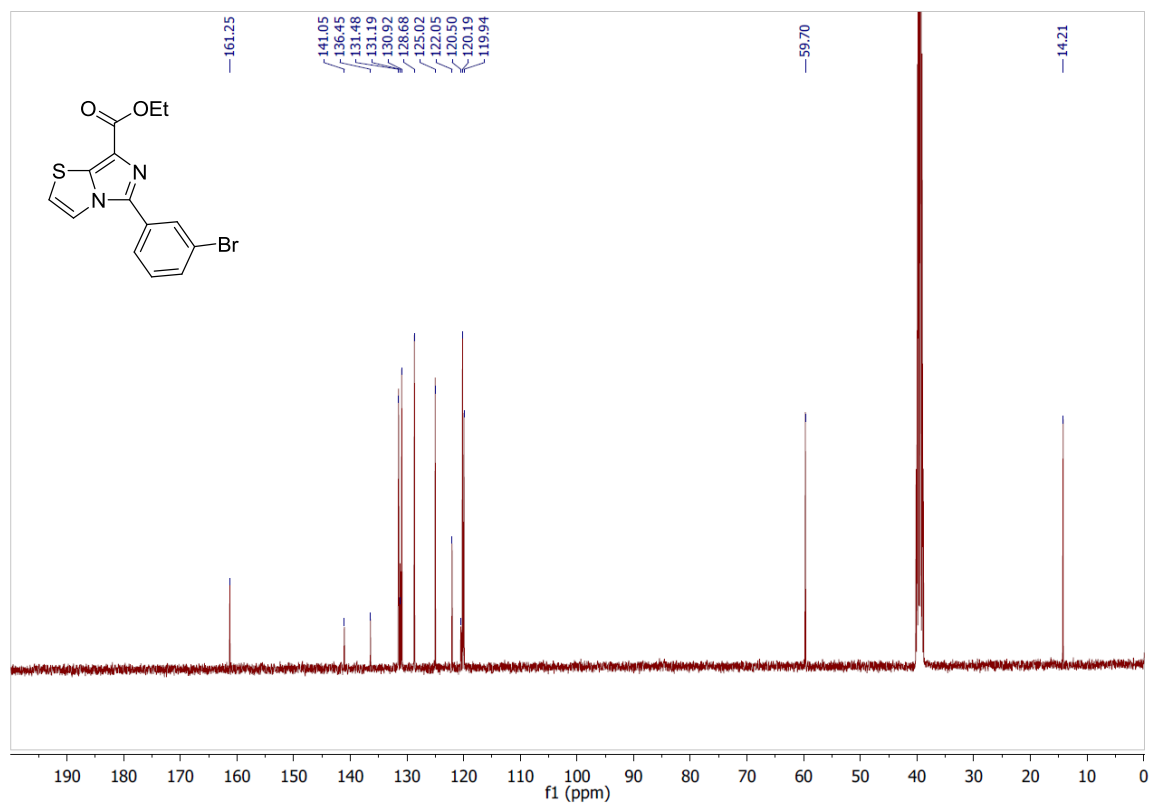



# Compound 3b

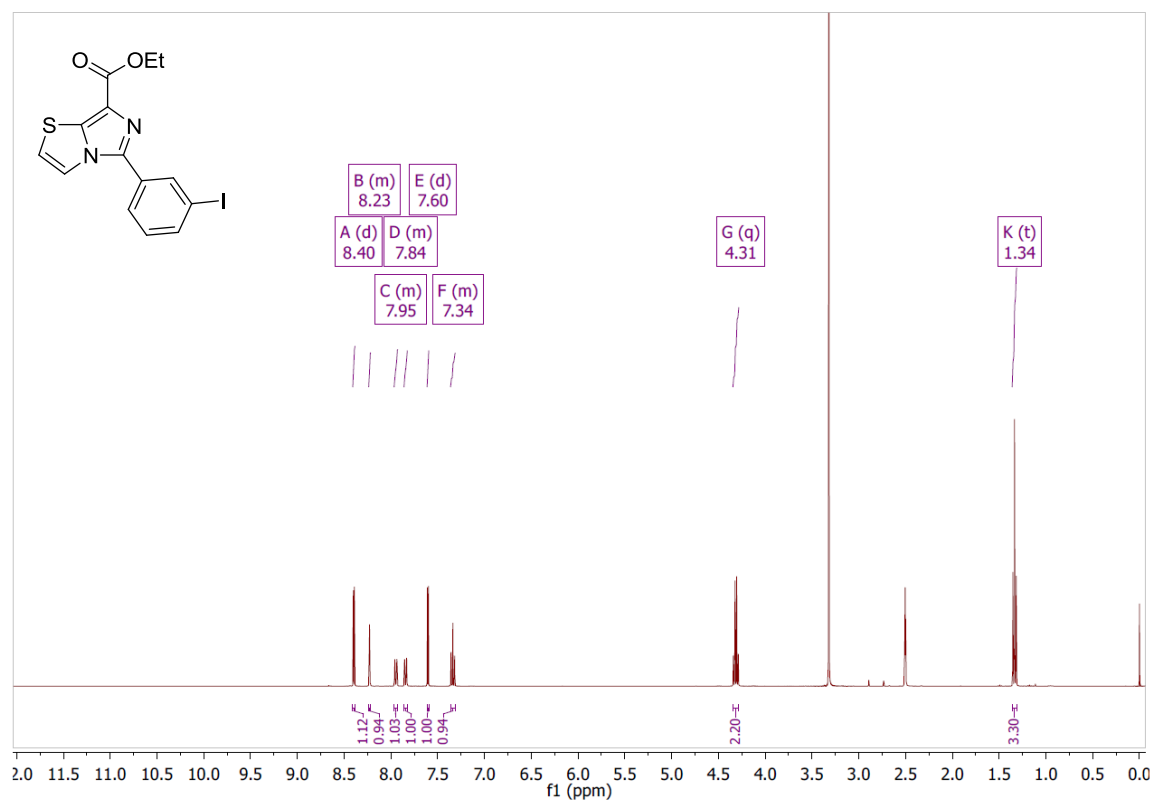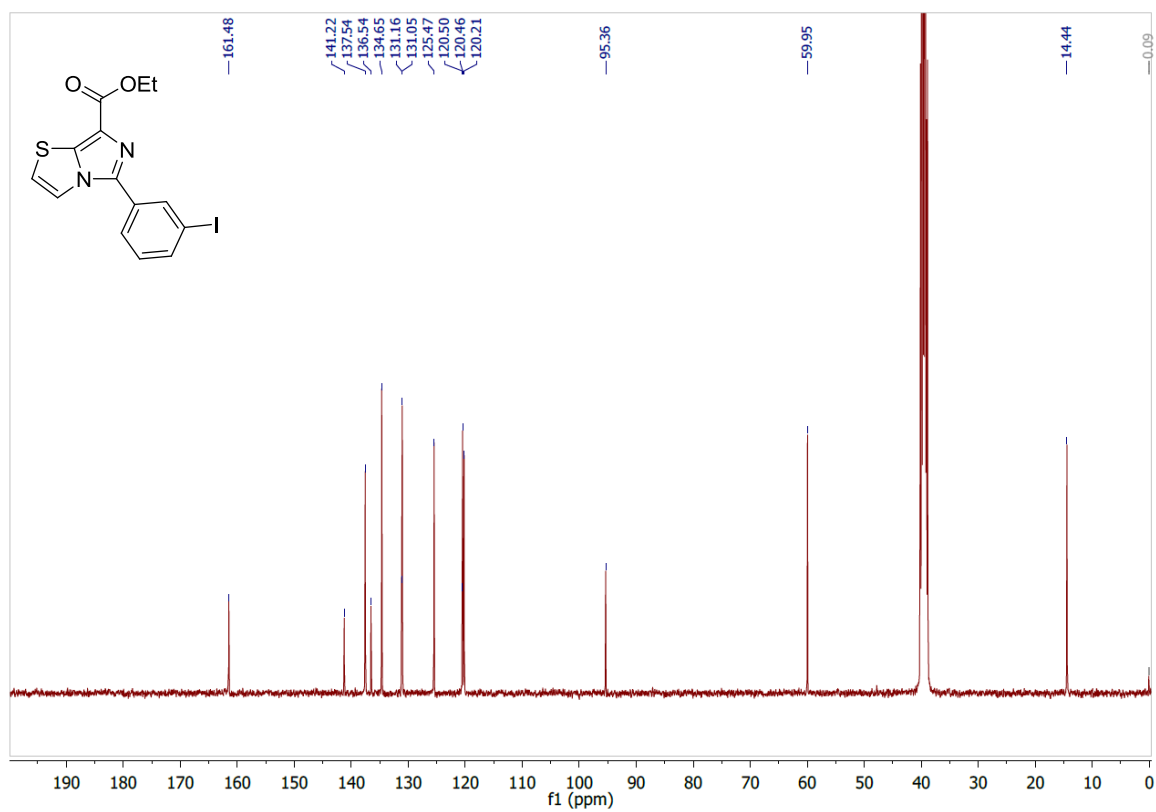

# Compound 3c

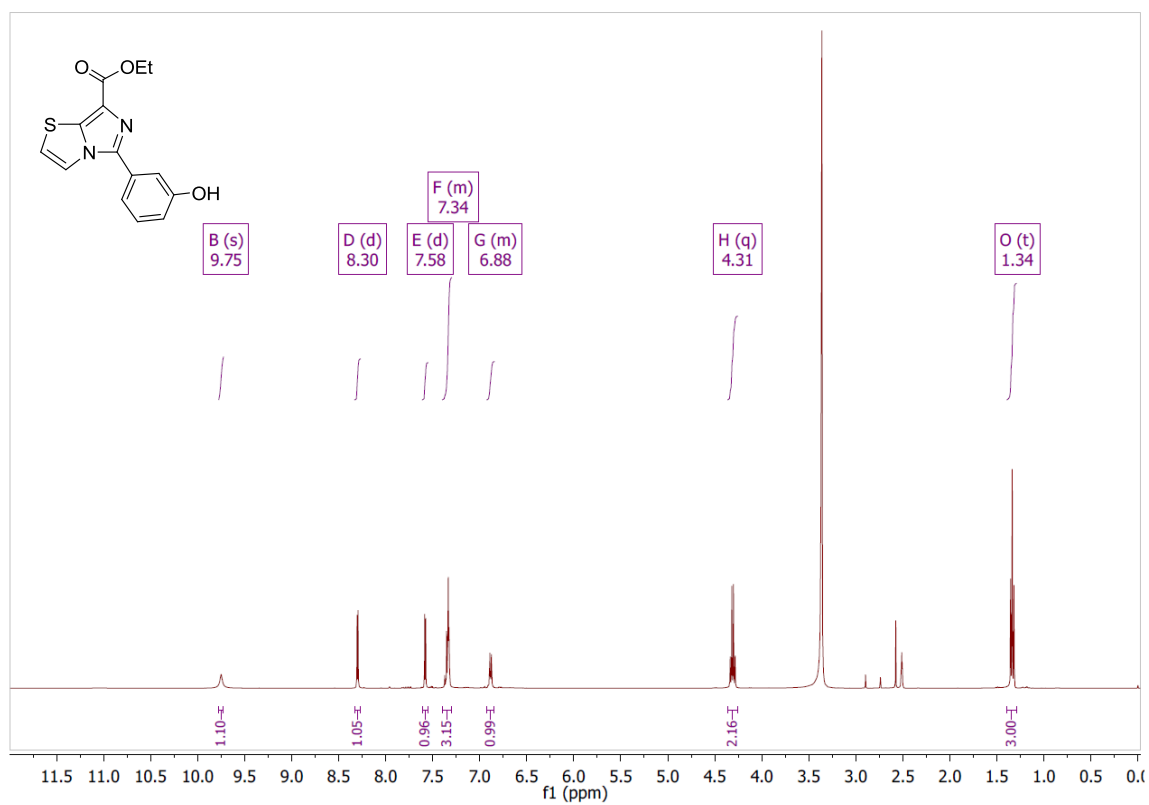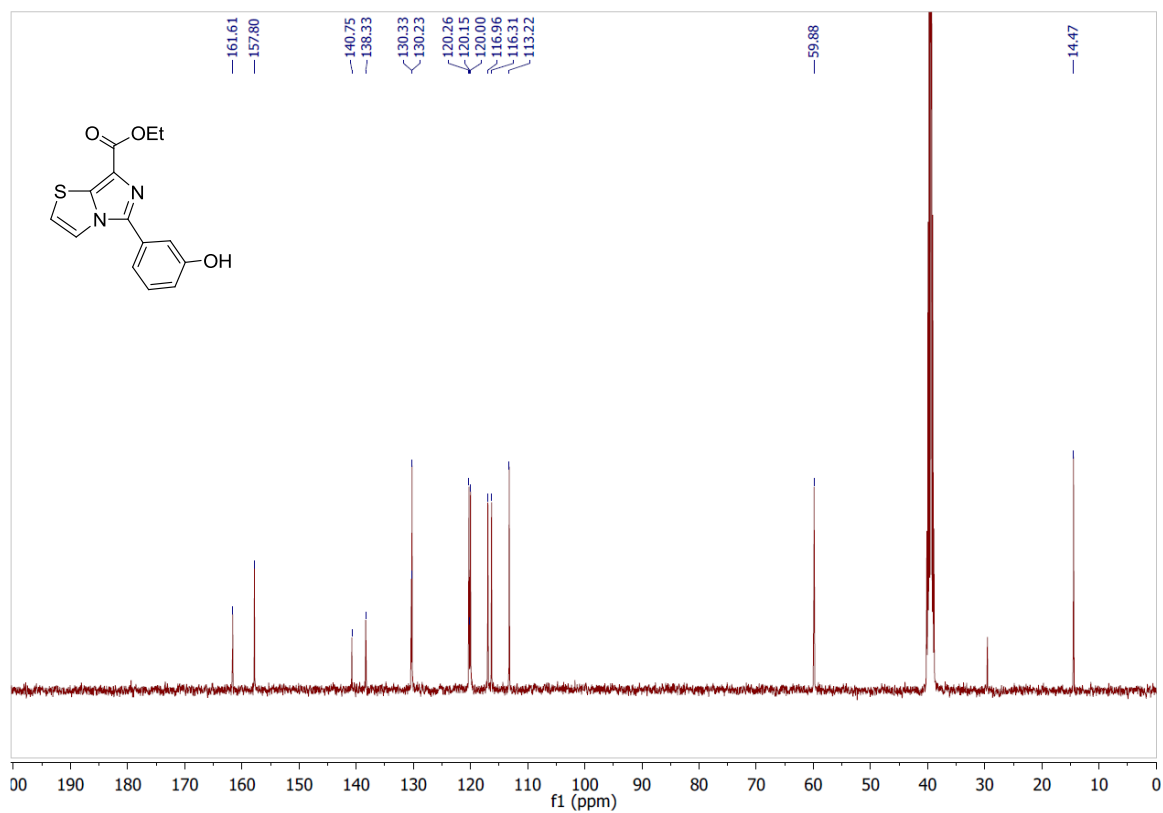

# Compound 3d

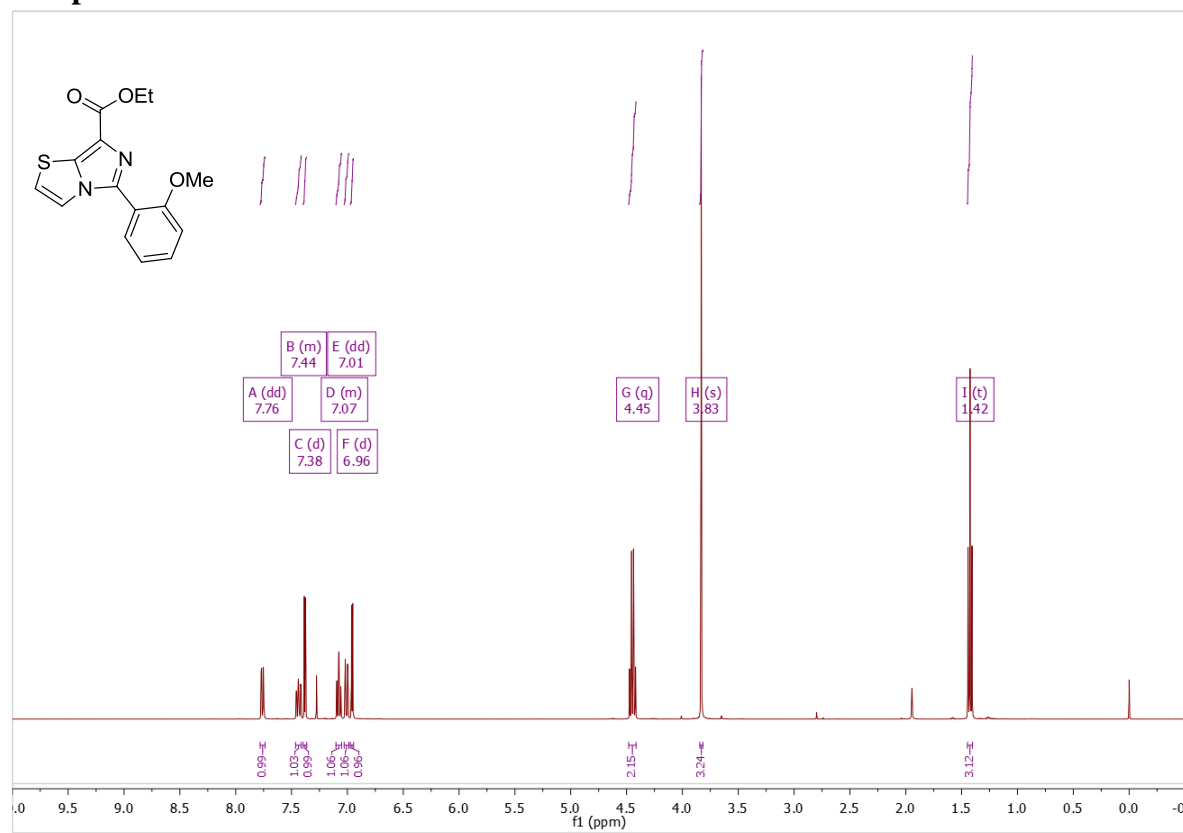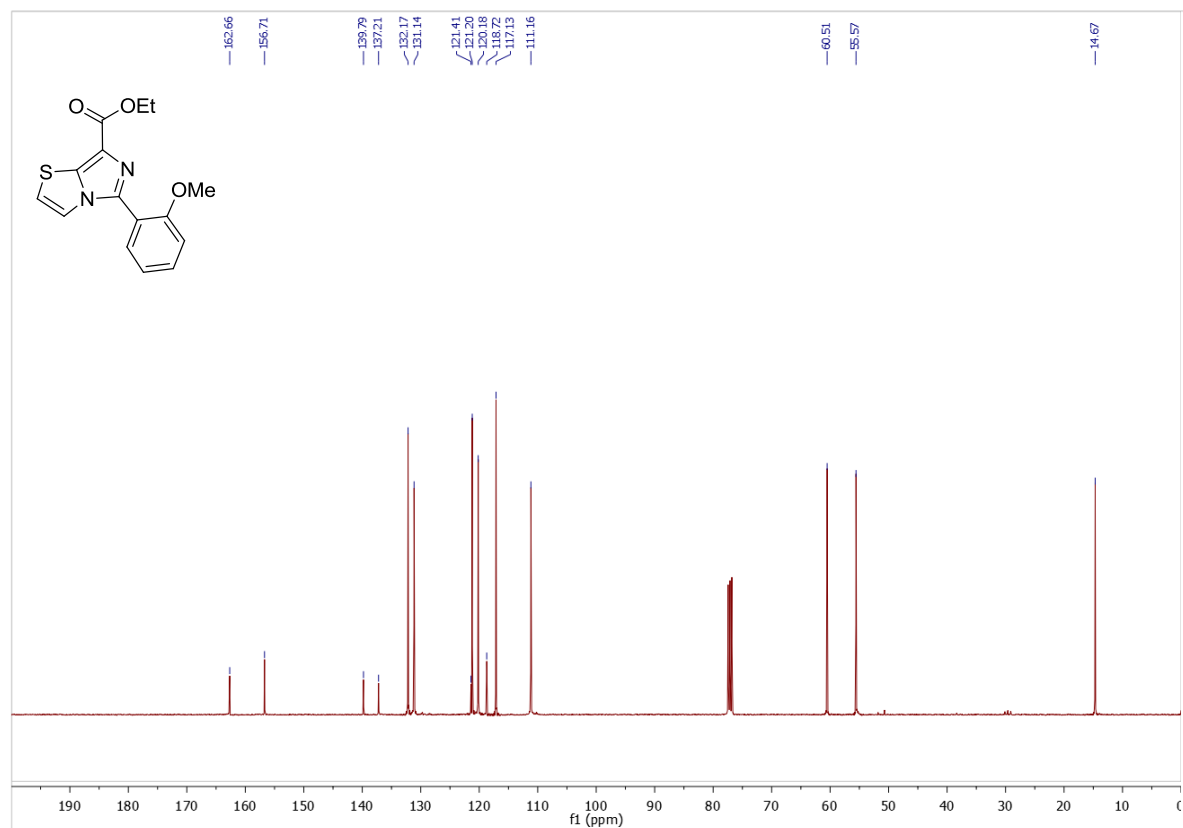

# Compound 3e

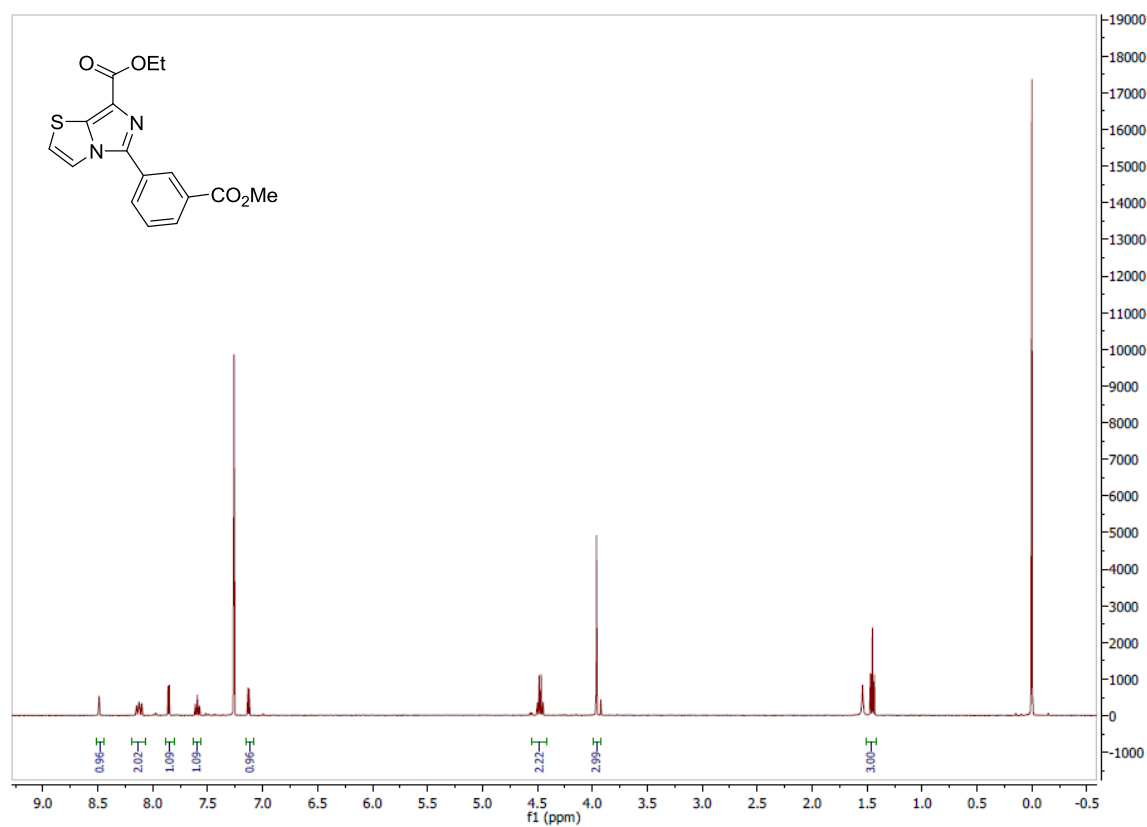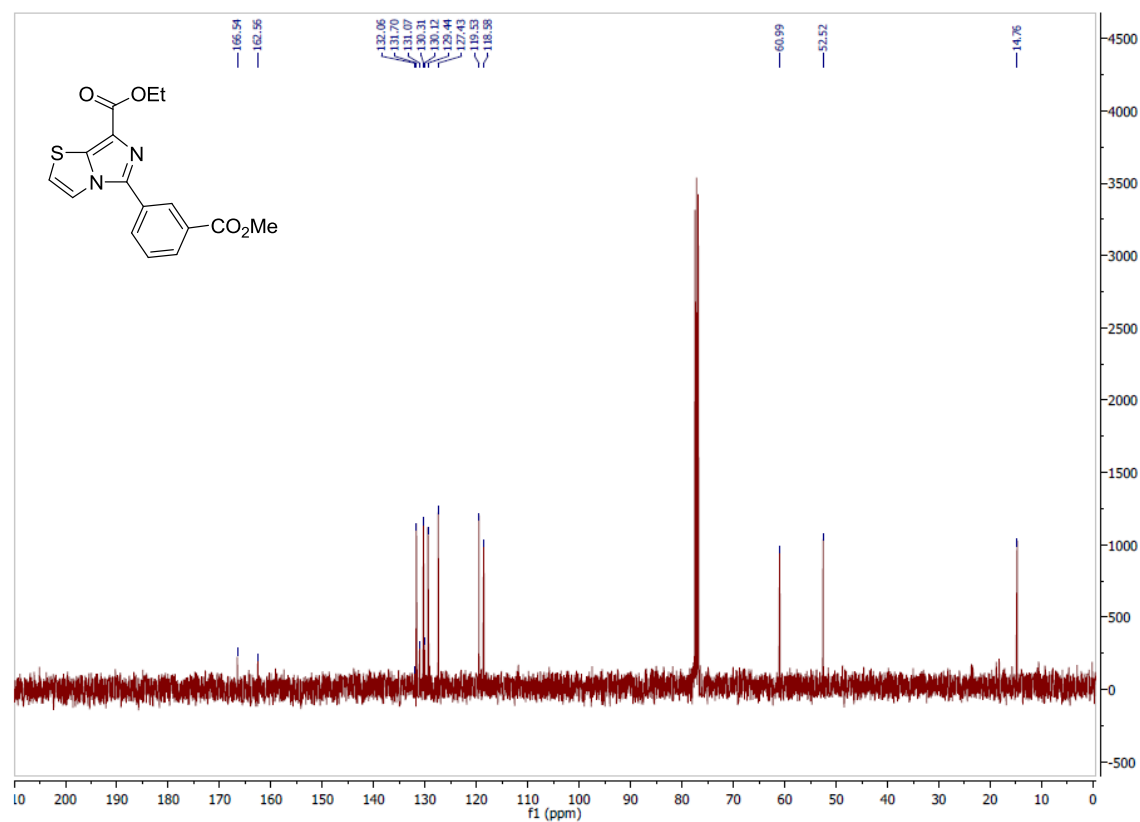

# Compound 3f

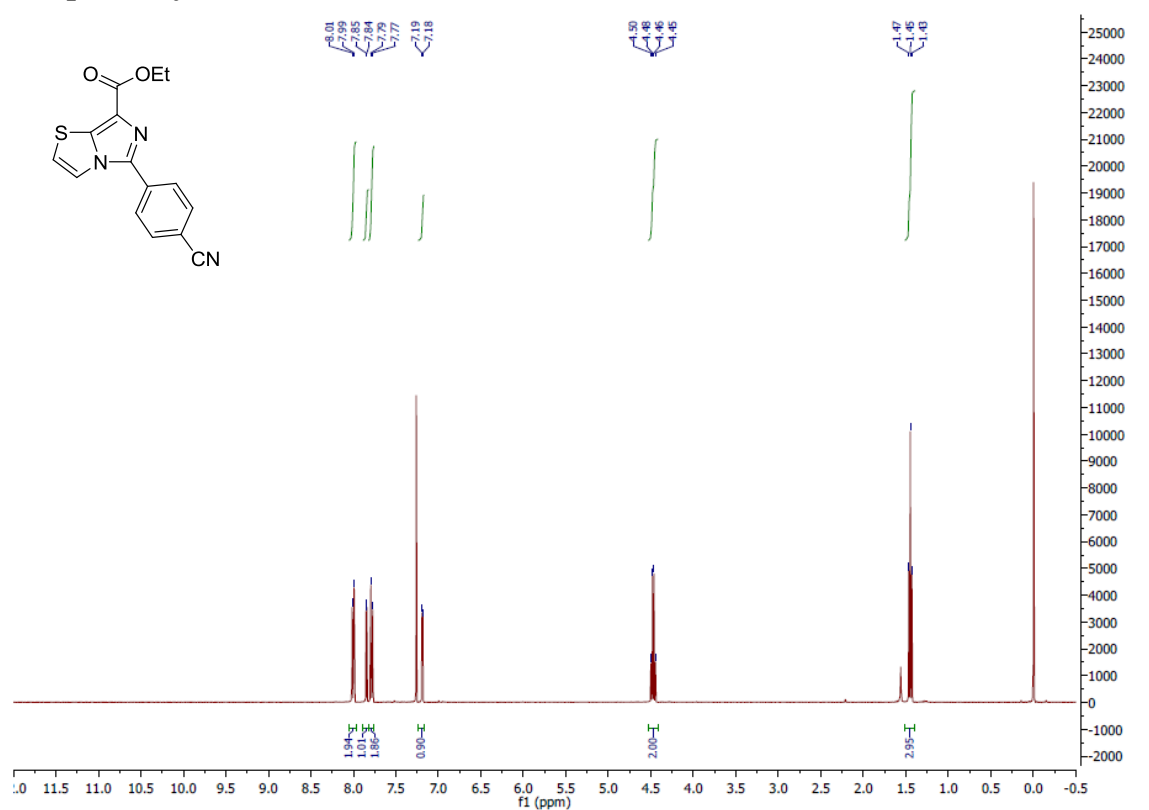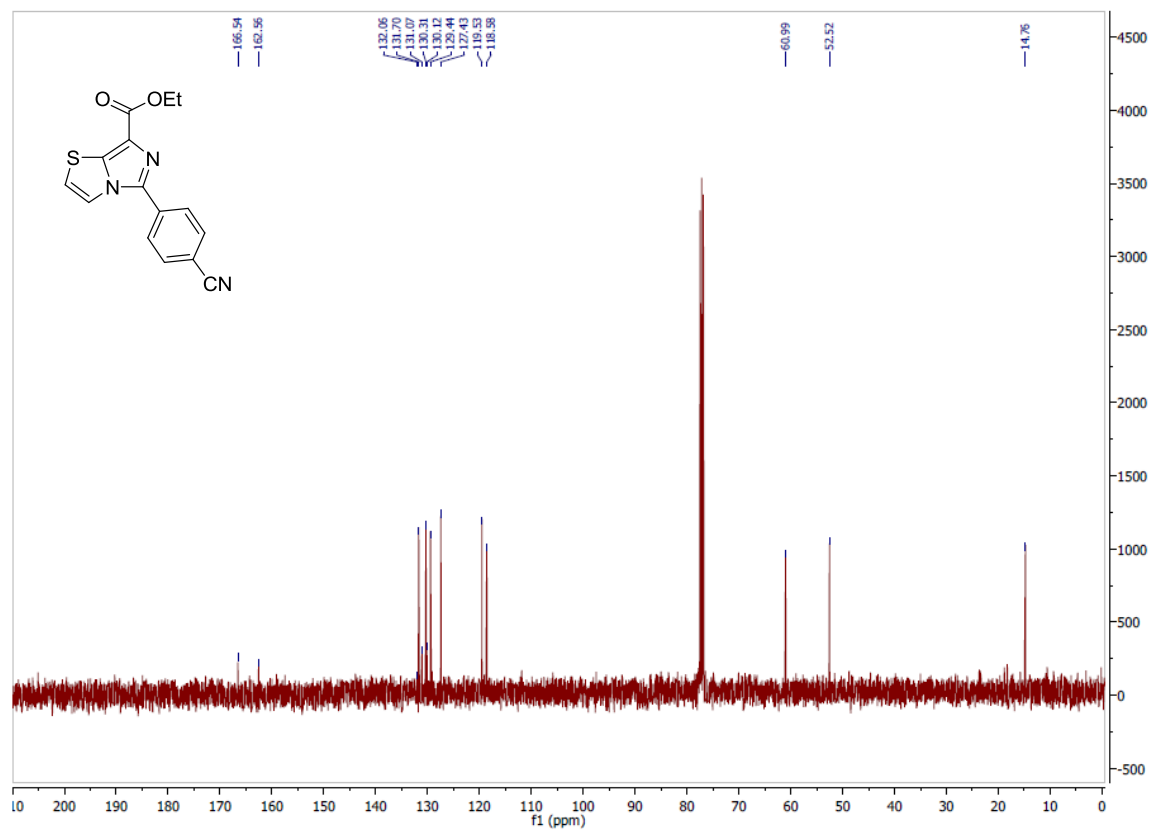

# Compound 3g

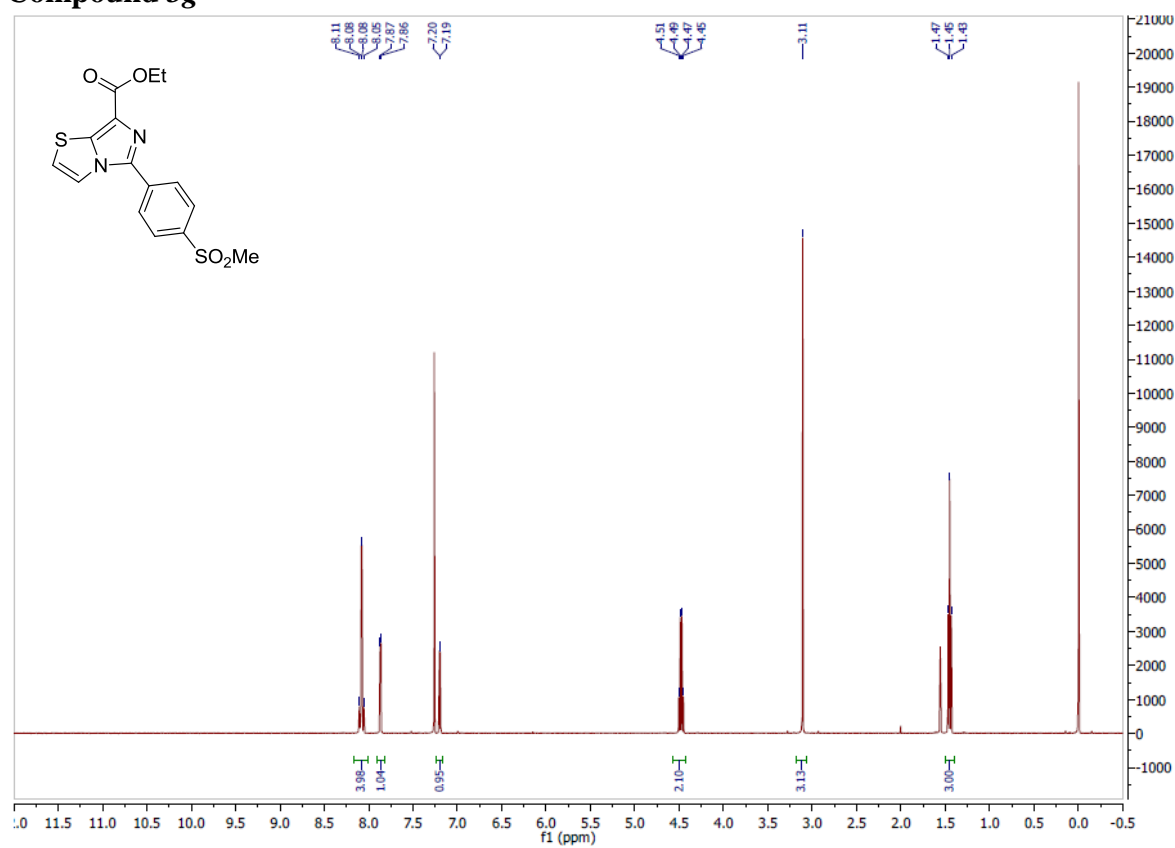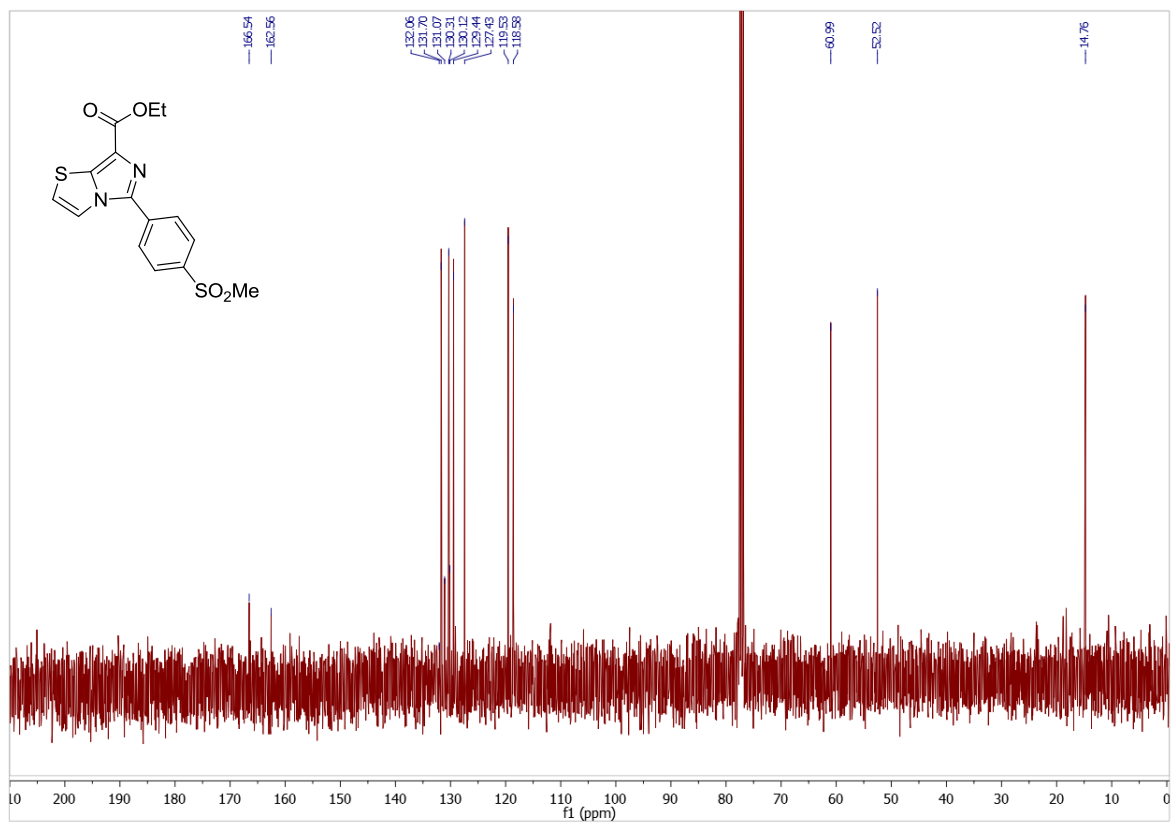

# Compound 3h

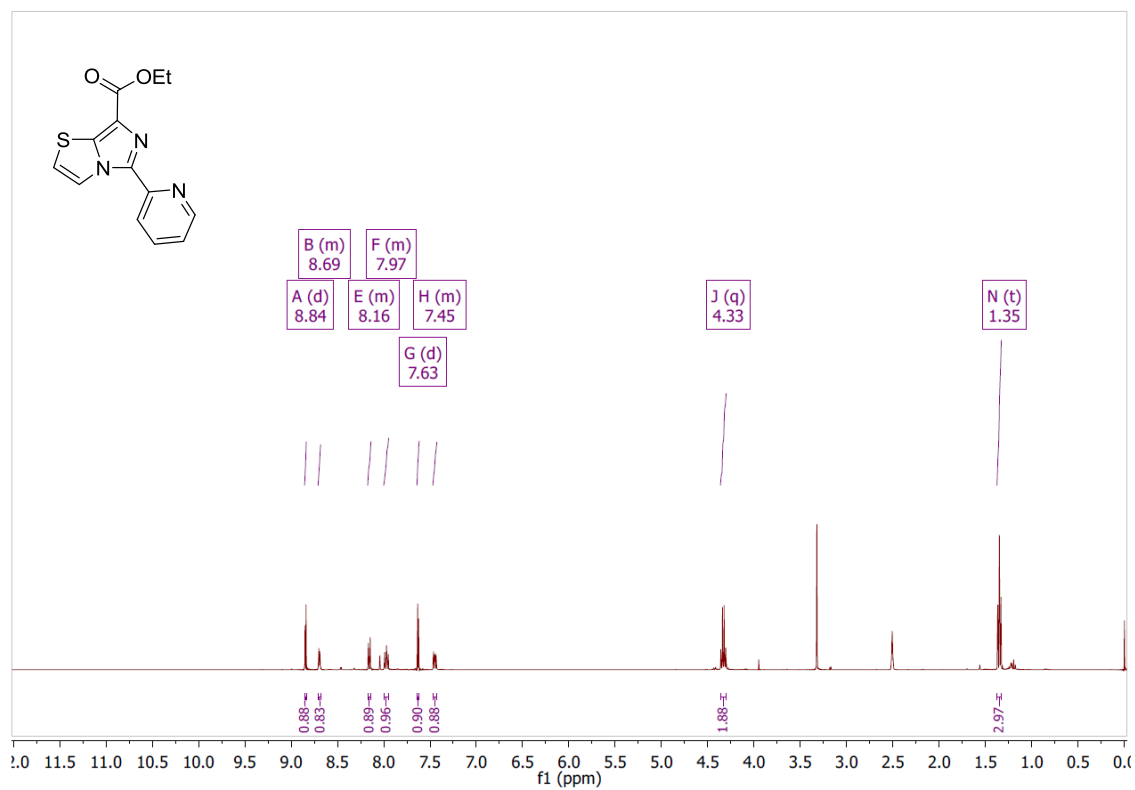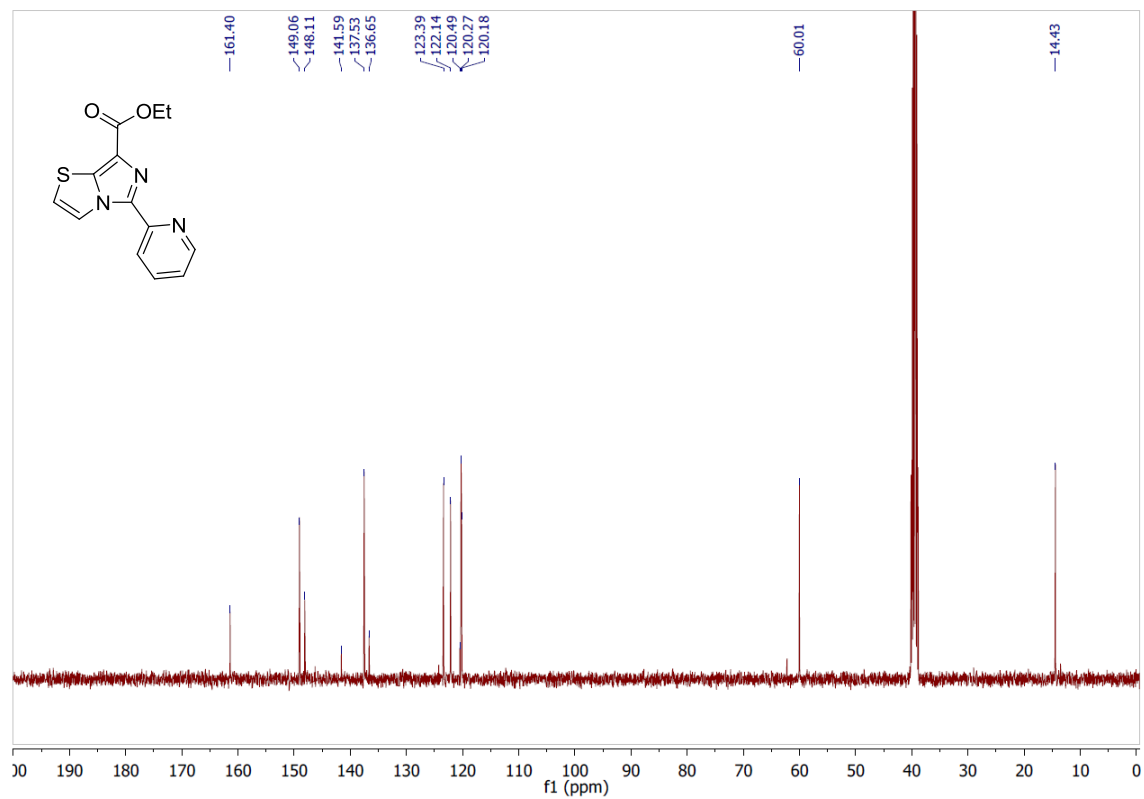

# Compound 3i

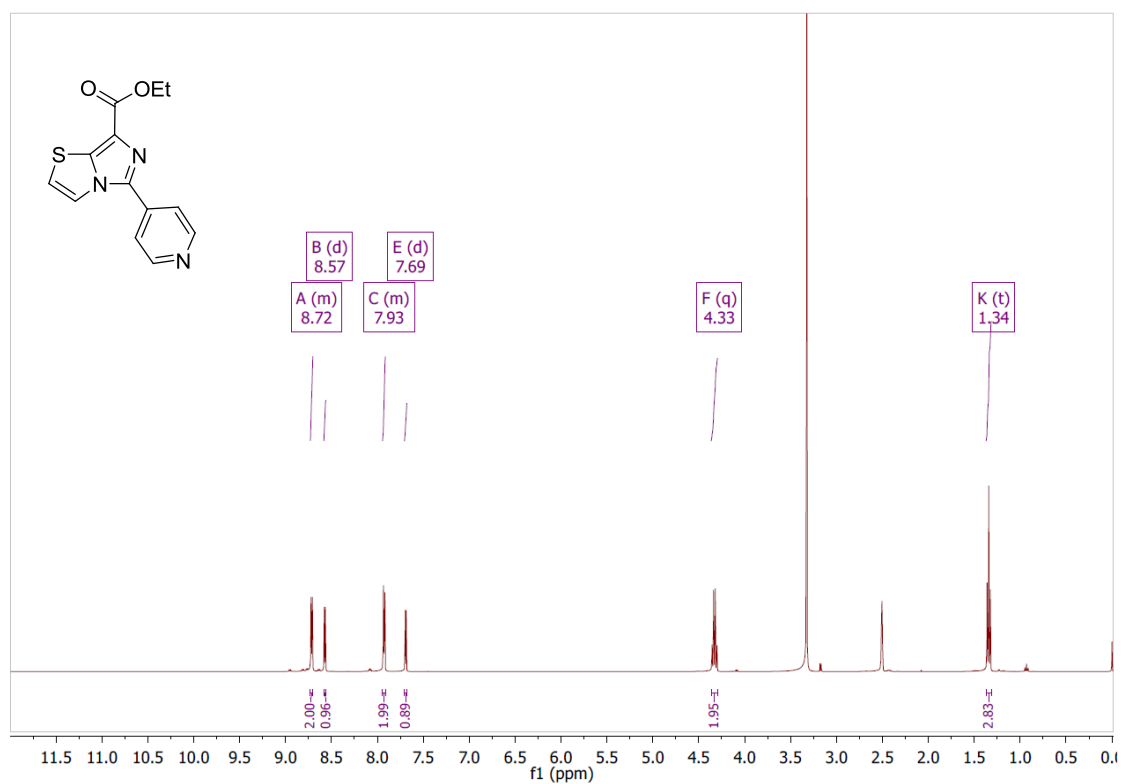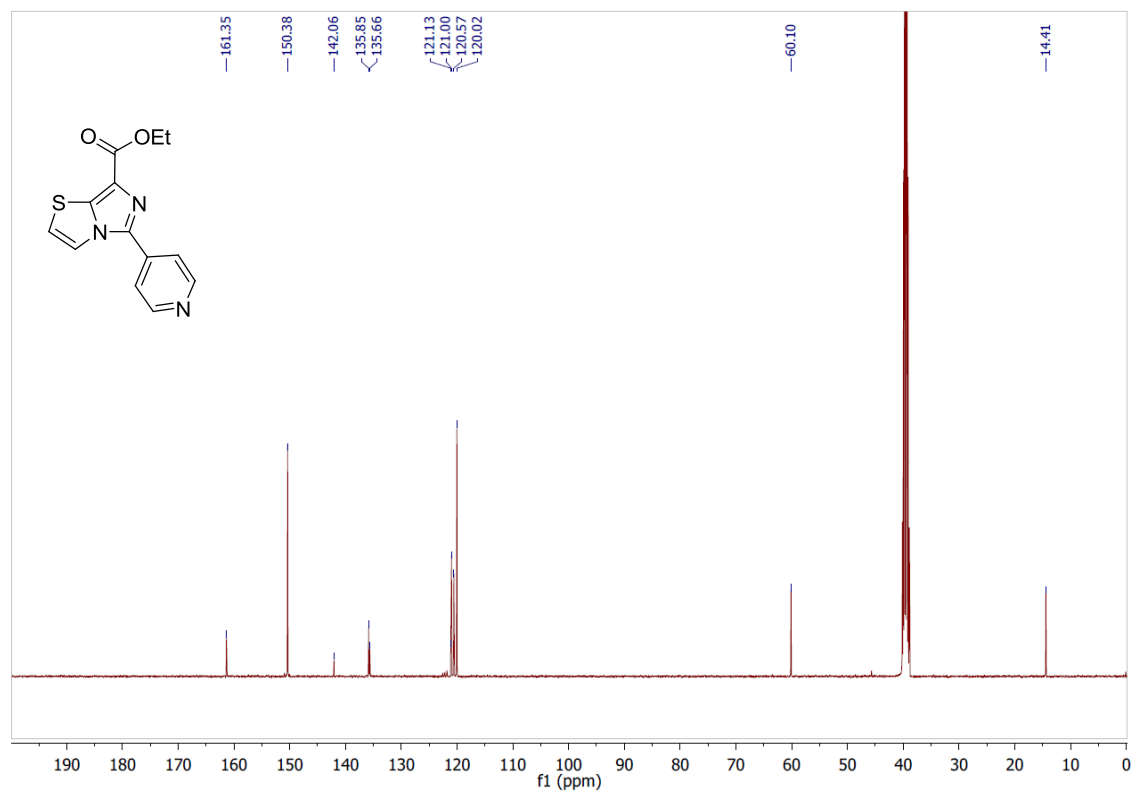



# Compound 3j

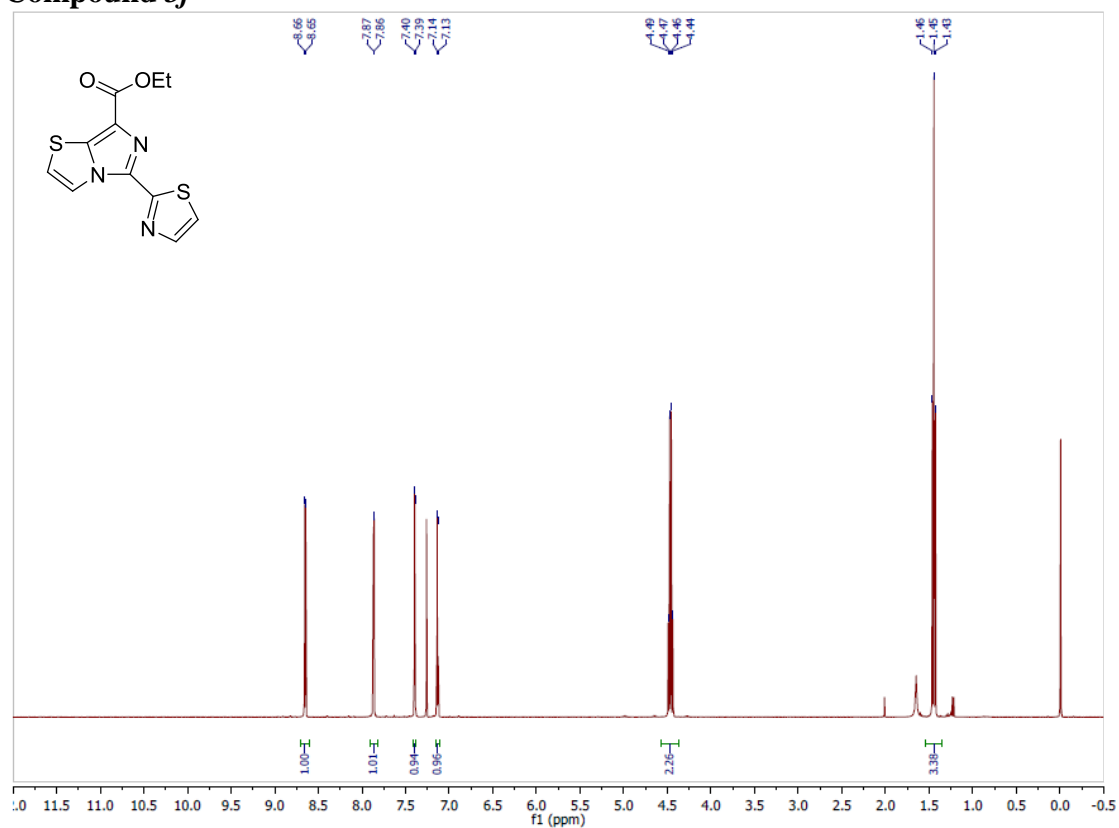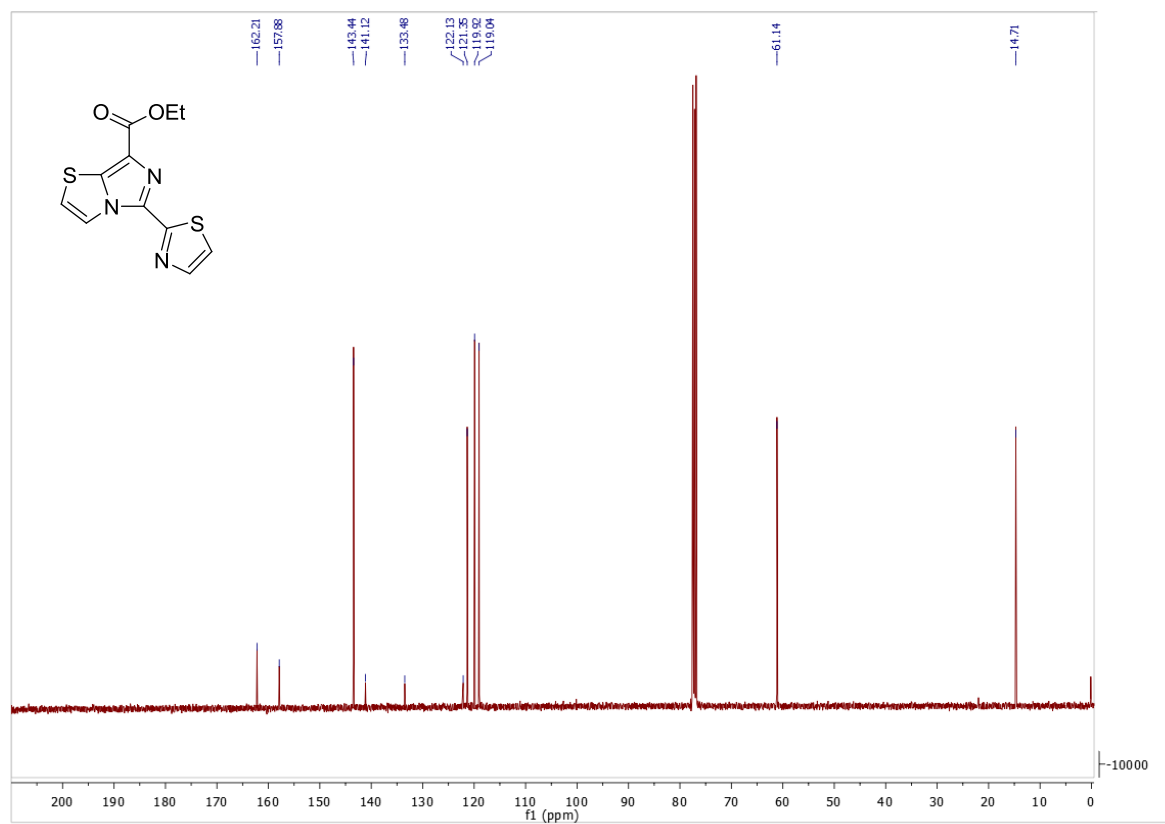

# Compound 3k

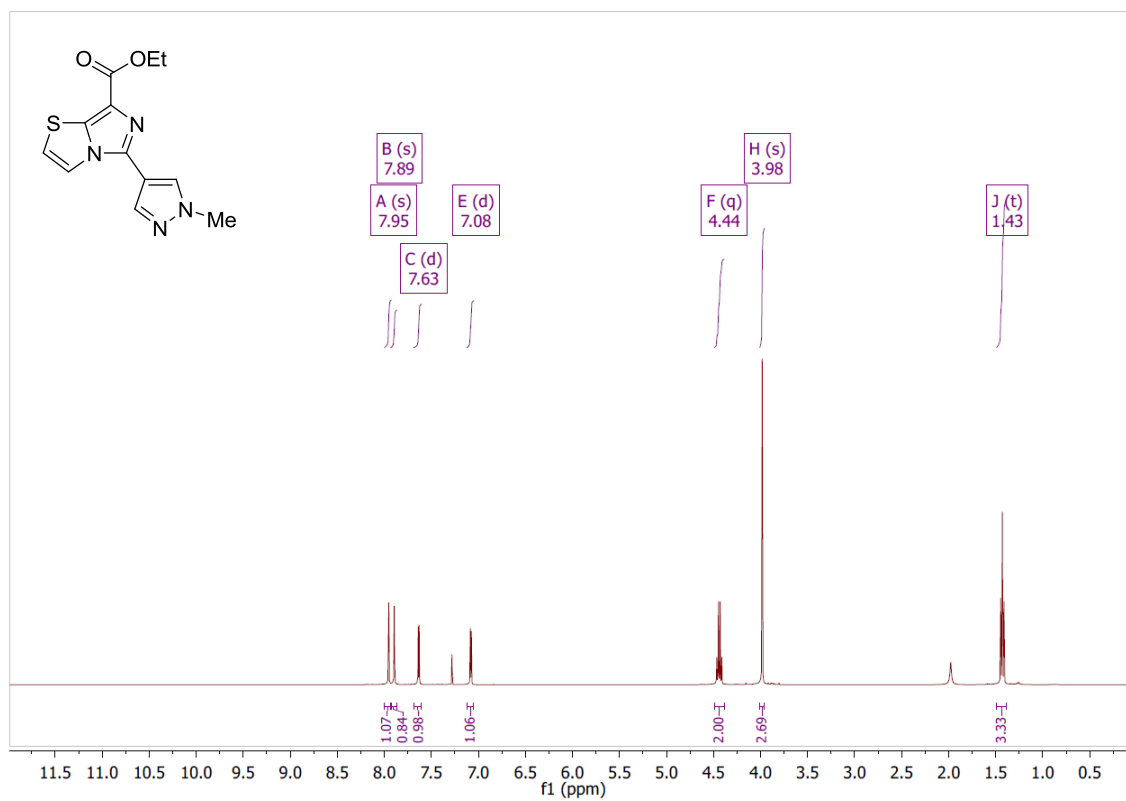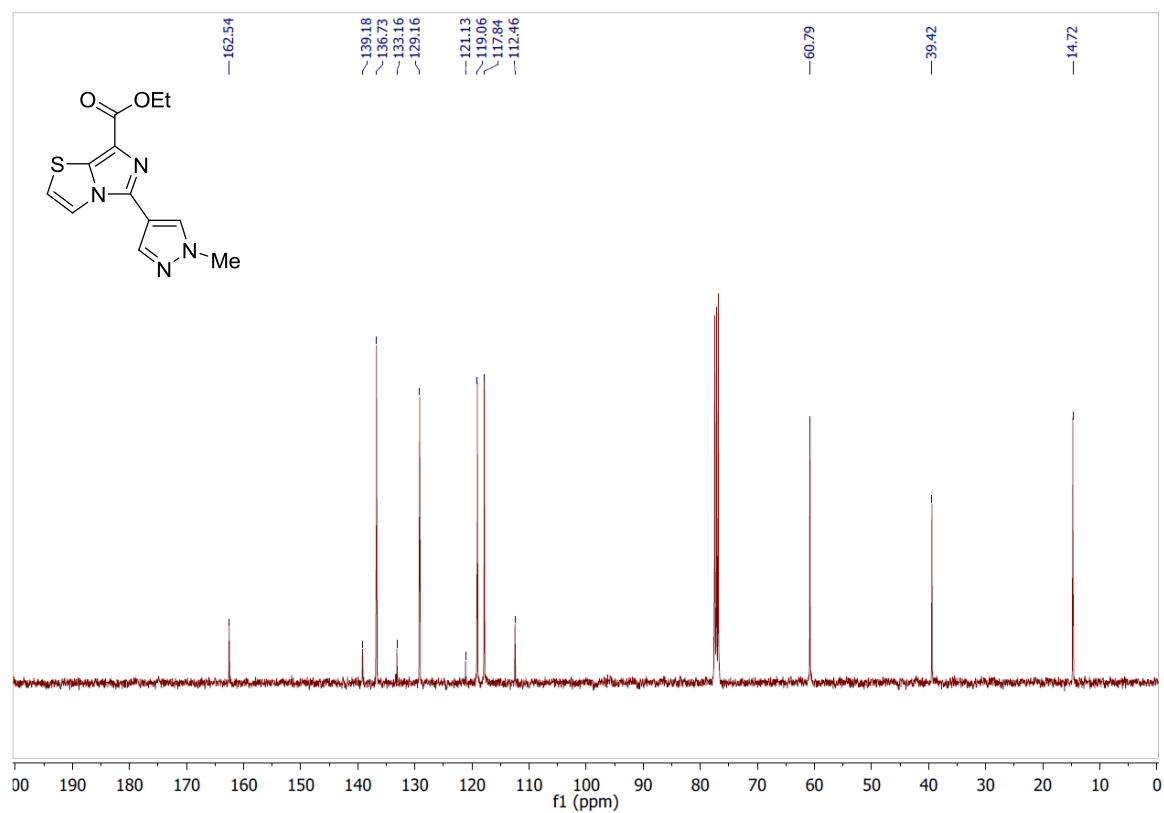

# Compound 3l

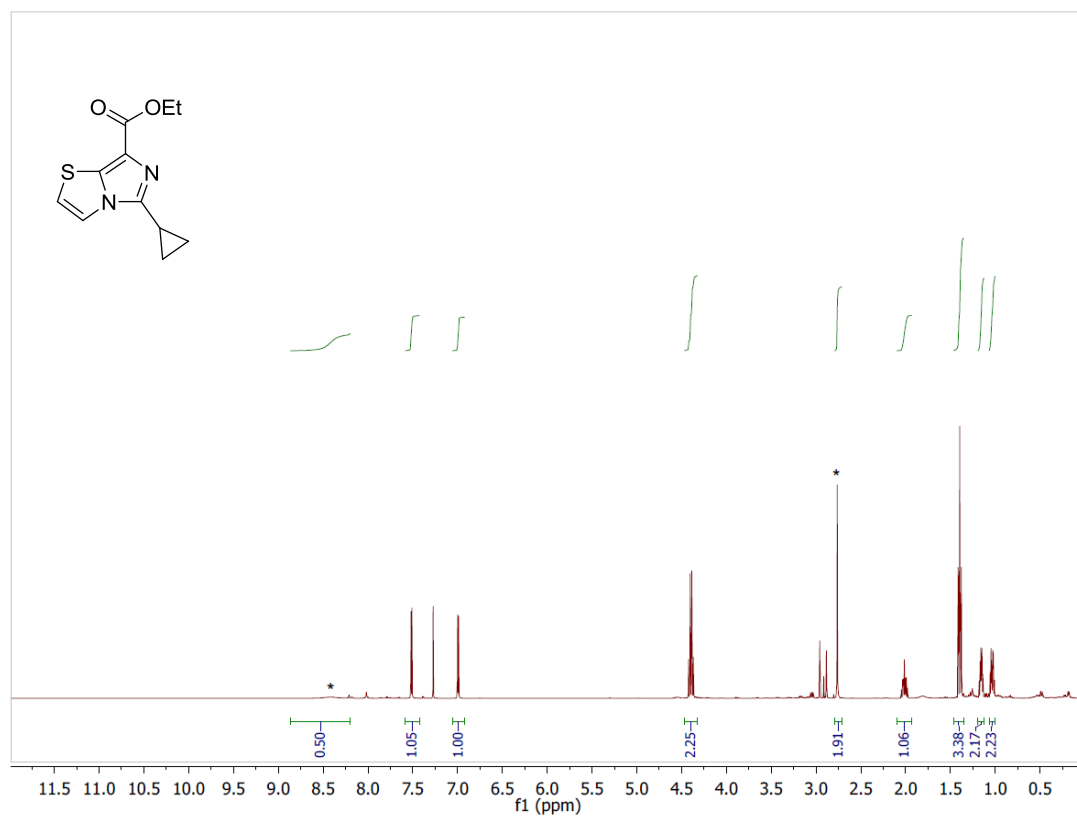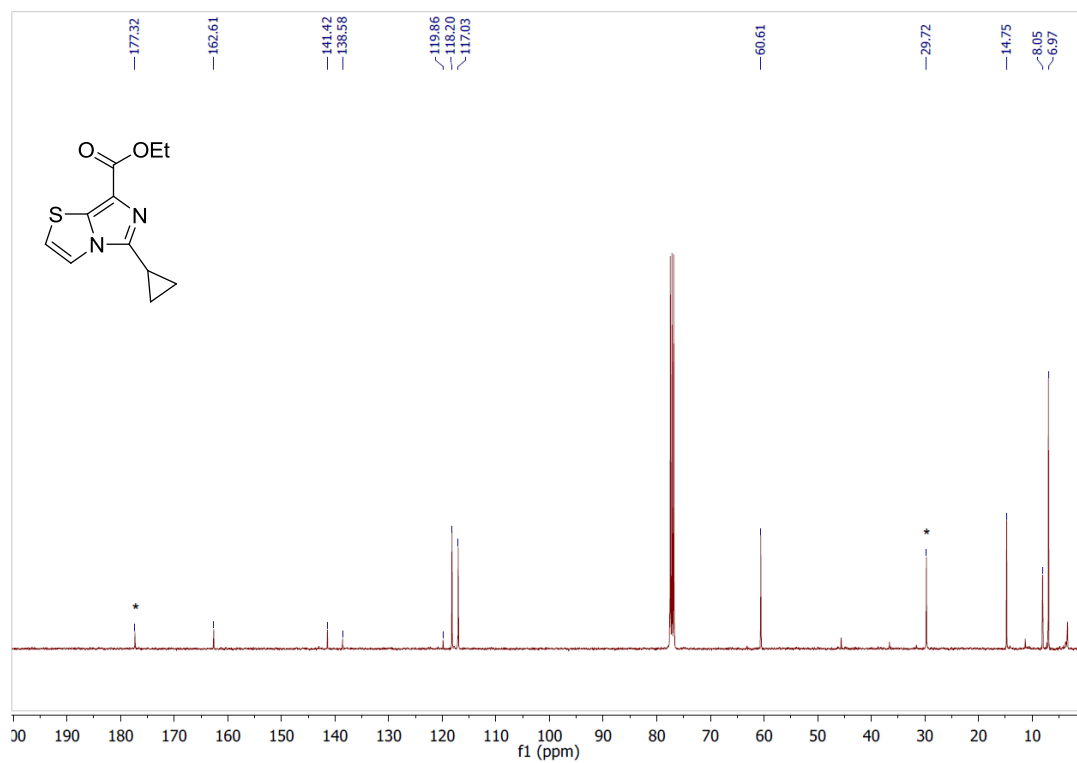

# Compound 3m

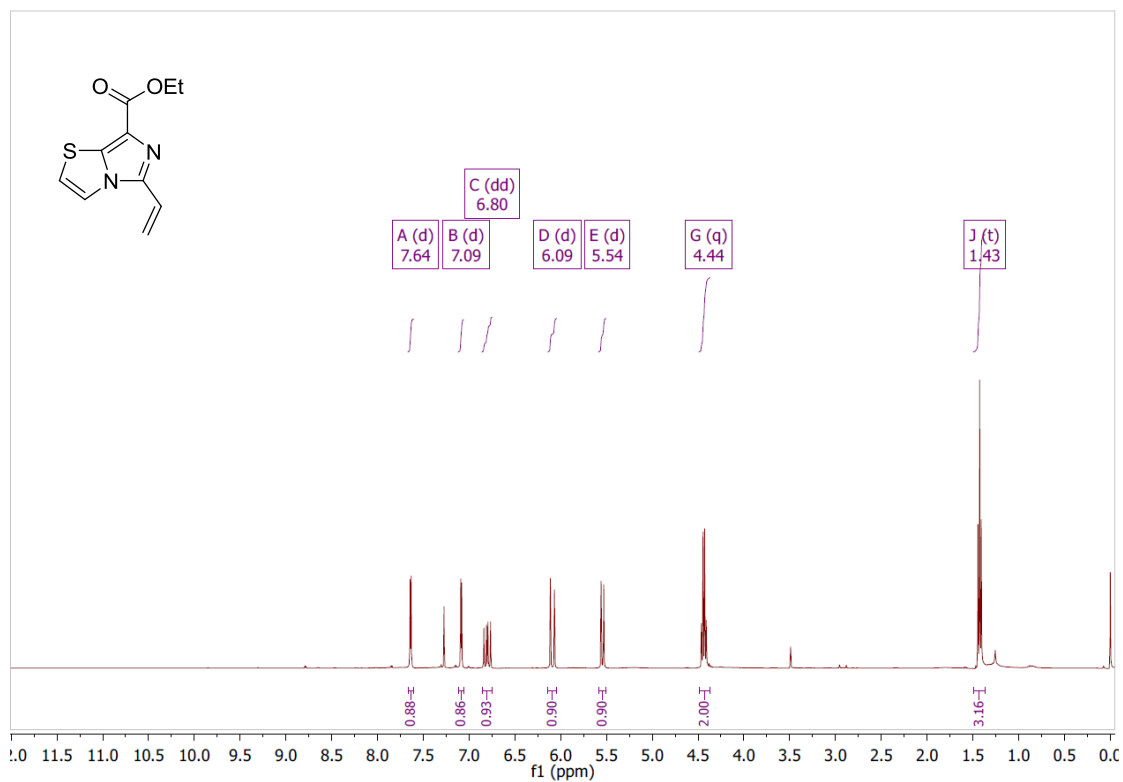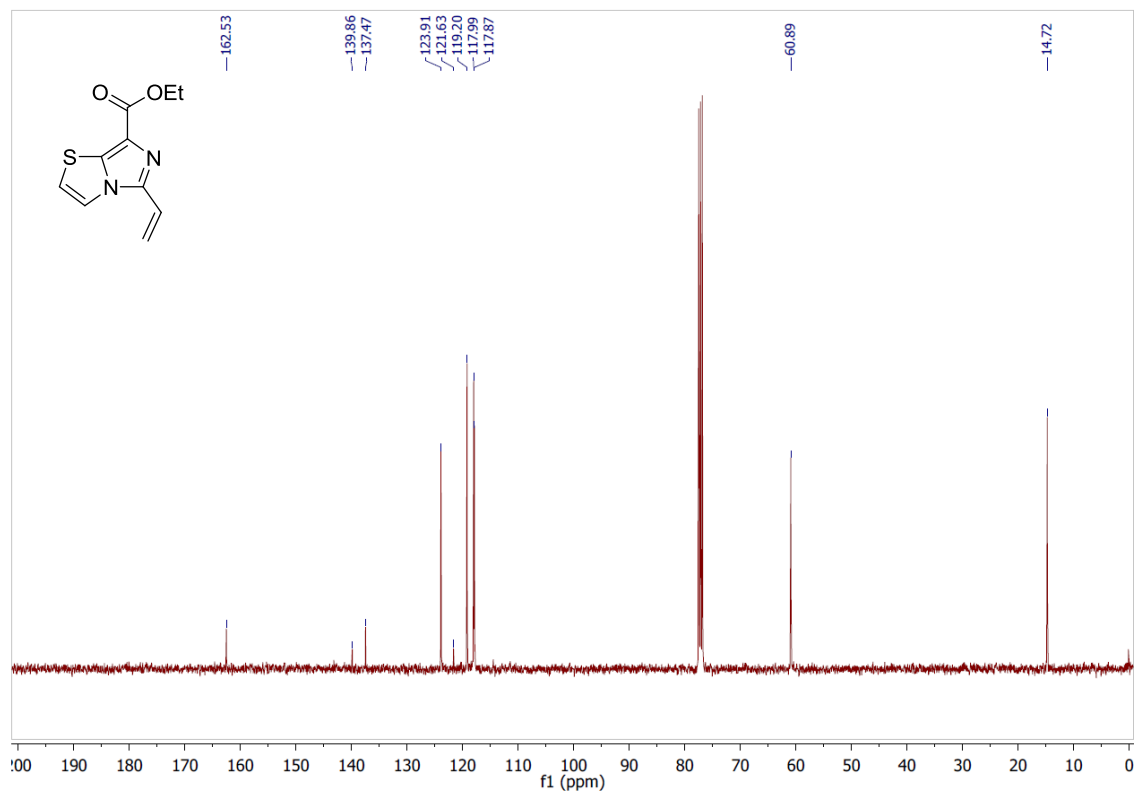

# Compound 4b

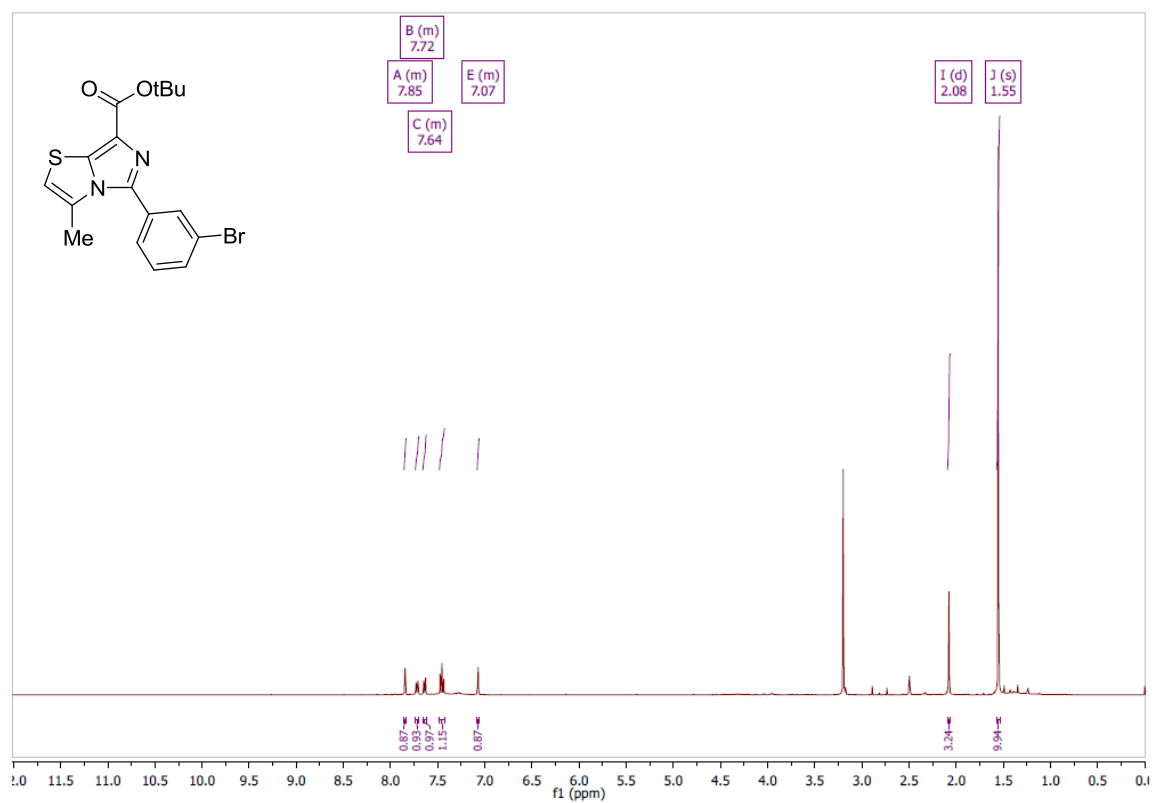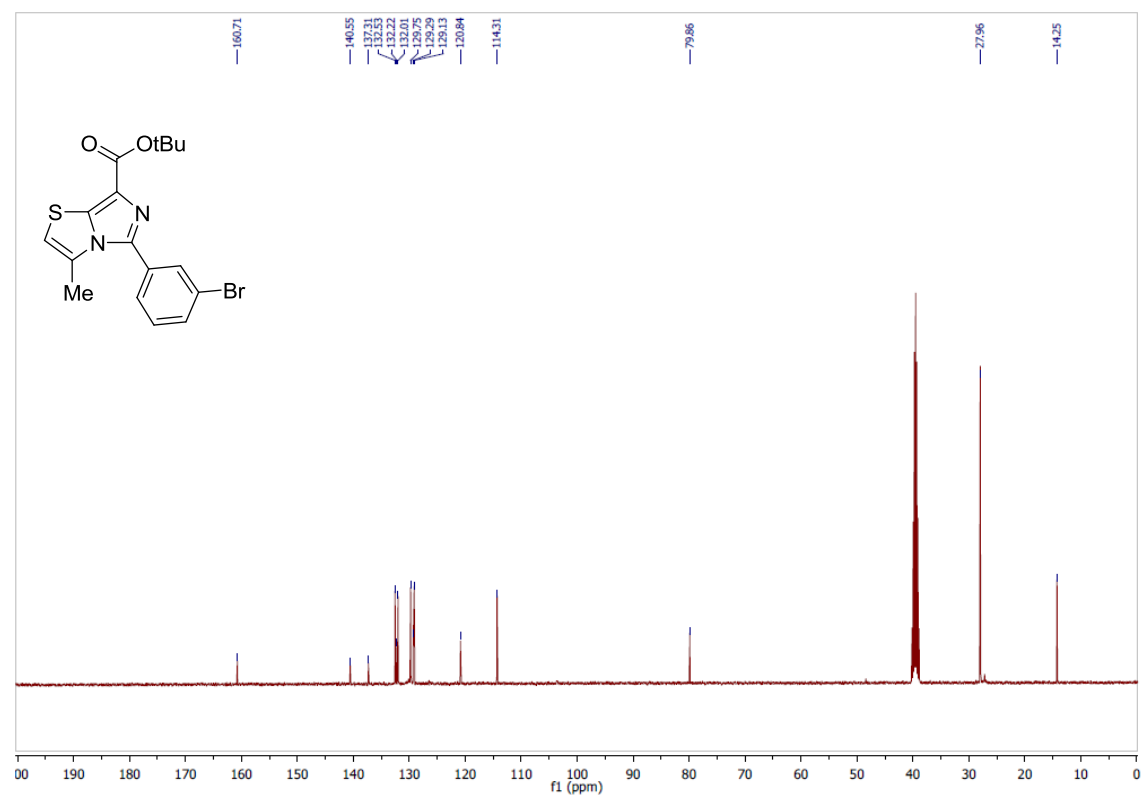

# Compound 4c

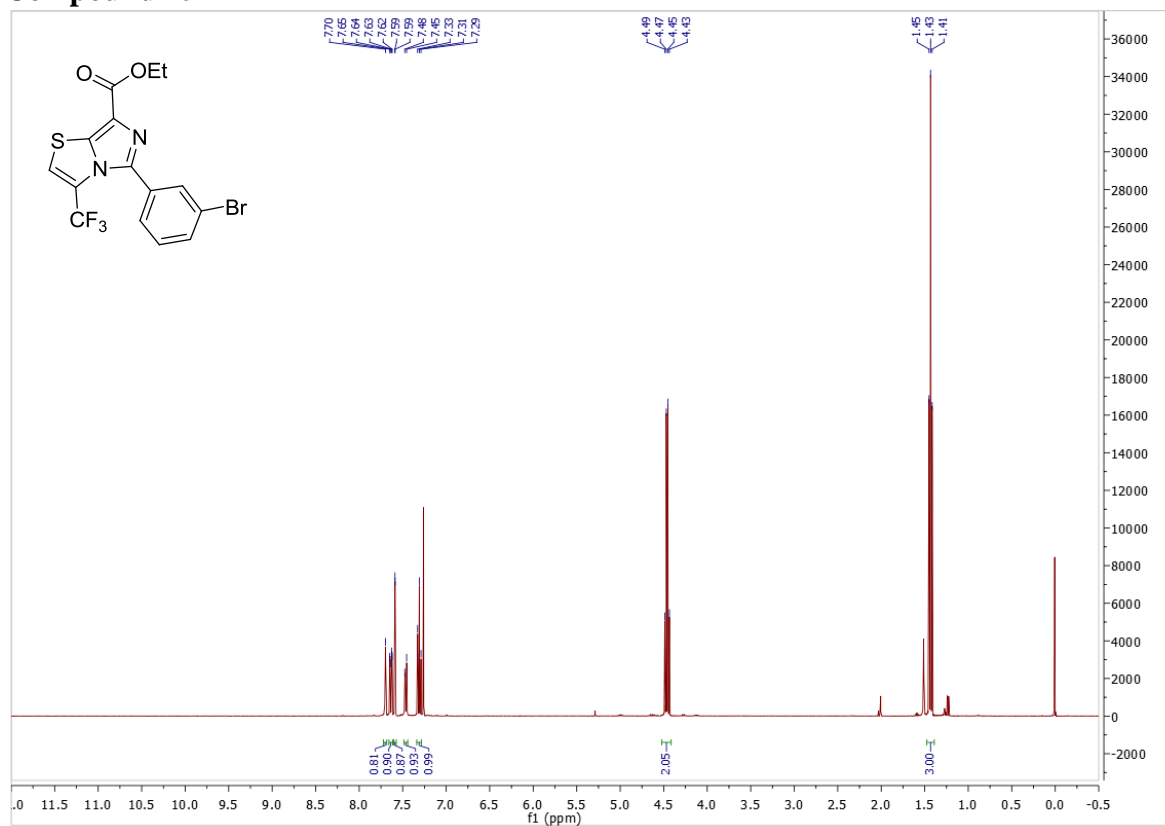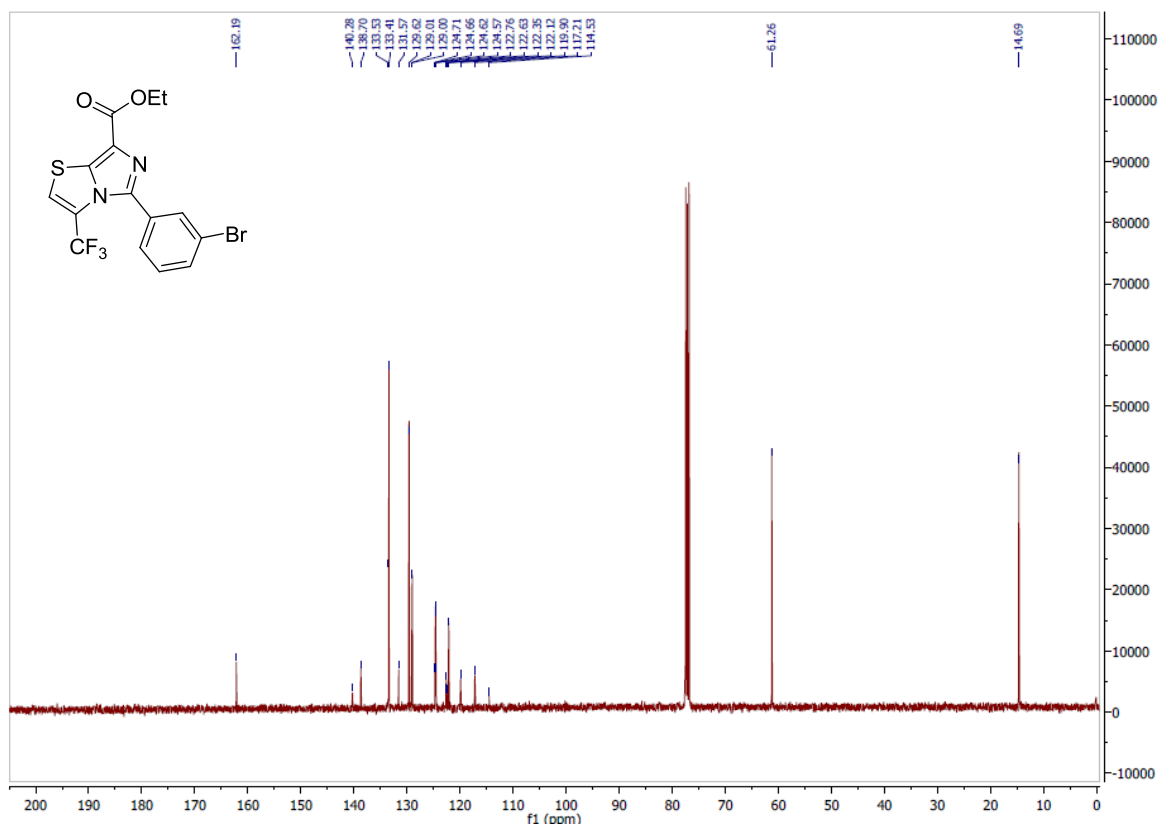

# Compound 4d

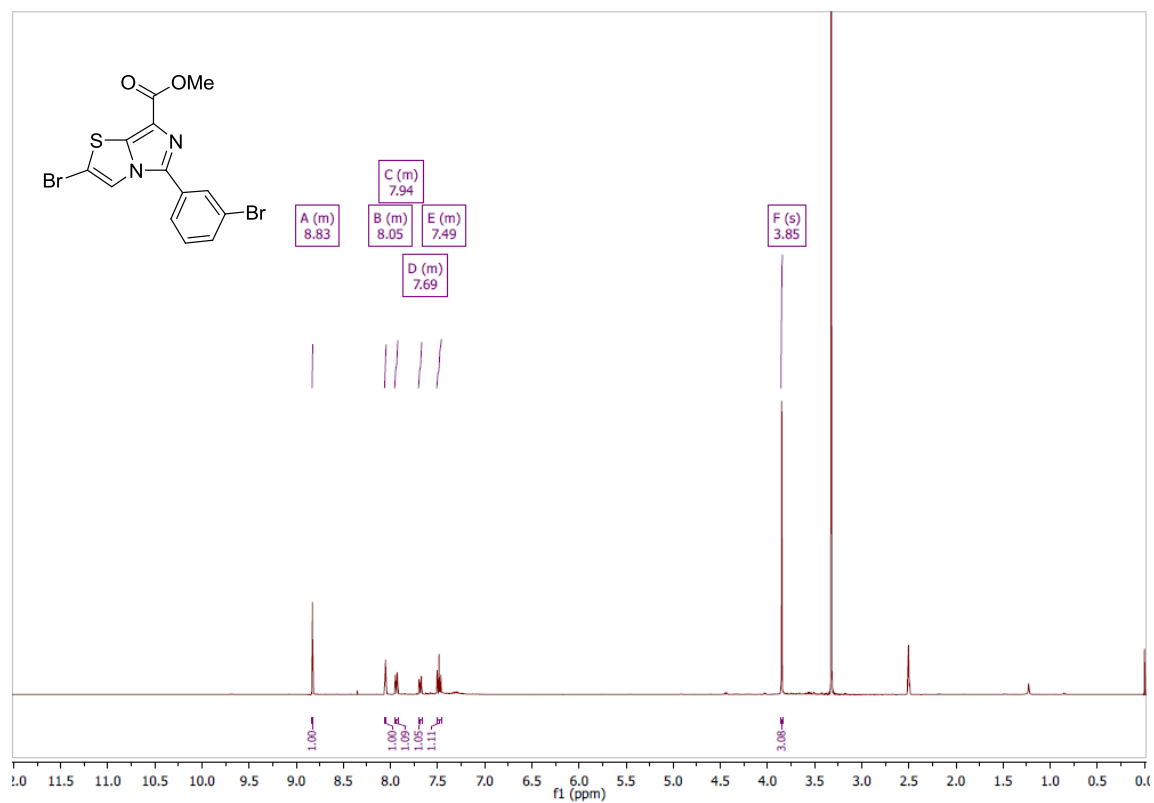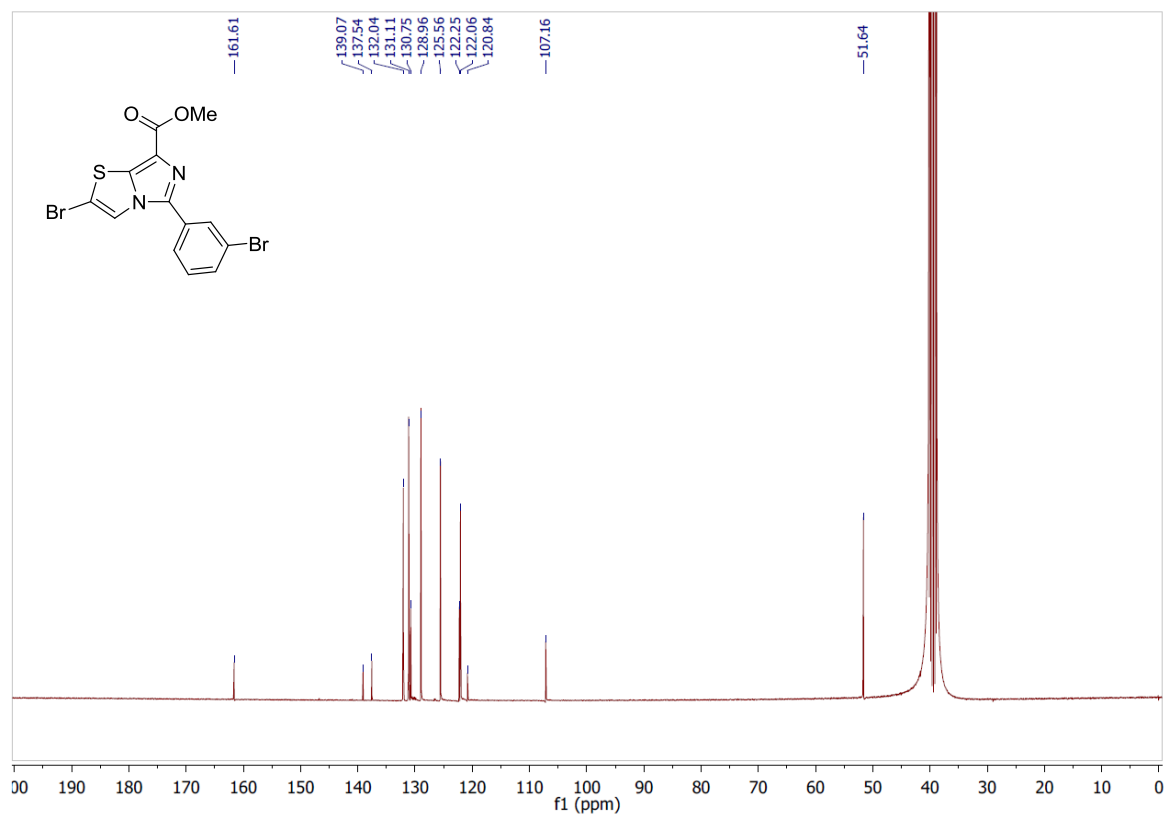

# Compound 4e

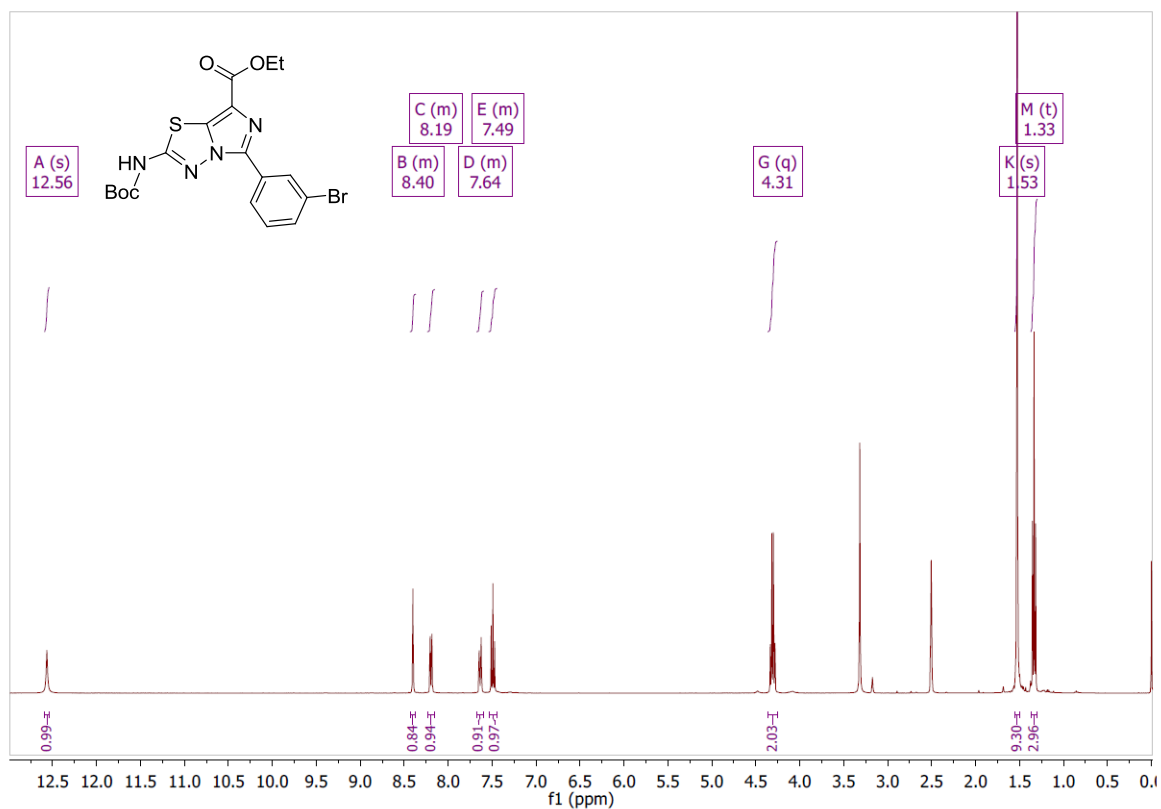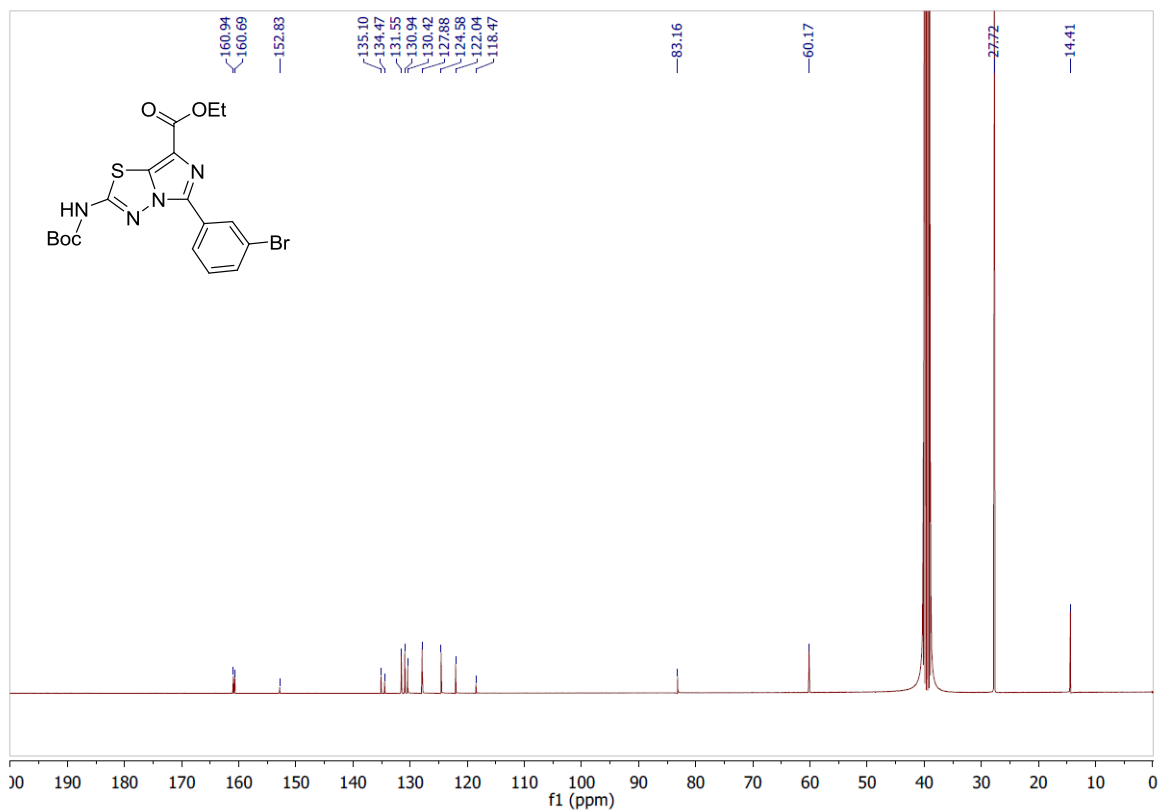



# Compound 4f

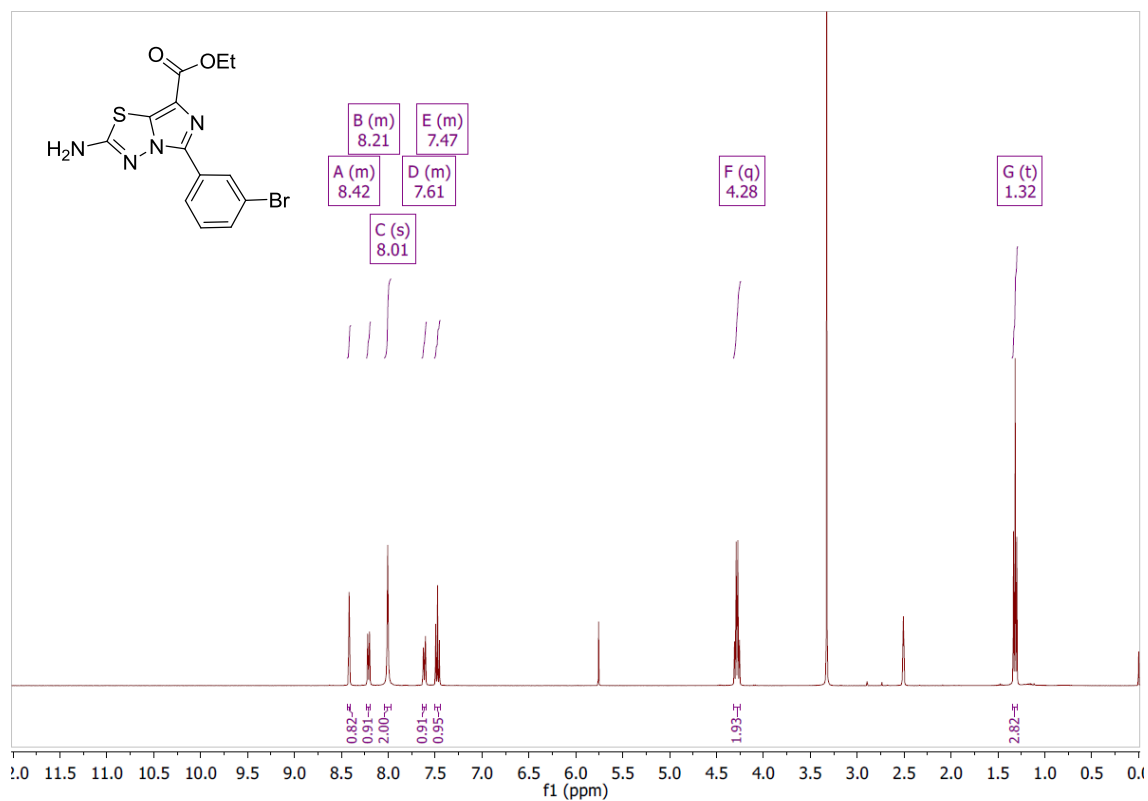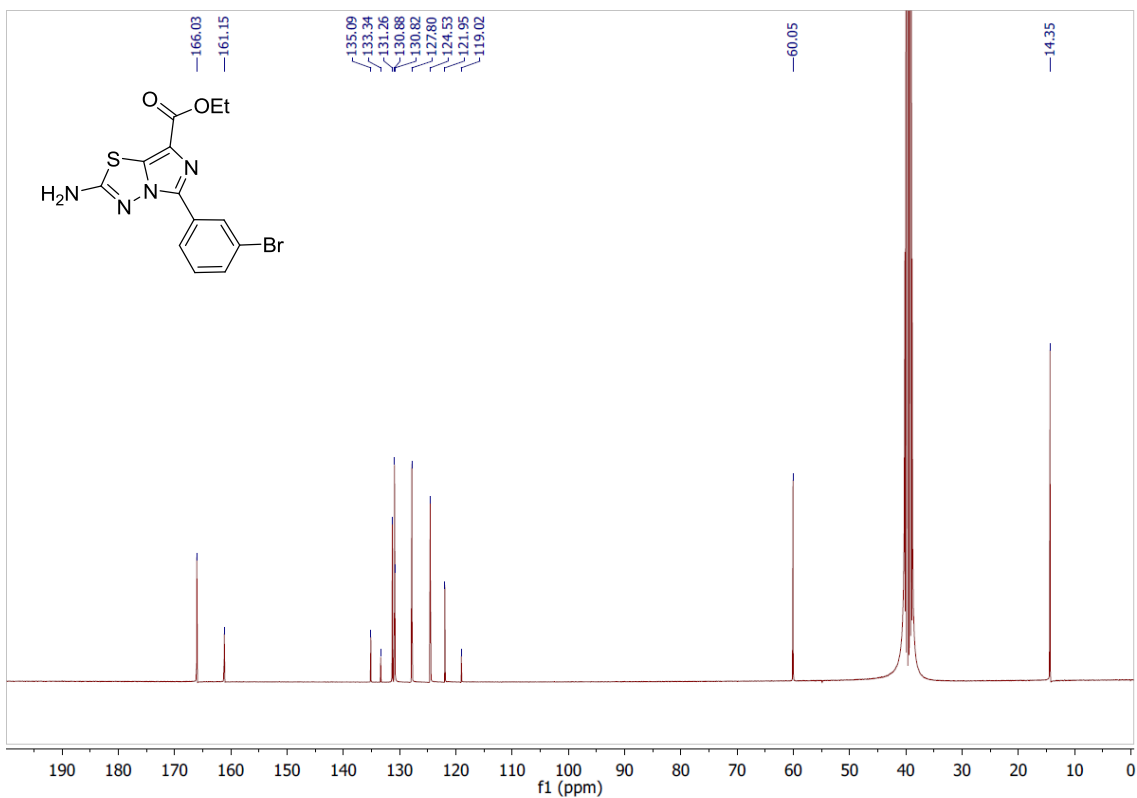

# Compound 4g

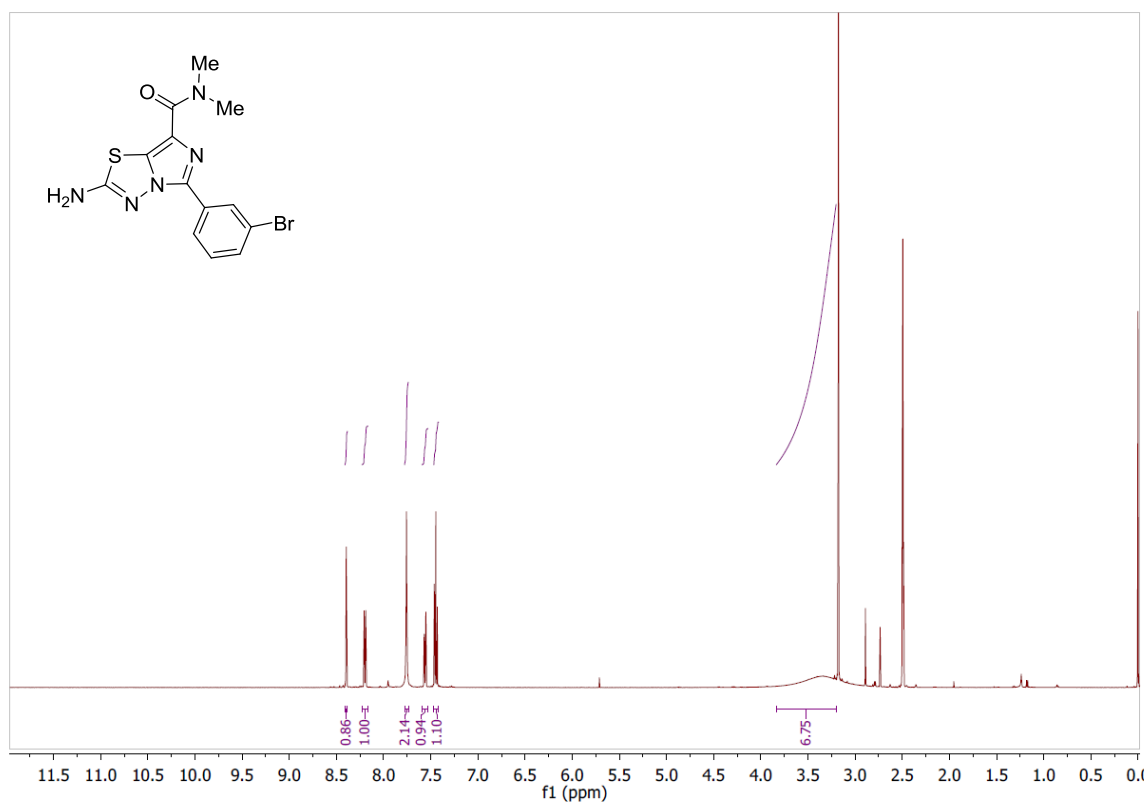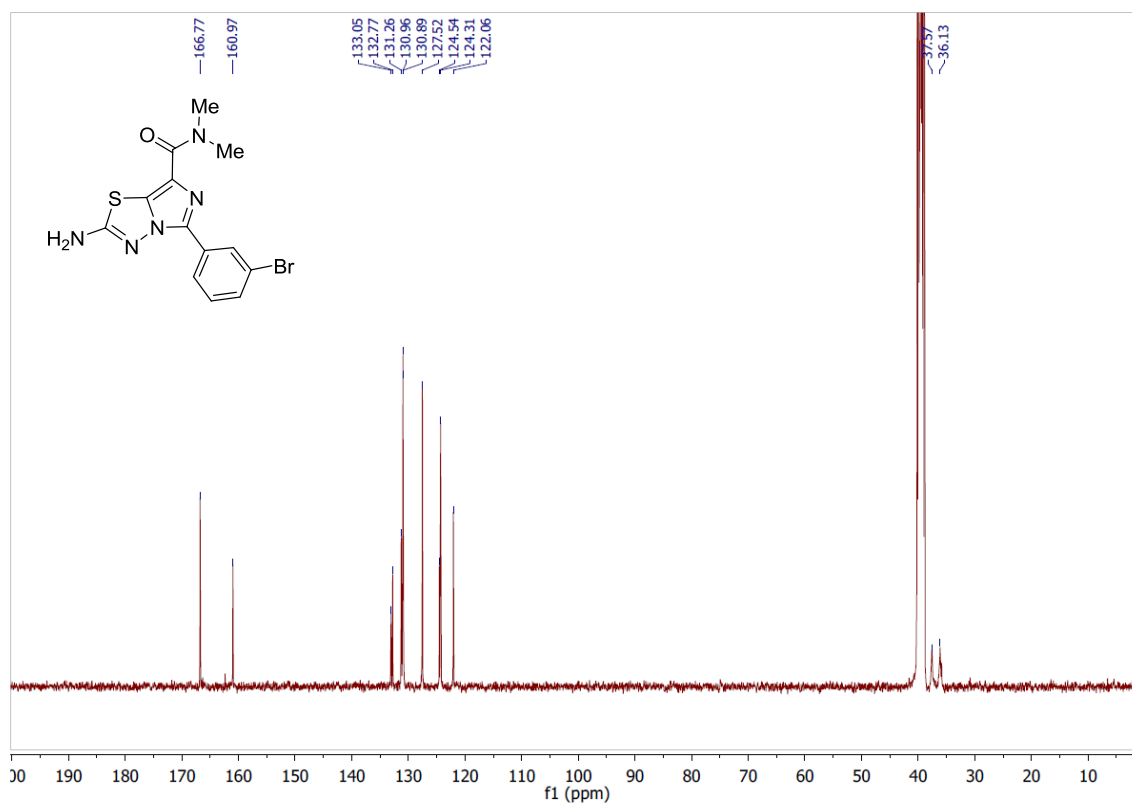

# Compound 4h

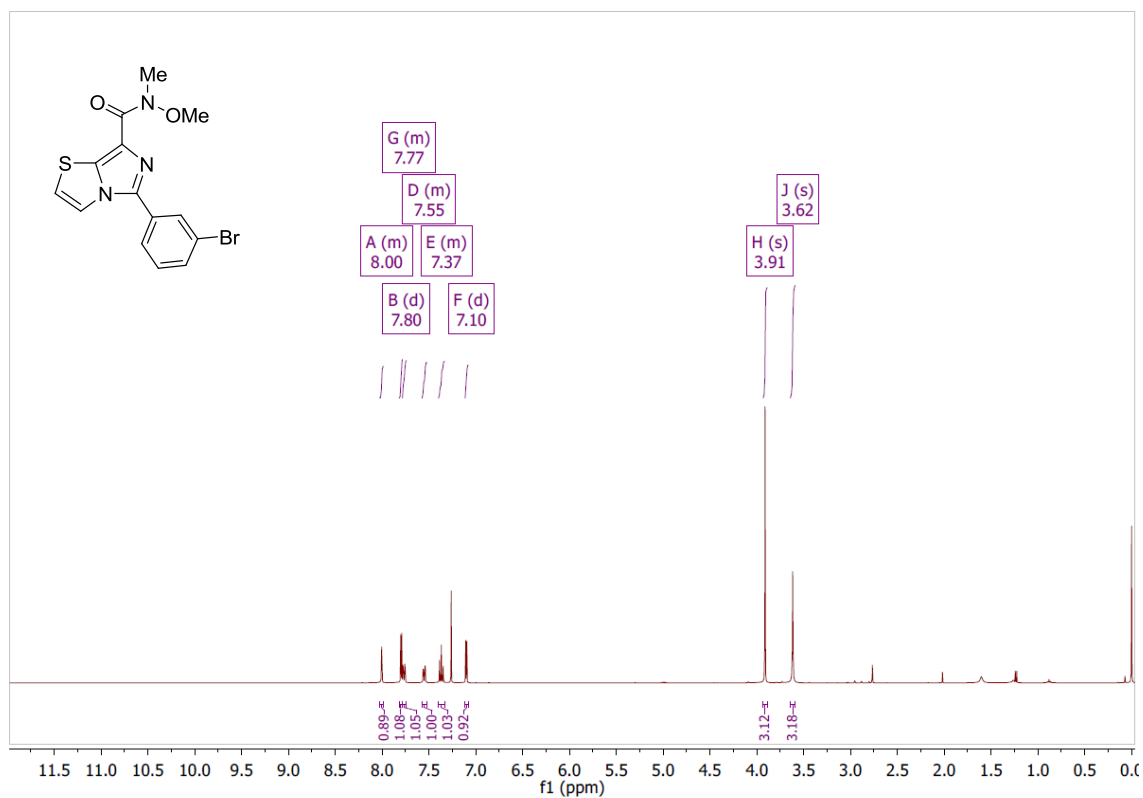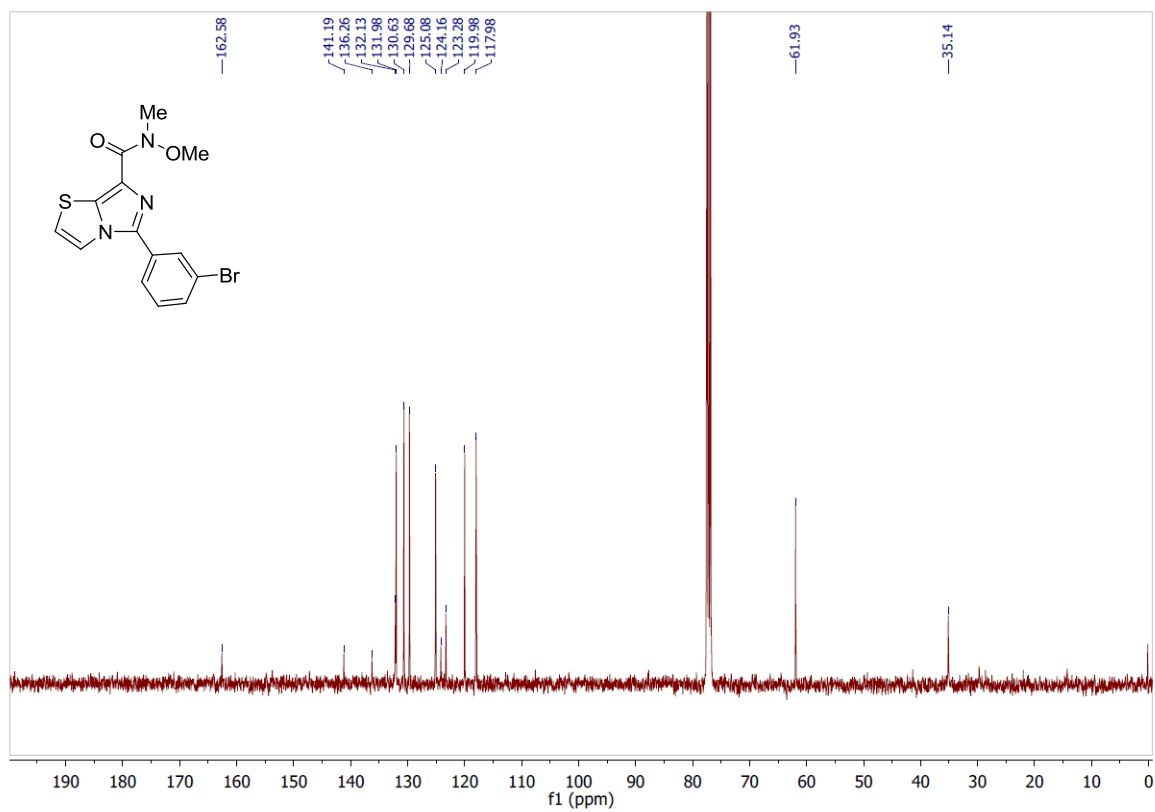

# Compound 4i

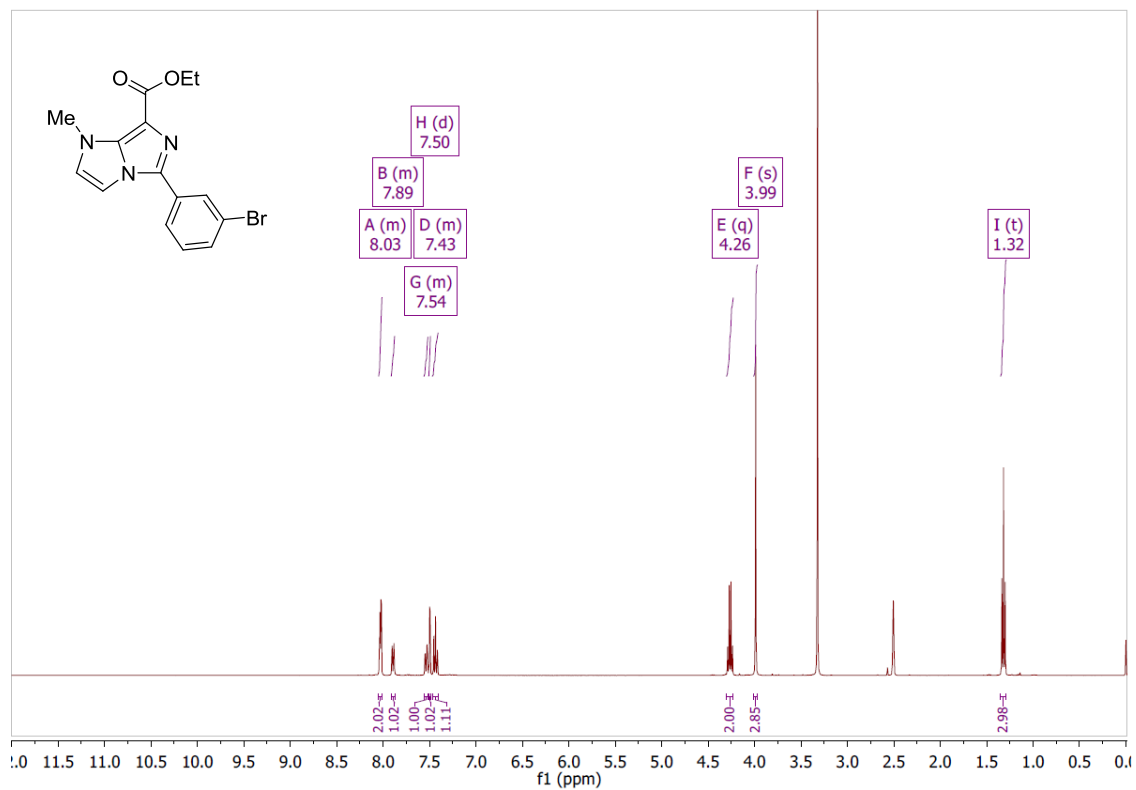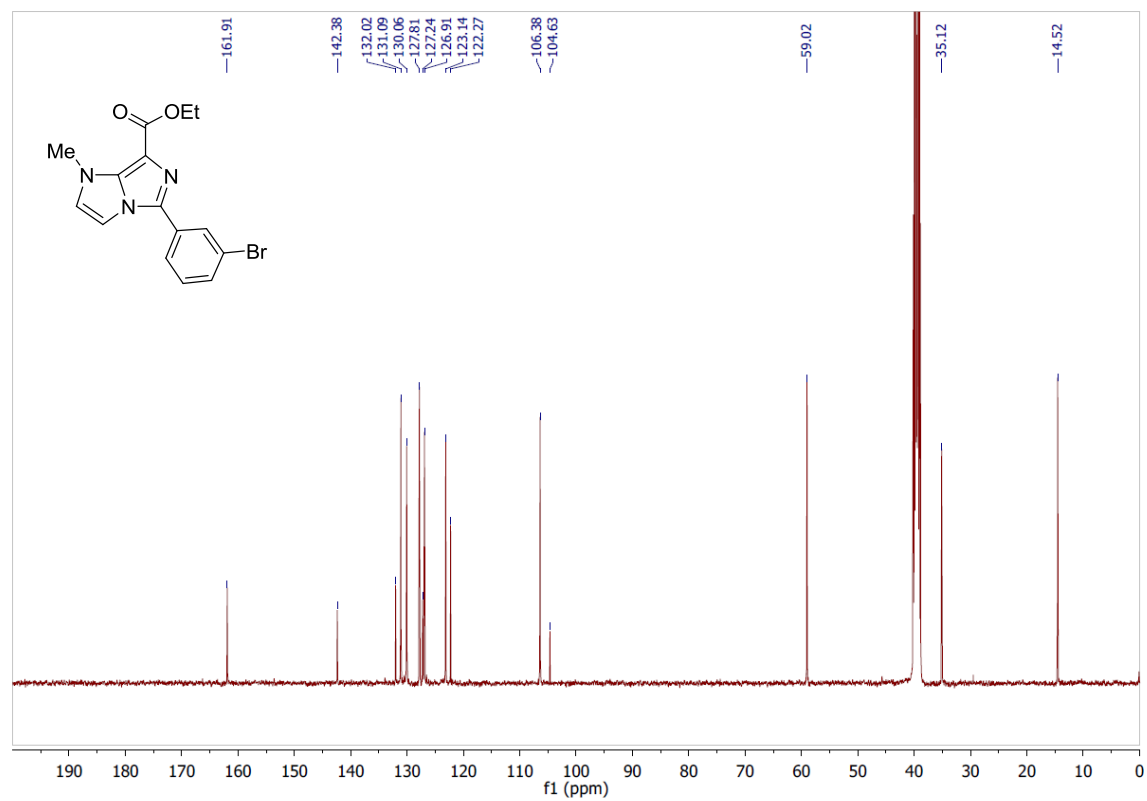

# Compound 4j

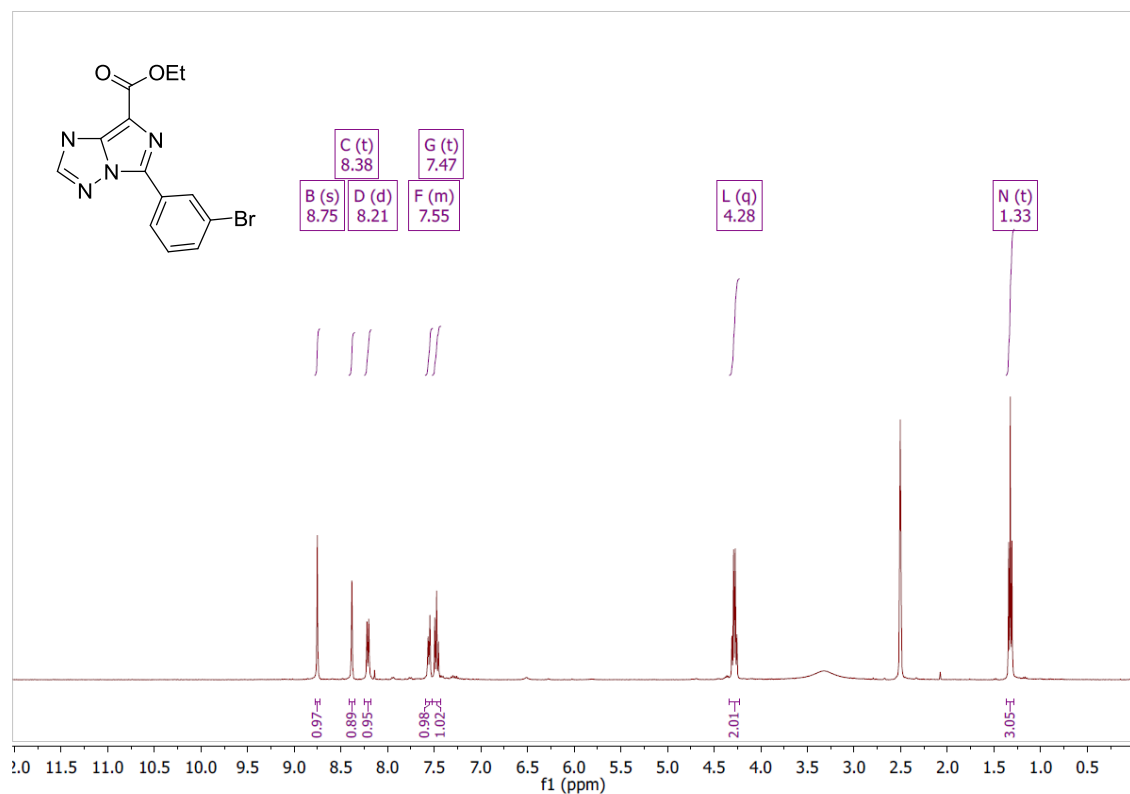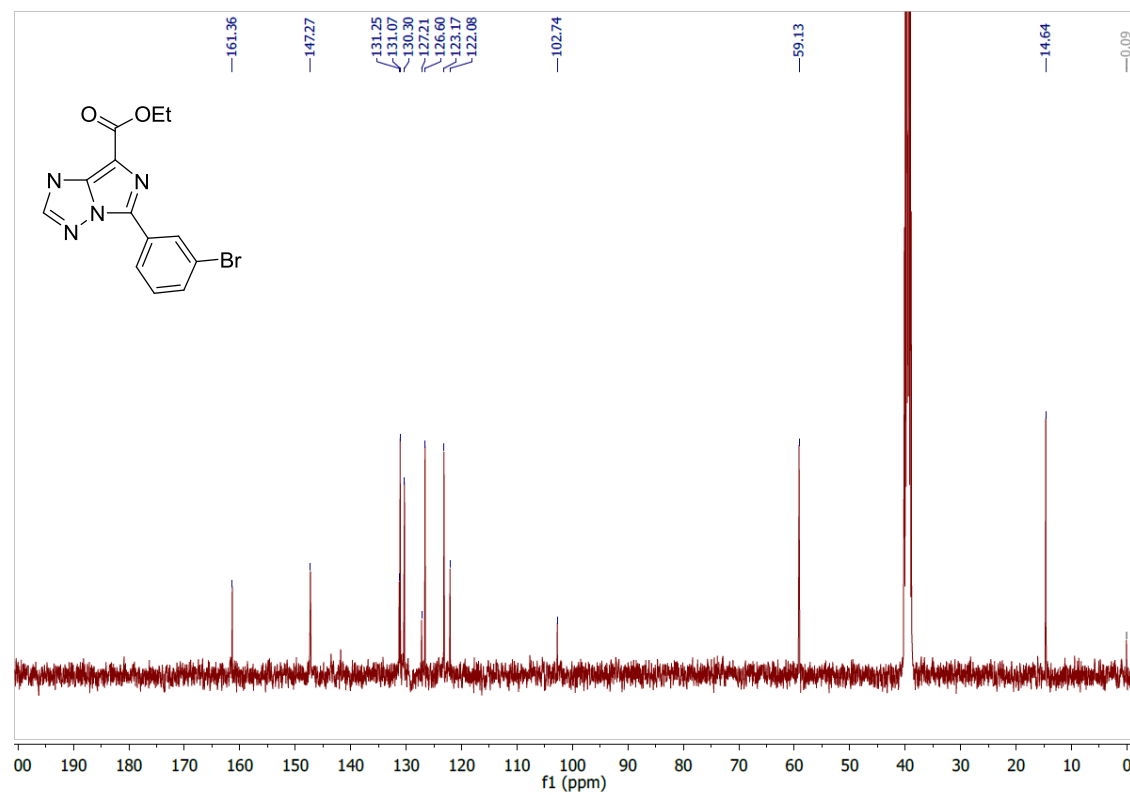

# Compound 4k

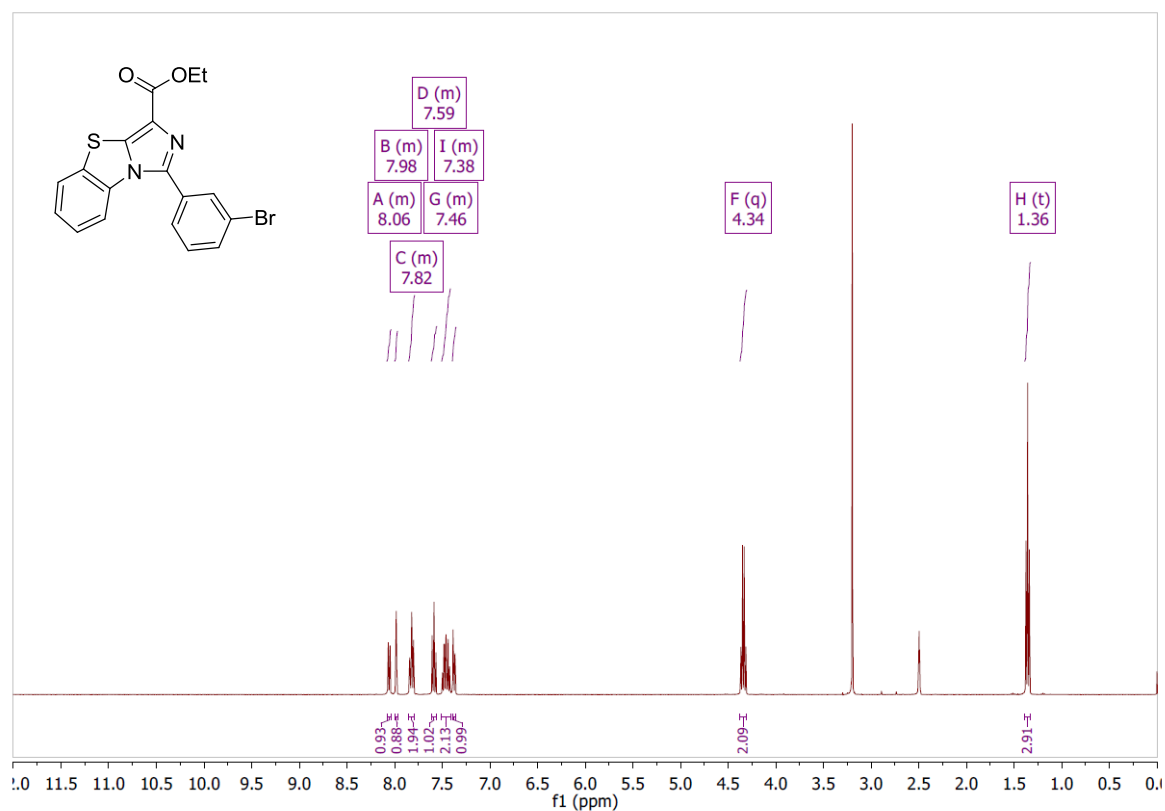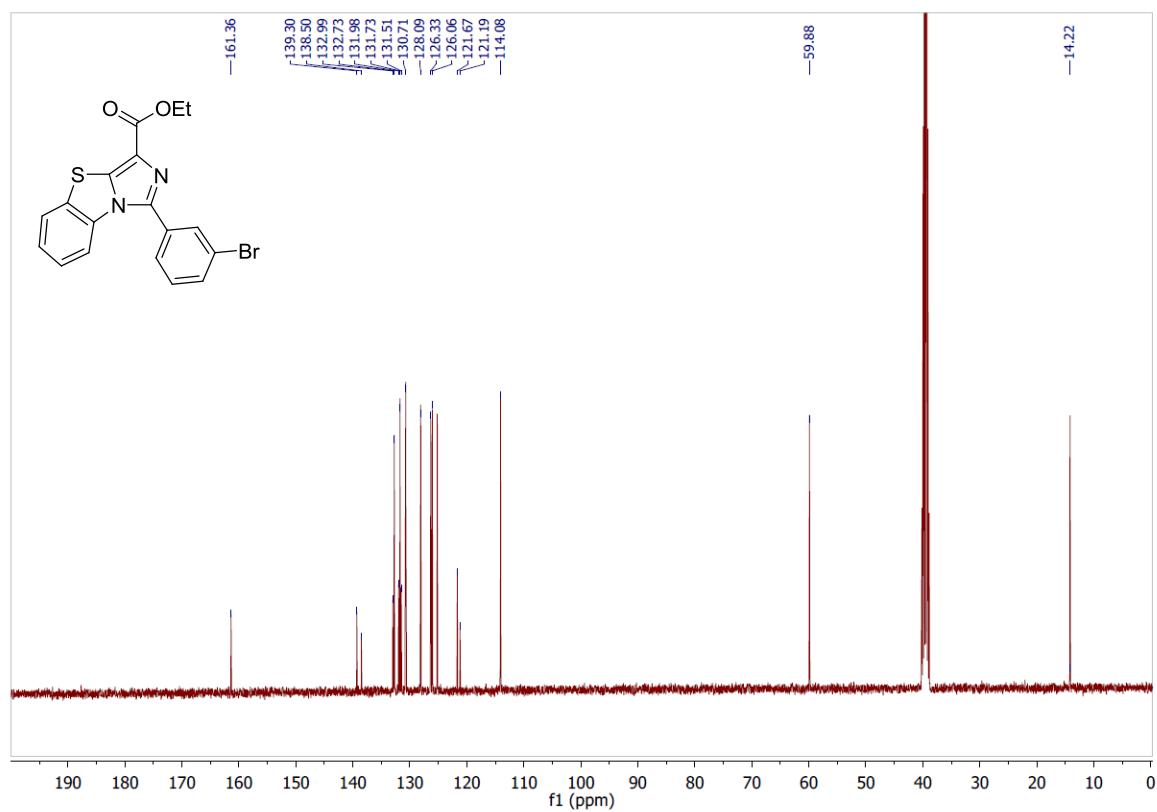

# Compound 4l

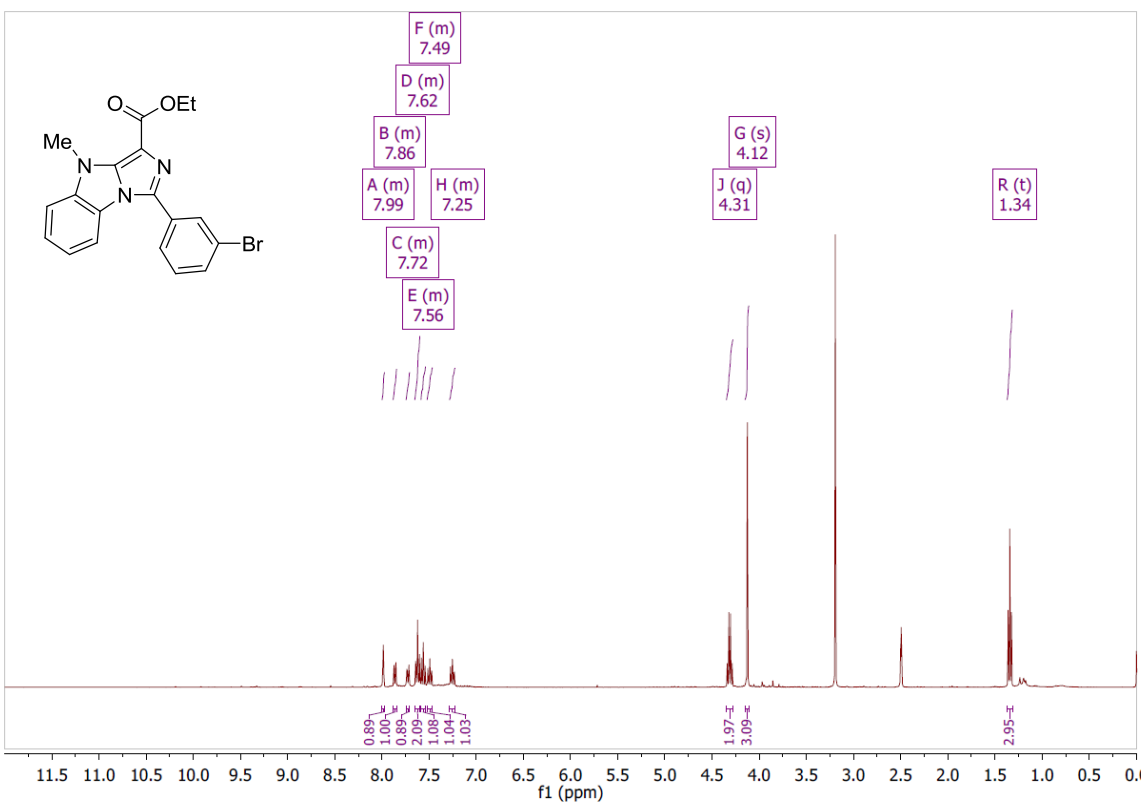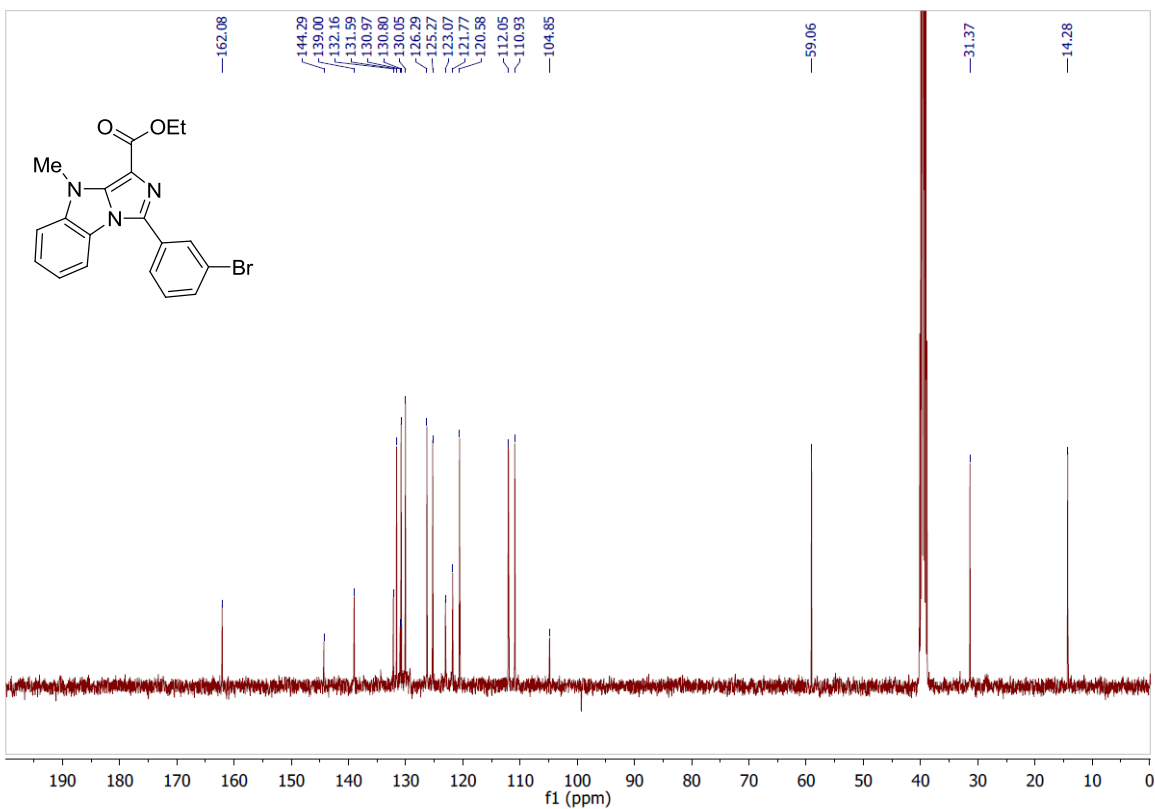

# Compound 4m

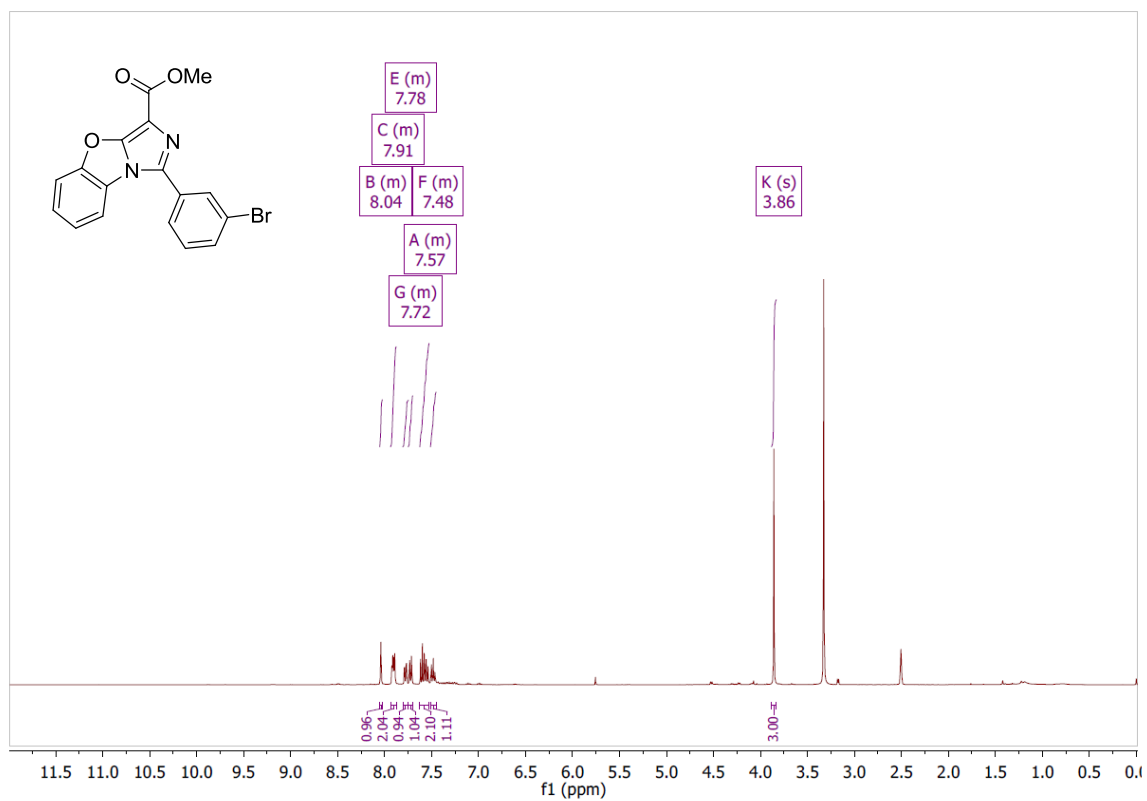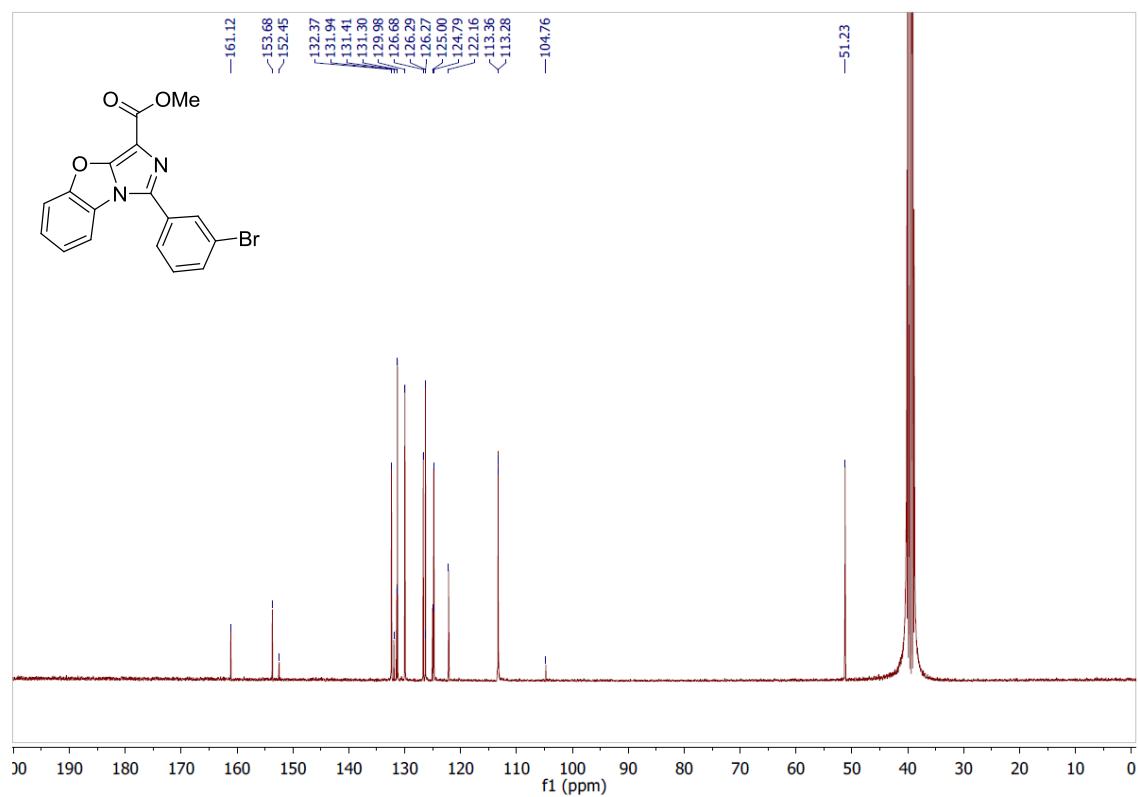



# Compound 4n

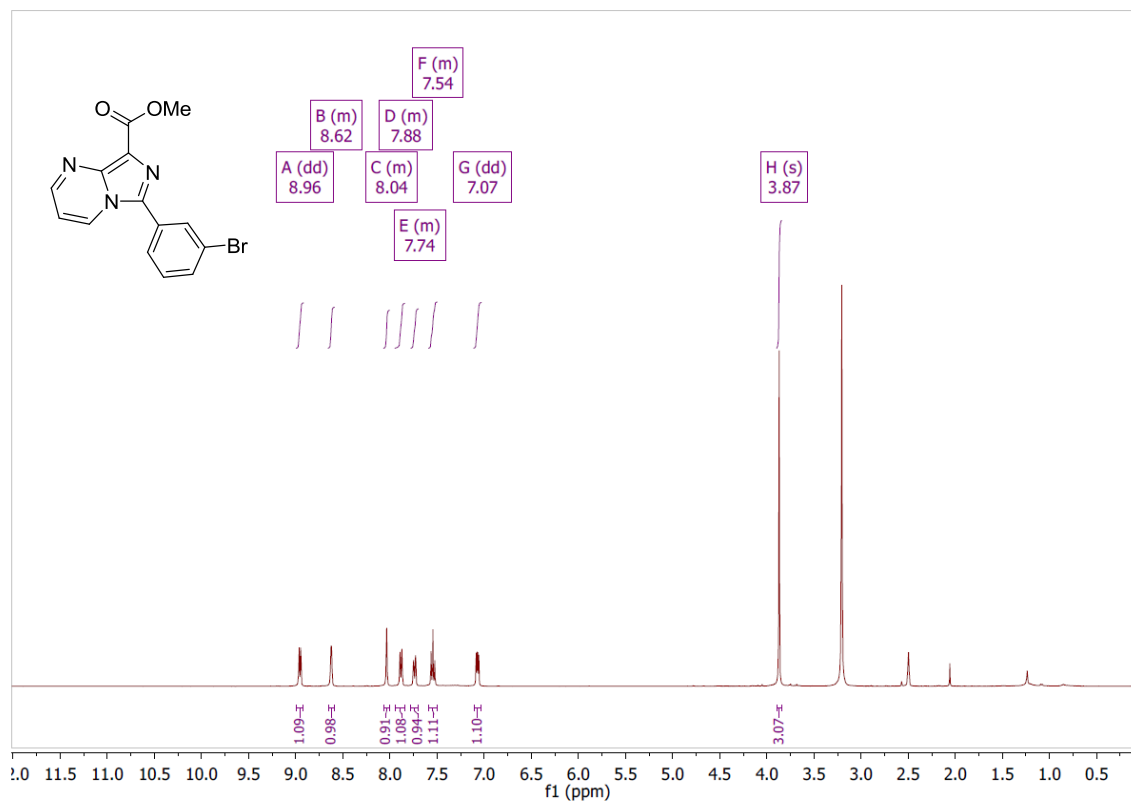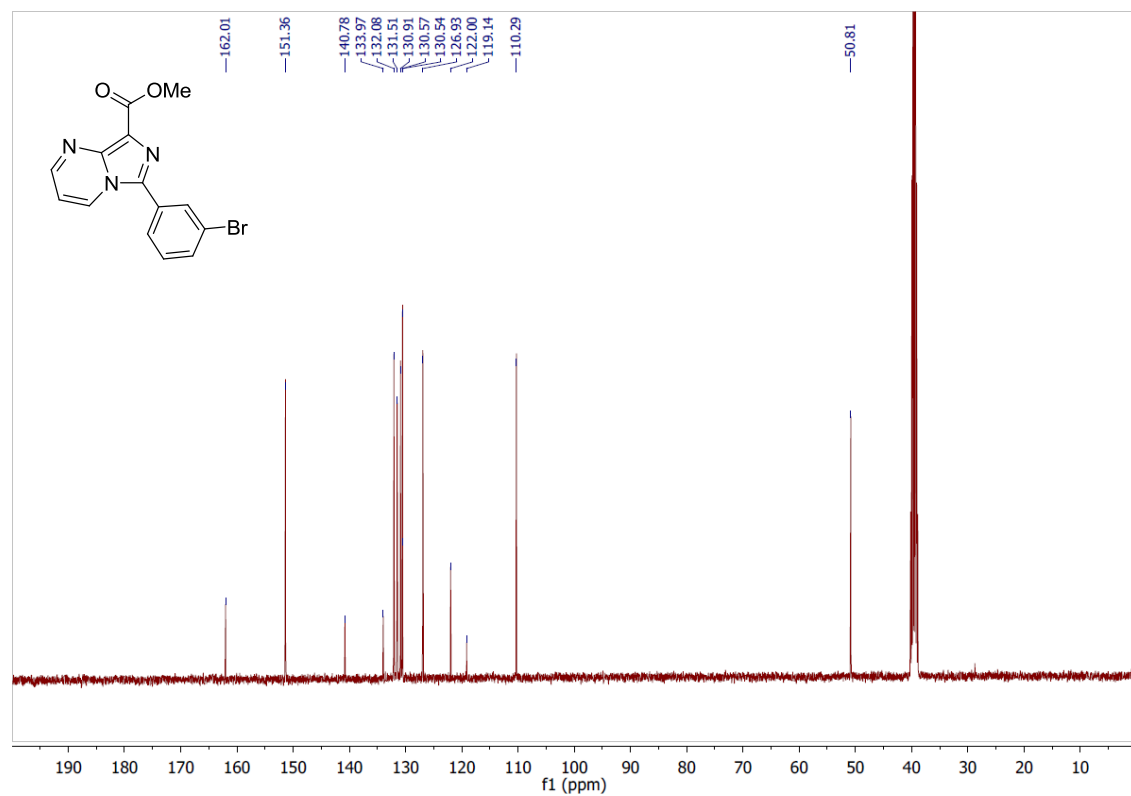

# Compound 4o

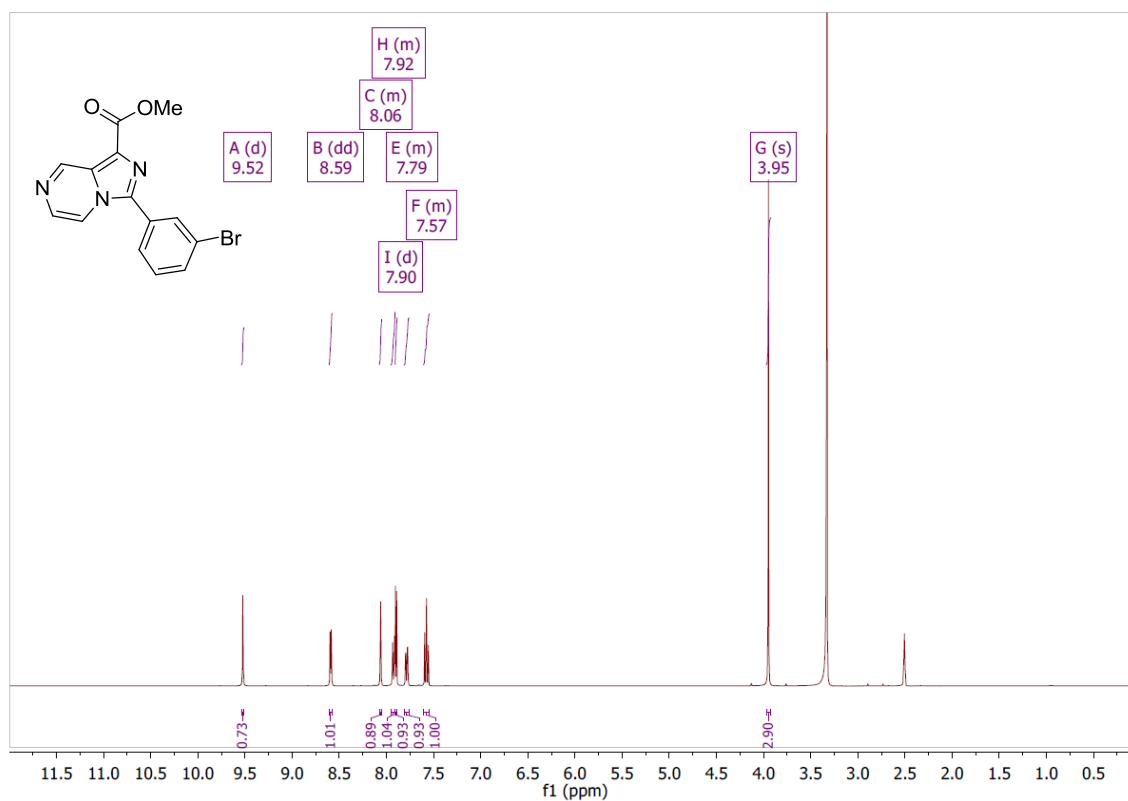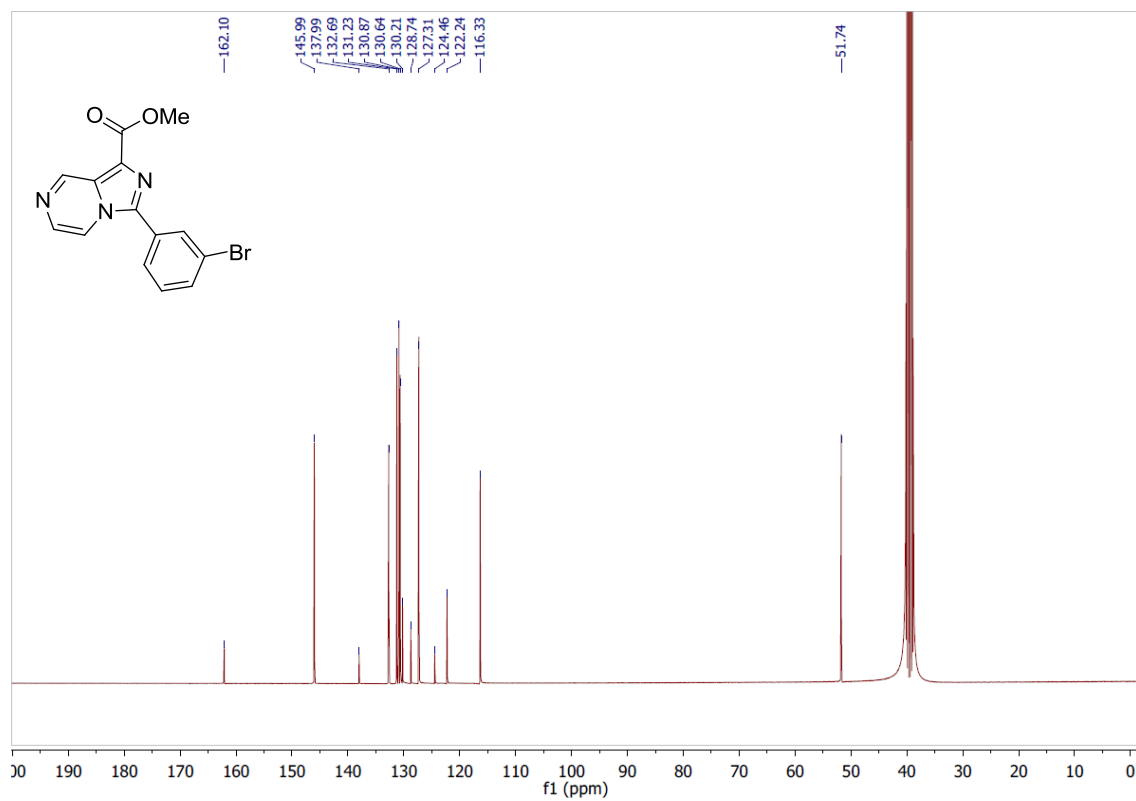

# Compound 4p

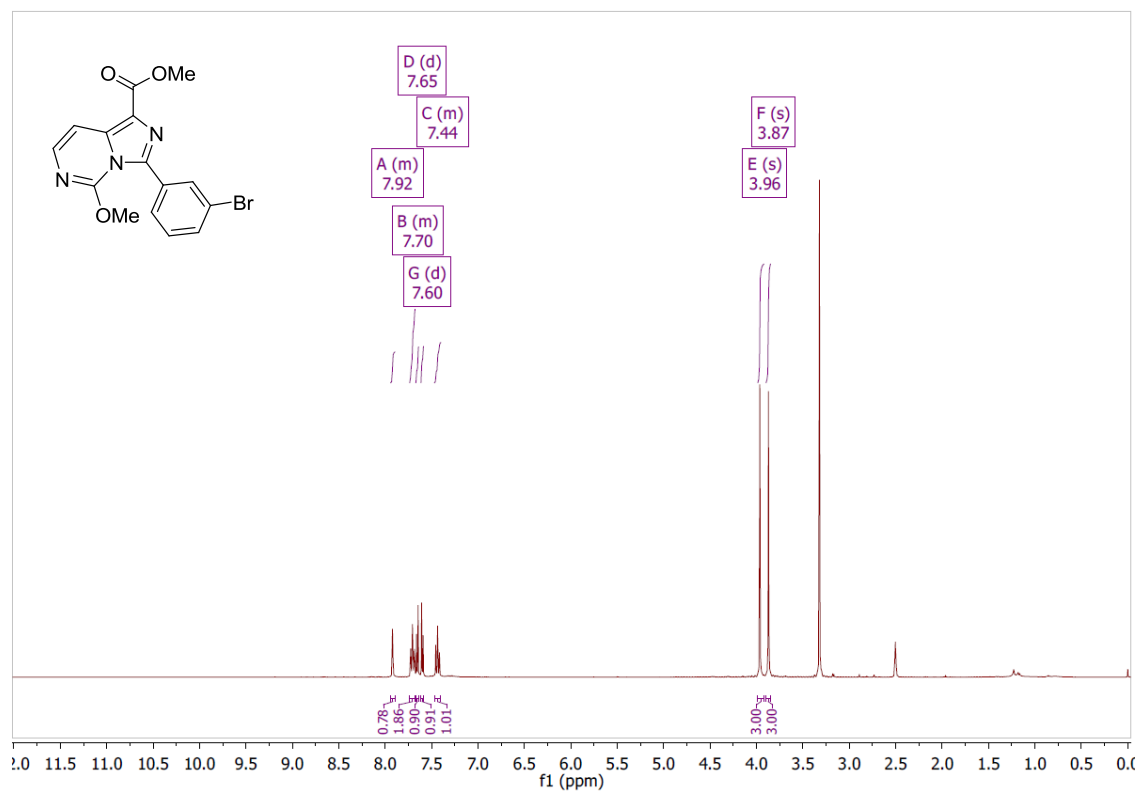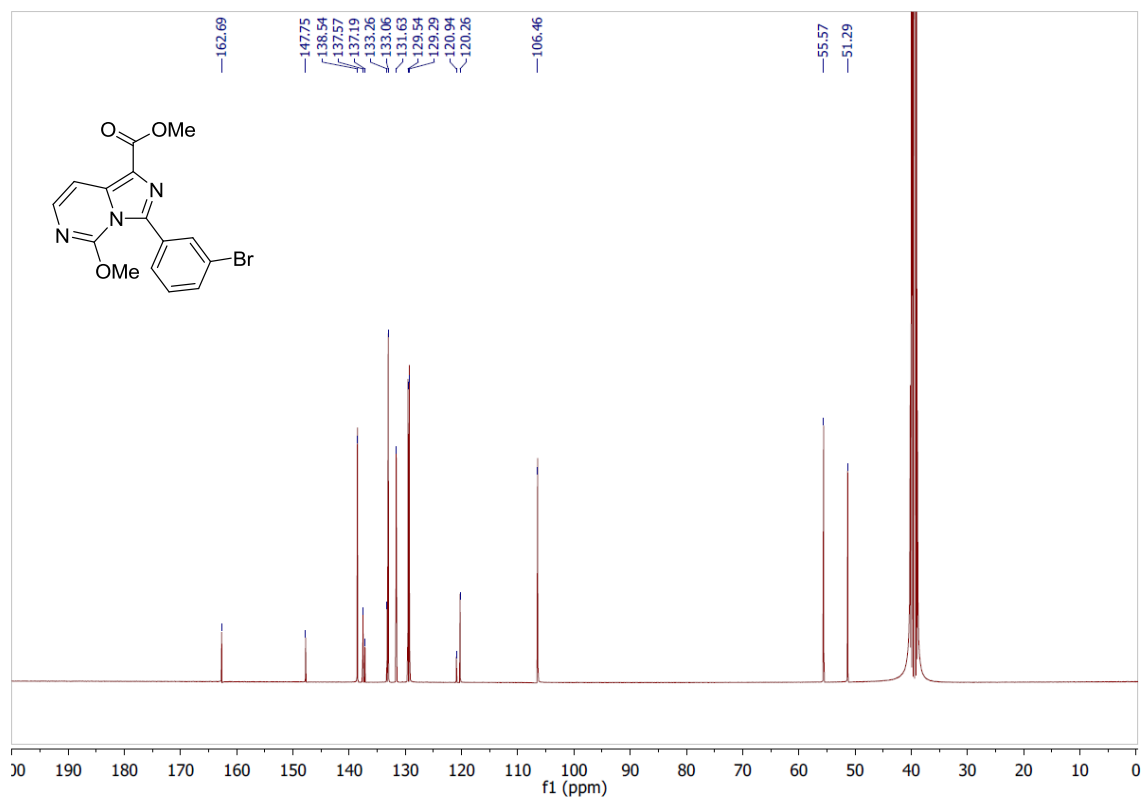

# Compound 4q

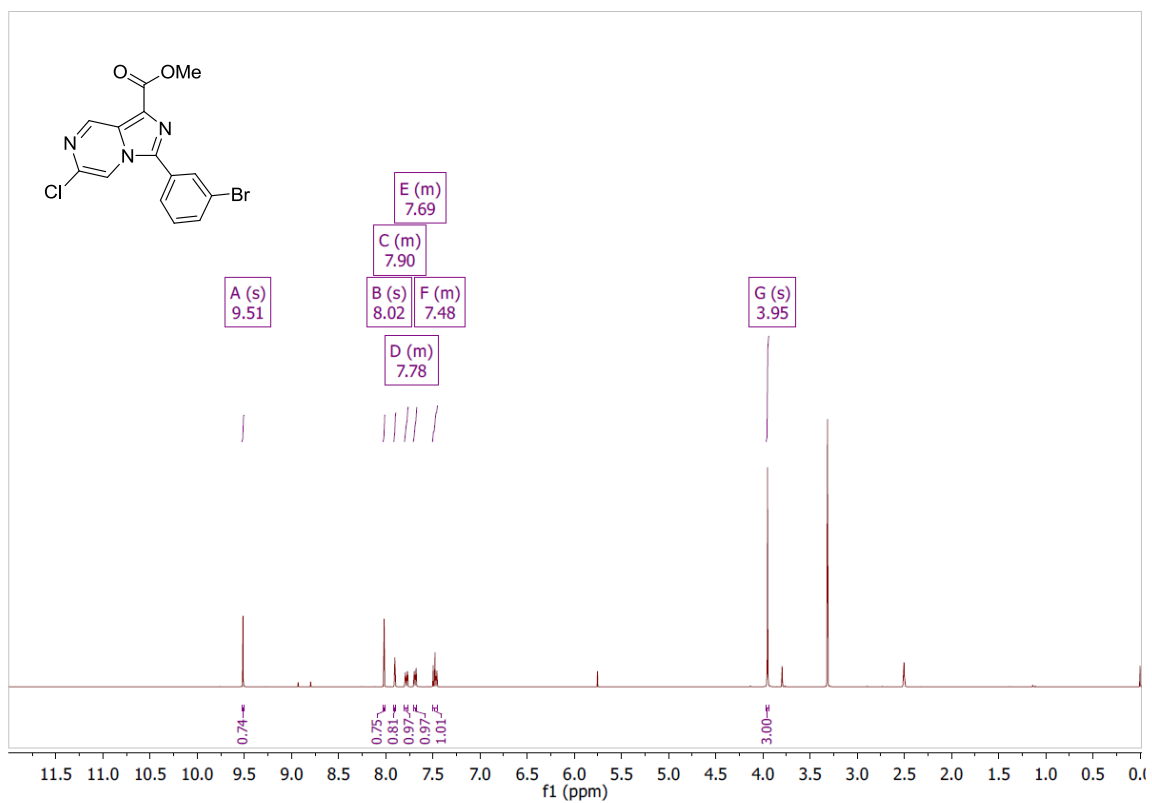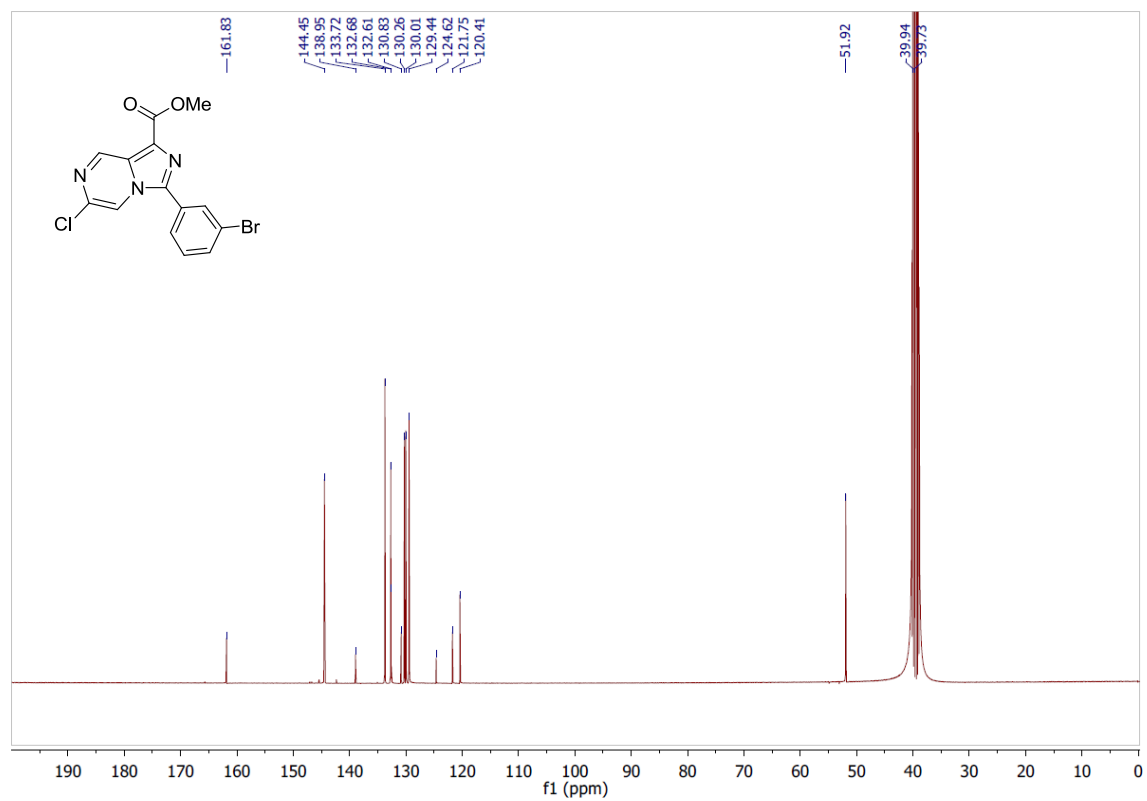

# Compound 4r

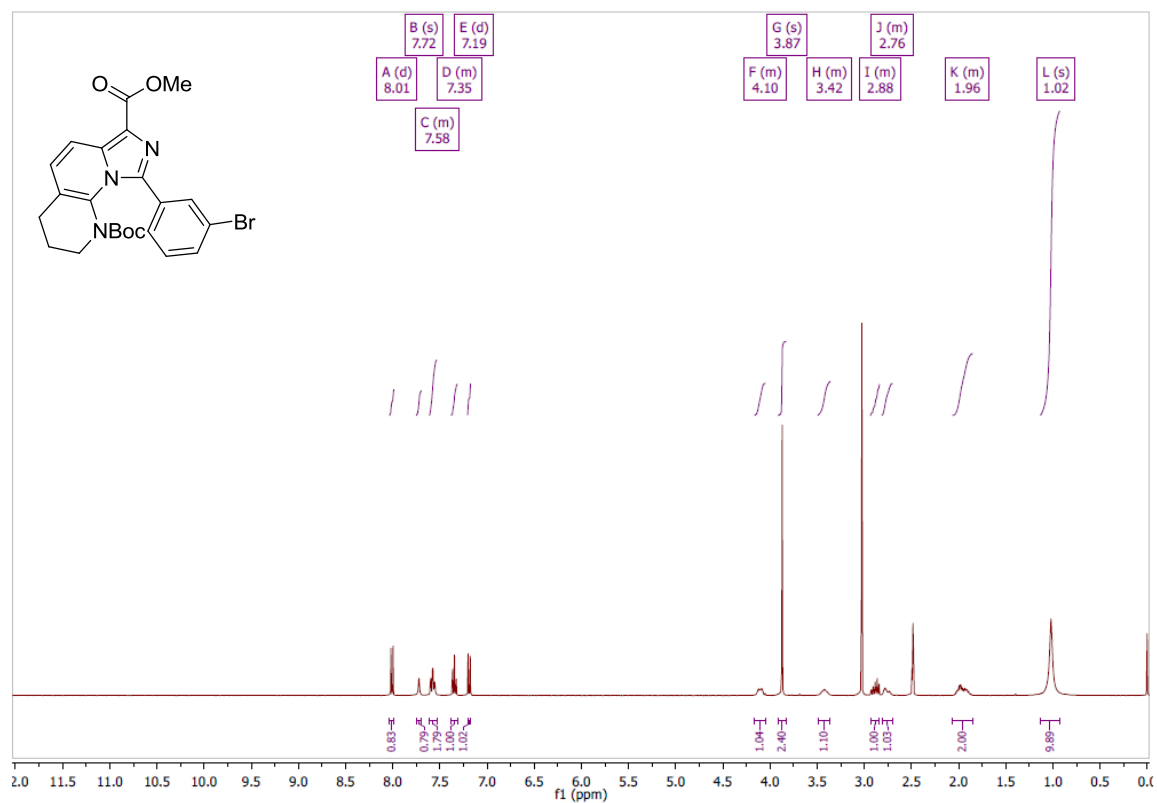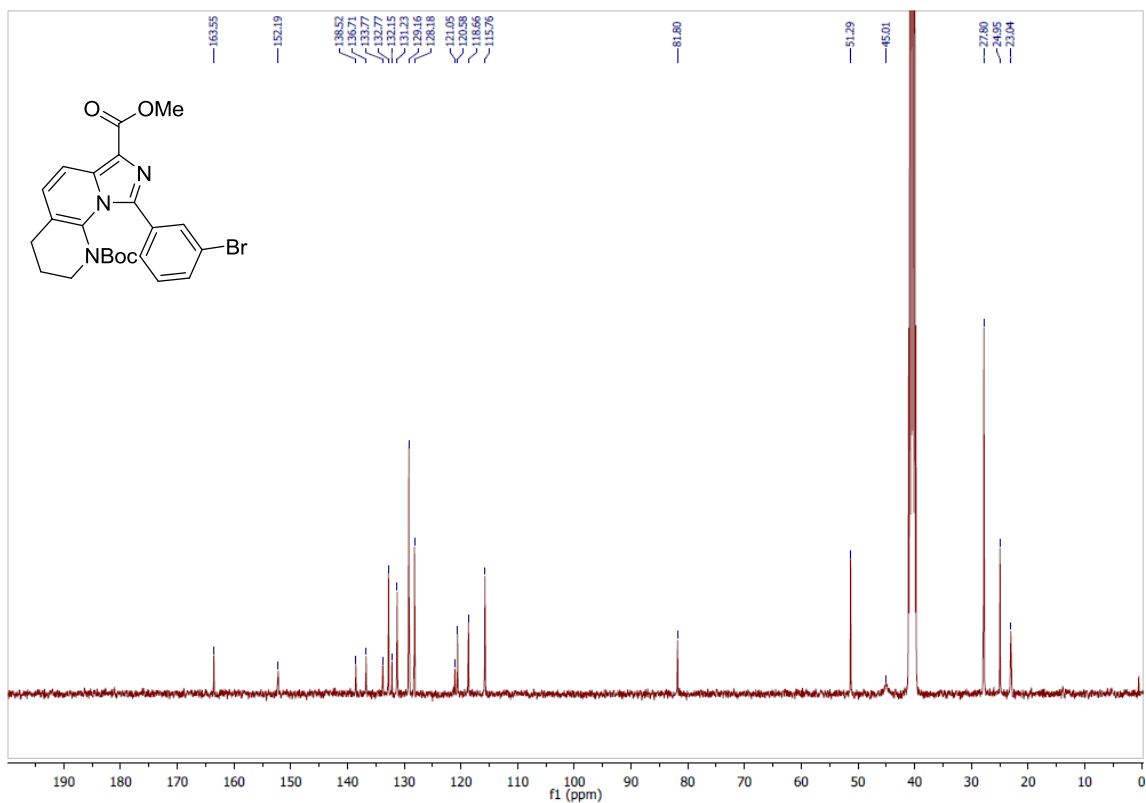

# Compound 4t

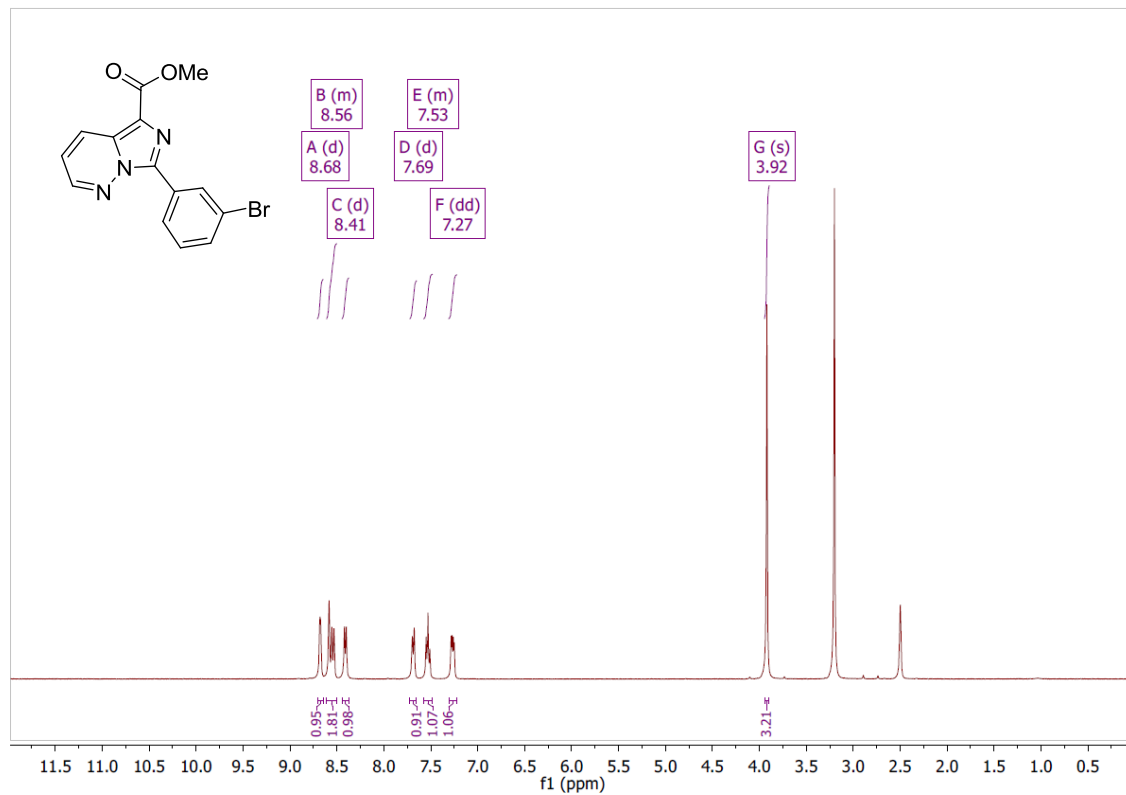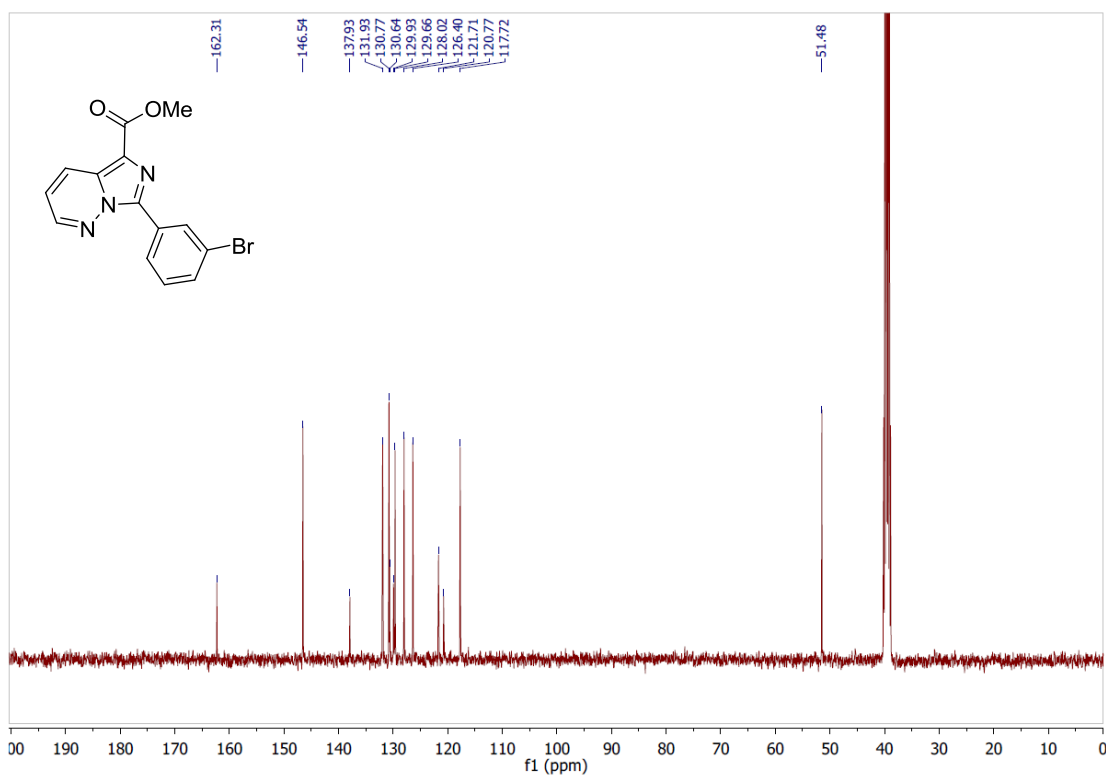

## Compound 5

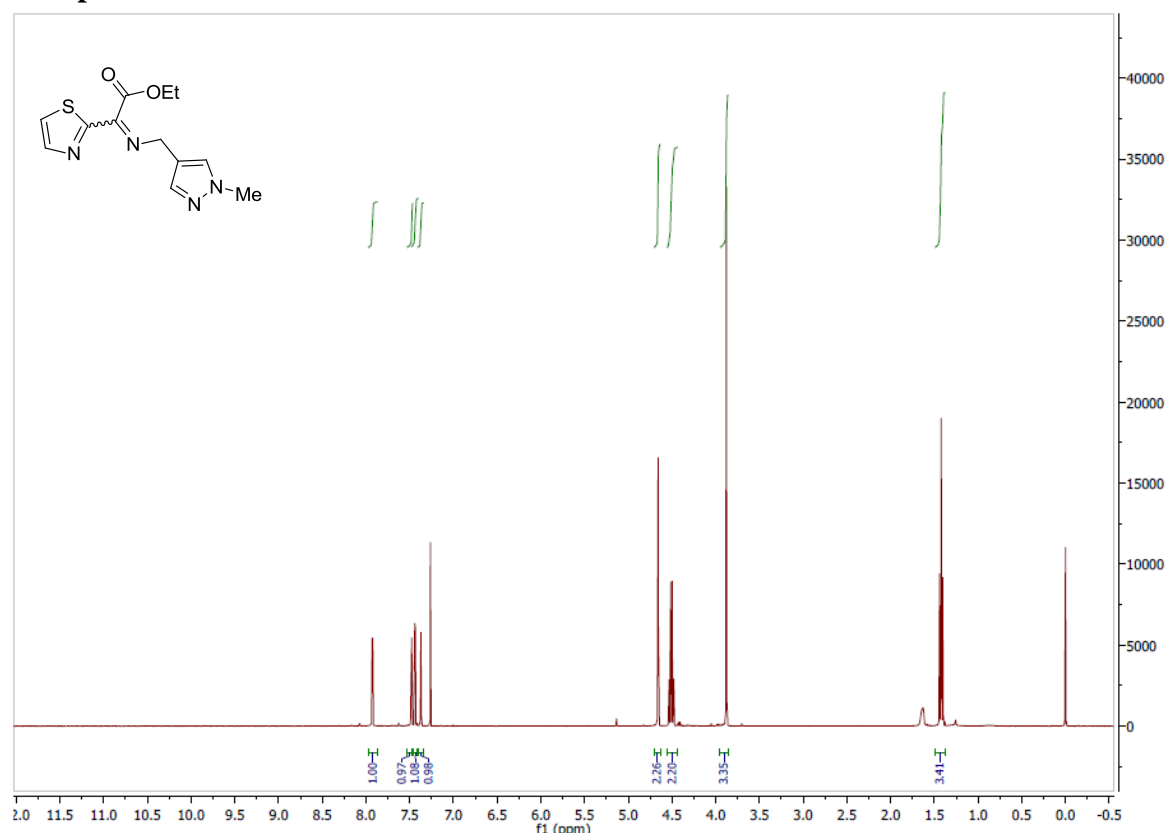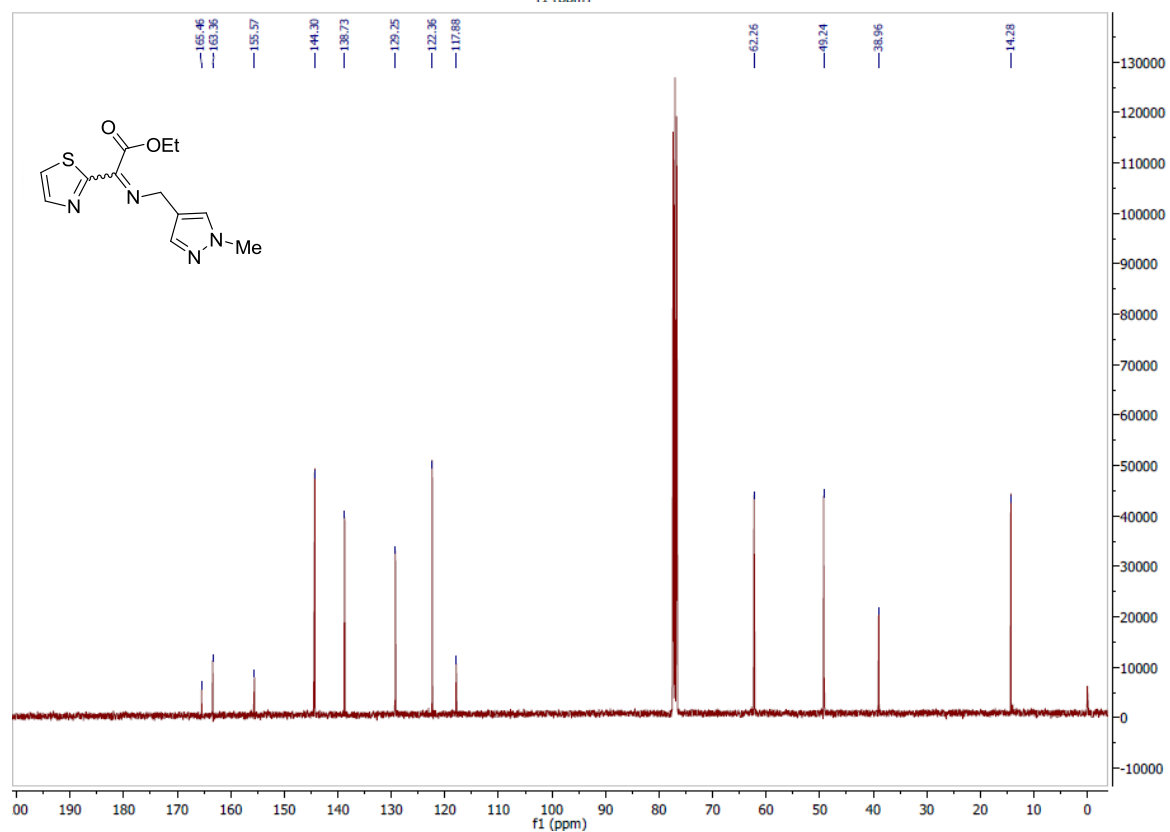

# Compound 6

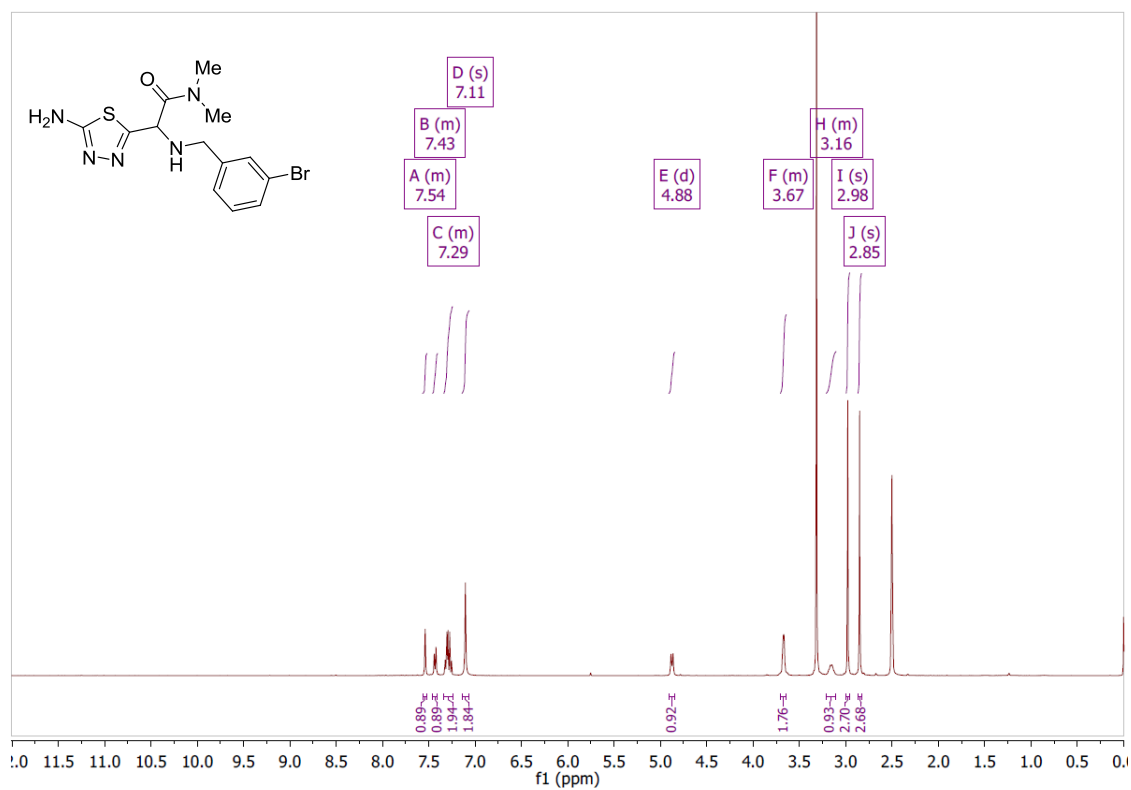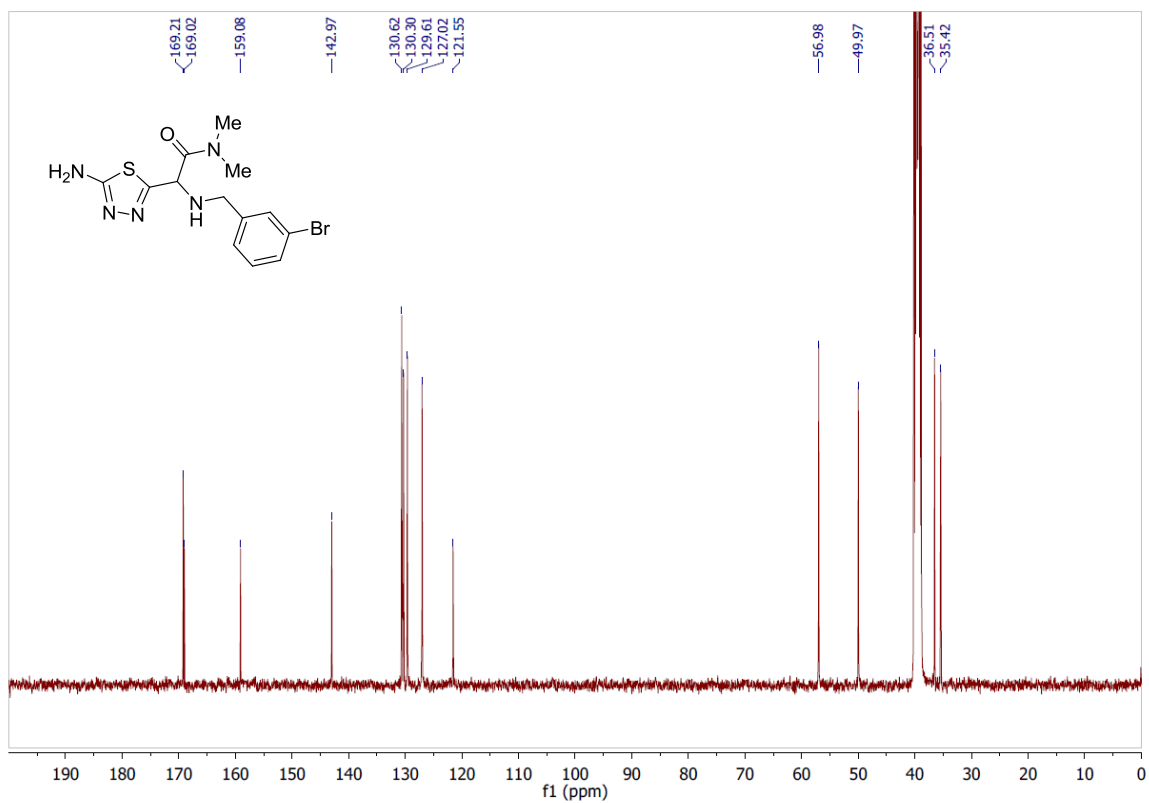



# Compound 4u

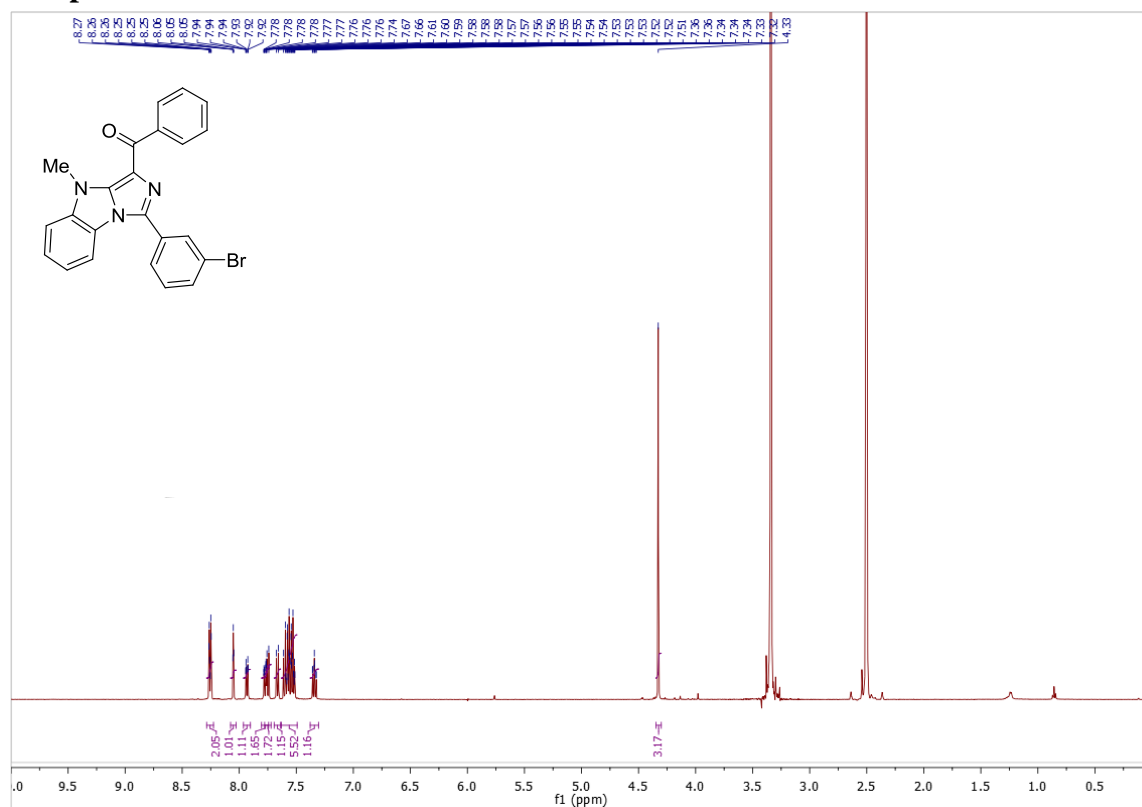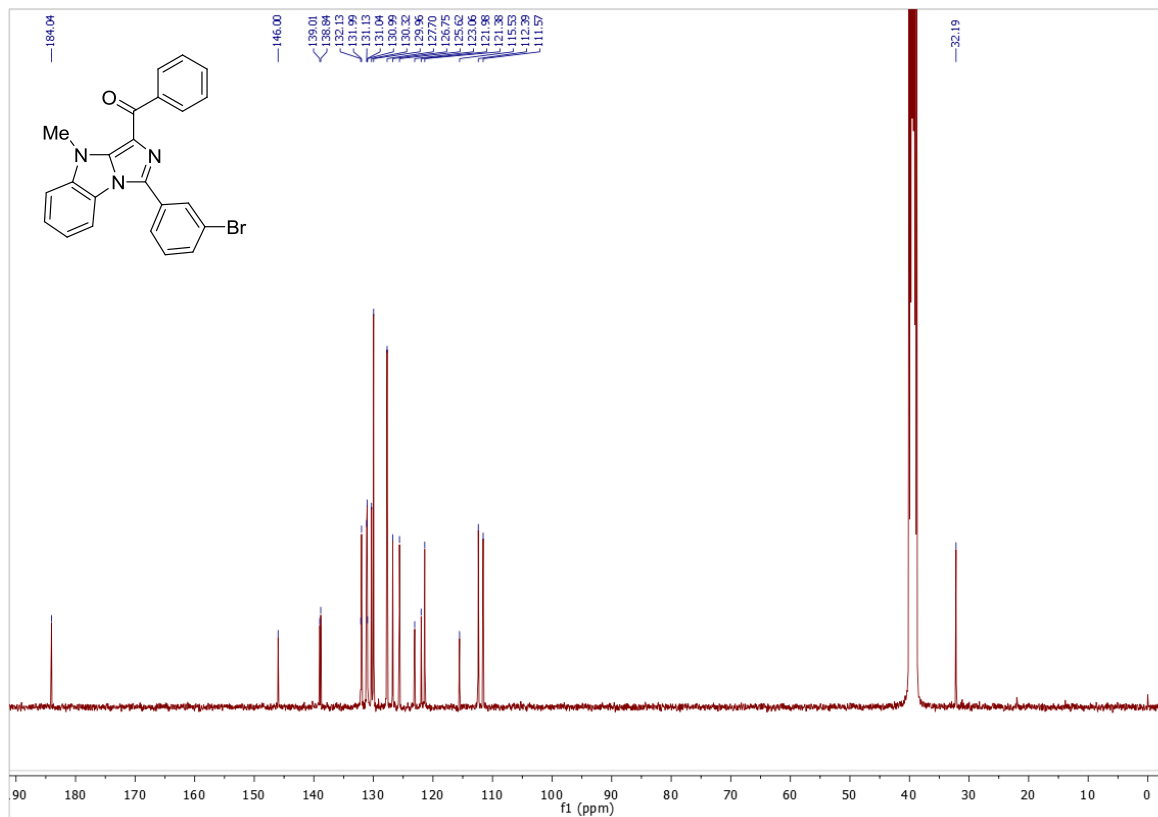

### Compound 7

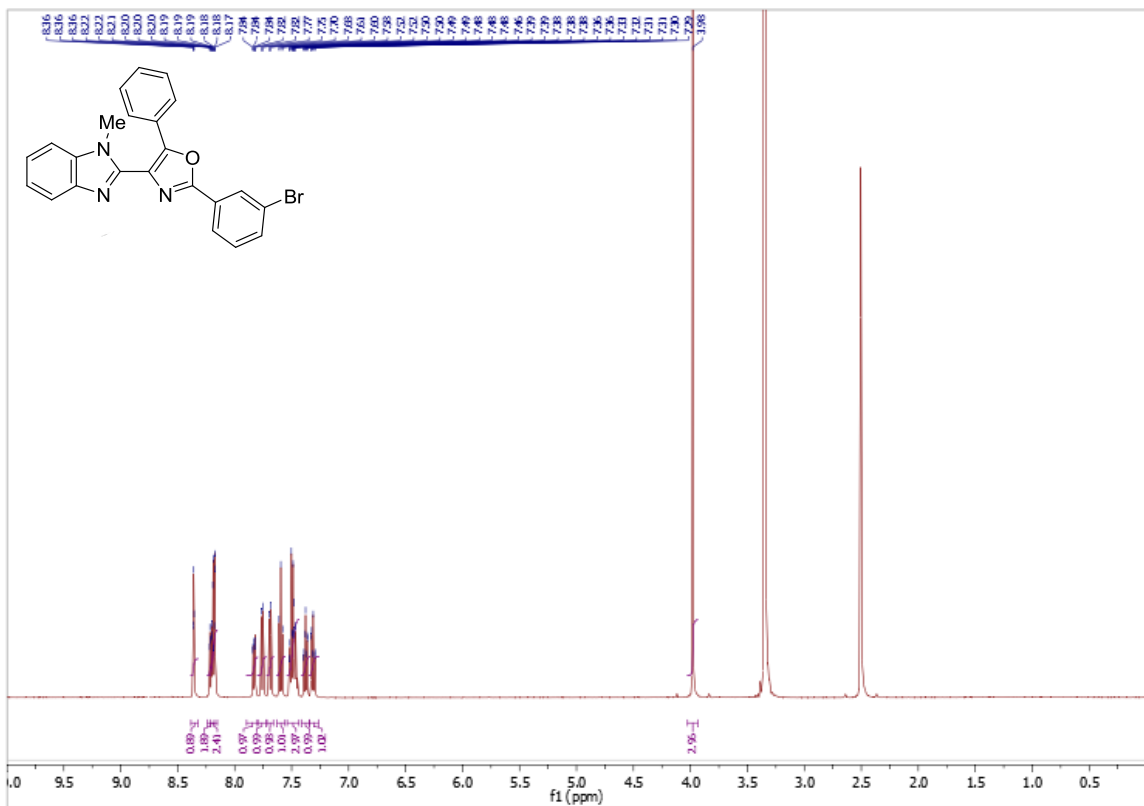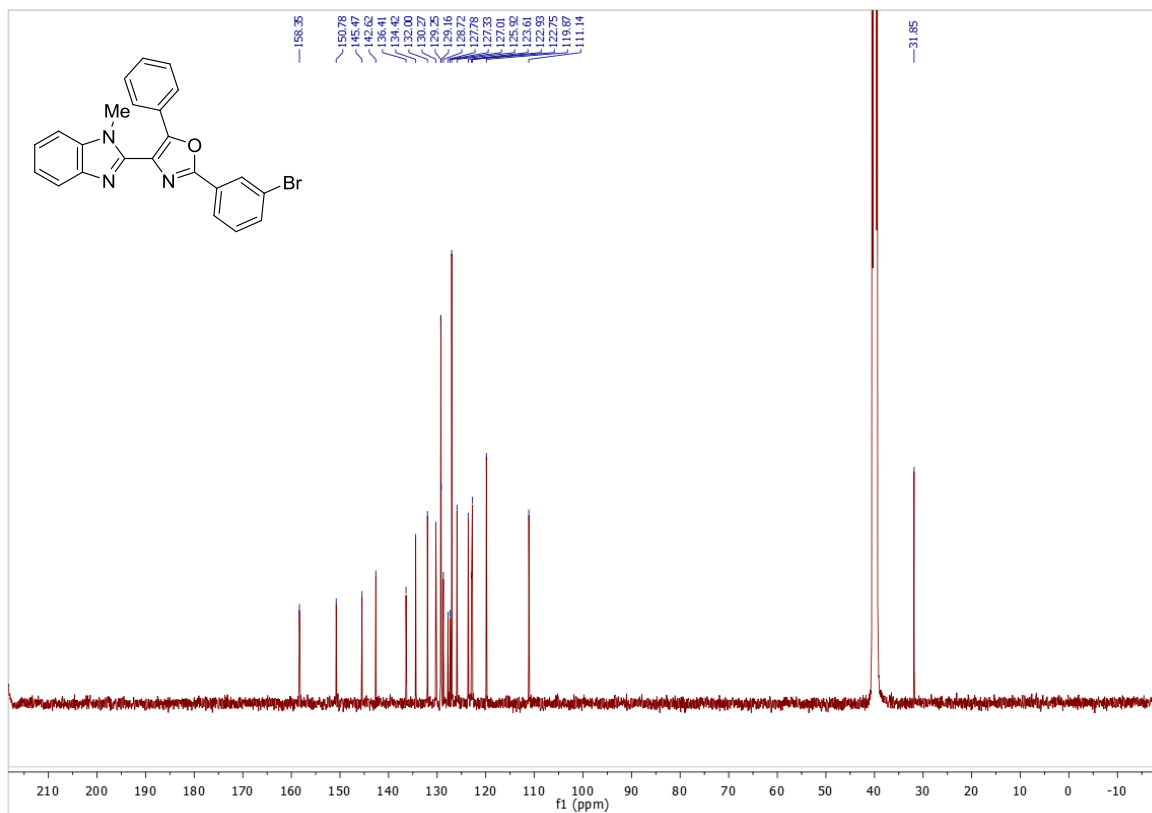

## Compound 8

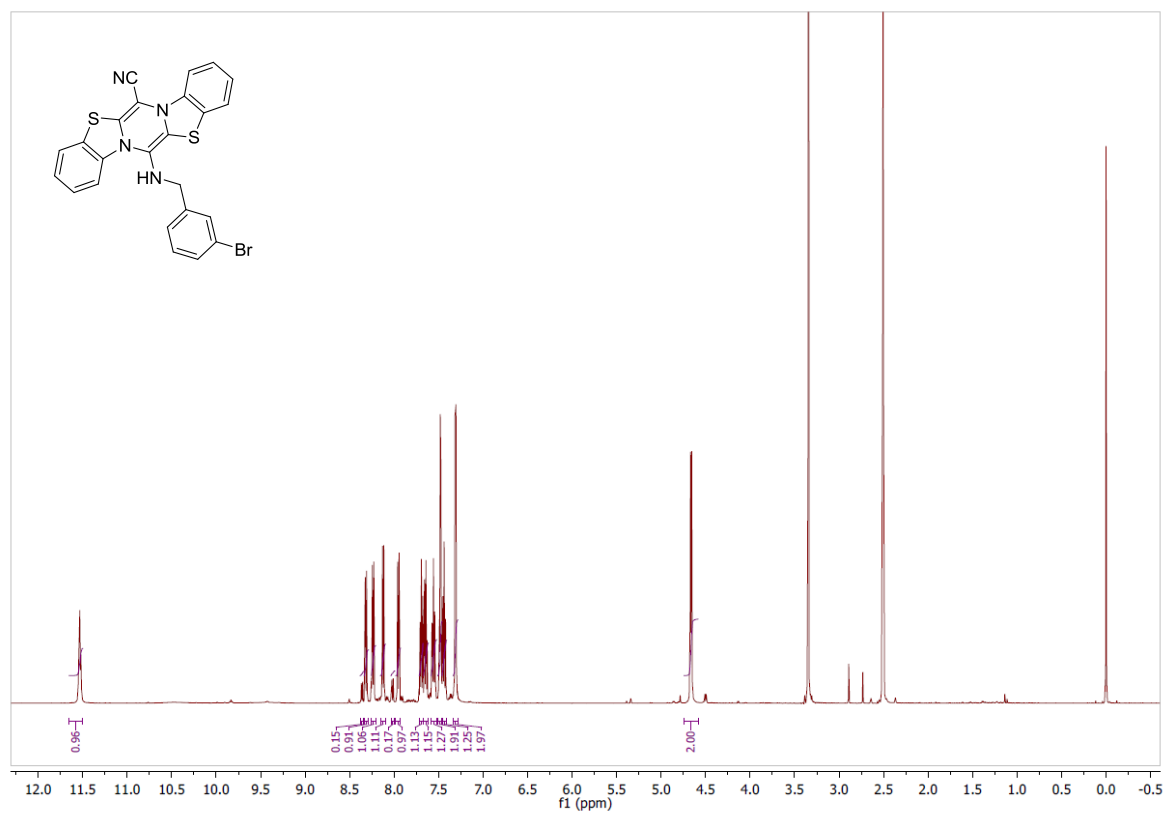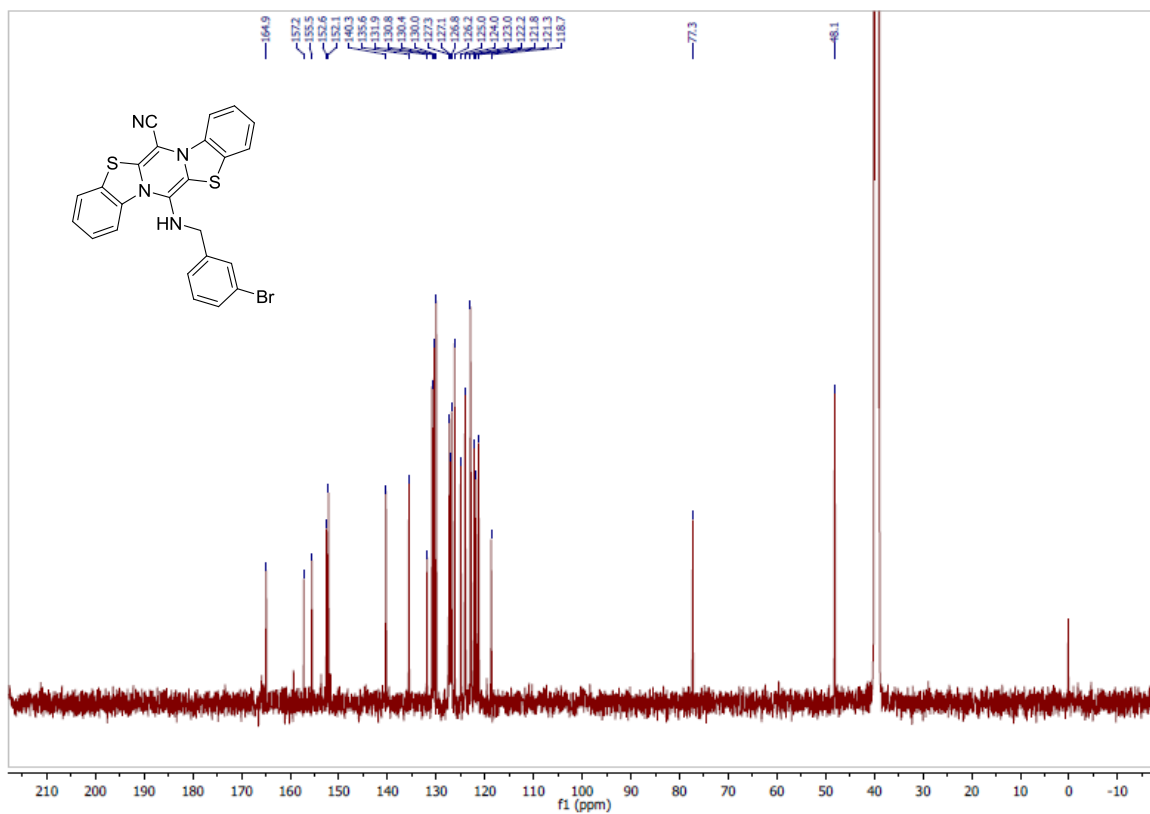

Supplement: Supplementary file 1 [file 5905047]
